# Supplementary material
Source: publisher figshare collection journal article supplement (https://rs.figshare.com/ndownloader/files/23589403)
Supplement: Supplementary file 1 [file 23589403]

## Sheet: Metadata
	Table S1. Physiological data for each species.
	The references for the data for each species are given as numbers, and the numbered references are listed in the last sheet.
	Species are arranged into each of the four groups (amphibians, squamates, birds, mammals). Within groups, species are arranged alphabetically by family name, and alphabetically within families by genus and species names.
	For amphibians and squamates, data are given on preferred body temperatures (Tb), critical thermal minimum (CTmin) and critical thermal maximum (CTmax).
	For birds and mammals, data are given for active body temperatures (Ta), lower thermal neutral zone (UTmin) and upper thermal neutral zone (UTmin).

## Sheet: Amphibians
Species	Species name in tree	Family	Tp	Tp-References	CTmin	CTmin-References	CTmax	CTmax-References
Ambystoma cingulatum	Ambystoma cingulatum	Ambystomatidae	18.6667	1
Ambystoma dumerilii	Ambystoma dumerilii	Ambystomatidae	17.94	2
Ambystoma jeffersonianum	Ambystoma jeffersonianum	Ambystomatidae	17.7667	3, 4			34	5
Ambystoma macrodactylum	Ambystoma macrodactylum	Ambystomatidae	21	6			35	7
Ambystoma maculatum	Ambystoma maculatum	Ambystomatidae	8.3	3, 8, 9			38.5	10
Ambystoma mexicanum	Ambystoma mexicanum	Ambystomatidae	20	2
Ambystoma opacum	Ambystoma opacum	Ambystomatidae	19.95	3, 11
Ambystoma ordinarium	Ambystoma ordinarium	Ambystomatidae	15.8	2, 12
Ambystoma tigrinum	Ambystoma tigrinum	Ambystomatidae	18.3571	2
Bufo alvarius	Bufo alvarius	Bufonidae			2.5	13	39.9	13
Bufo boreas	Bufo boreas	Bufonidae					36.5	13
Bufo canaliferus	Bufo canaliferus	Bufonidae			9.5	13	37.3	13
Bufo canorus	Bufo canorus	Bufonidae			-2	13	38	13
Bufo cocifer	Bufo coccifer	Bufonidae			2.8	13
Bufo cognatus	Bufo cognatus	Bufonidae			-4	13	41.3	13
Bufo debilis	Bufo debilis	Bufonidae			2.5	13	40.1	13
Bufo exsul	Bufo exsul	Bufonidae			-4	13	37.1	13
Bufo haemititicus	Bufo haematiticus	Bufonidae			9.5	13	37.5	13
Bufo leutkeni	Bufo luetkenii	Bufonidae			7.8	13
Bufo marinus	Bufo marinus	Bufonidae			11	13	41.8	13
Bufo marmoreus	Bufo marmoreus	Bufonidae			7.8	13	40.2	13
Bufo mazatlanensis	Bufo mazatlanensis	Bufonidae			5	13	39.9	13
Bufo nelsoni	Bufo nelsoni	Bufonidae					36.2	13
Bufo woodhousii fowleri	Bufo woodhousii	Bufonidae					41.1	14
Platymantis corrugatus	Platymantis corrugatus	Ceratobatrachidae					33.7	15
Platymantis dorsalis	Platymantis dorsalis	Ceratobatrachidae					32.9	15
Craugastor fitzingeri	Craugastor fitzingeri	Craugastoridae			8	13
Craugastor fleischmanni	Craugastor fleischmanni	Craugastoridae			2.5	13	31.4	13
Dendrobates auratus	Dendrobates auratus	Dendrobatidae			9.5	13	34.8	13
Dicamptodon ensatus	Dicamptodon ensatus	Dicamptodontidae	11.4143	3, 16
Limnonectes woodworthi	Limnonectes woodworthi	Dicroglossidae					35.9	15
Occidozyga laevis	Occidozyga laevis	Dicroglossidae					35.3	15
Paa spinosa	Paa spinosa	Dicroglossidae					42.1	17
Eleutherodactylus coqui	Eleutherodactylus coqui	Eleutherodactylidae			7.5	18	37.2	18
Eleutherodactylus portoricensus	Eleutherodactylus portoricensis	Eleutherodactylidae			7.5	18	36.3	18
Acris crepitans	Acris crepitans	Hylidae			-1	13
Cyclorana alboguttatus	Cyclorana alboguttata	Hylidae					33.8	19
Cyclorana brevipes	Cyclorana brevipes	Hylidae					40	19
Dendropsophus labialis	Dendropsophus labialis	Hylidae					38.6	20
Hyla chrysocelis	Hyla chrysoscelis	Hylidae			2.1	21
Hyla cinerea	Hyla cinerea	Hylidae			4.7	21
Hyla gratiosa	Hyla gratiosa	Hylidae			5.1	21
Hyla squirella	Hyla squirella	Hylidae			-1	13
Hyla walkeri	Hyla walkeri	Hylidae			-2.2	13	38.1	13
Litoria aurea	Litoria aurea	Hylidae					36.2	19
Litoria bicolor	Litoria bicolor	Hylidae					41.4	19
Litoria caerulea	Litoria caerulea	Hylidae					39.3	19
Litoria chloris	Litoria chloris	Hylidae					38.3	19
Litoria citropa	Litoria citropa	Hylidae					30.7	19
Litoria ewingi	Litoria ewingii	Hylidae					32.8	19
Litoria glauerti	Litoria fallax	Hylidae					41.6	19
Litoria freycineti	Litoria freycineti	Hylidae					31.3	19
Litoria gracilenta	Litoria gracilenta	Hylidae					39	22
Litoria lesueuri	Litoria lesueurii	Hylidae					34.5	19
Litoria peroni	Litoria peronii	Hylidae					36.2	19
Hyla phyllochroa	Litoria phyllochroa	Hylidae					29.7	19
Litoria rothi	Litoria rothii	Hylidae					39.4	19
Litoria rubella	Litoria rubella	Hylidae					41.6	19
Litoria verreauxi	Litoria verreauxii	Hylidae					32	19
Hyla lesueuri	Litoria wilcoxii	Hylidae					33.1	19
Pachymedusa dacnicolor	Pachymedusa dacnicolor	Hylidae			2.5	13	28.8	13
Hyla bicolor	Phyllomedusa bicolor	Hylidae					41.4	19
Pseudacris cadaverina	Pseudacris cadaverina	Hylidae					36.8	13
Pseudacris regilla	Pseudacris regilla	Hylidae			-1	13	36.6	13
Pseudacris triseriata	Pseudacris triseriata	Hylidae			-3	23	38.1	24
Smilisca baudini	Smilisca baudinii	Hylidae			5	13	40.4	13
Smilisca fodiens	Smilisca fodiens	Hylidae			6.5	13	39.5	13
Smiliscaa phaeota	Smilisca phaeota	Hylidae			2.8	13
Tlalocohyla smithi	Tlalocohyla smithii	Hylidae			5	13	42.5	13
Engystomops pustulosus	Engystomops pustulosus	Leptodactylidae			6	13
Leptodactylus melanotus	Leptodactylus melanonotus	Leptodactylidae			5	13	39.8	13
Leptodactylus pentadactylus	Leptodactylus pentadactylus	Leptodactylidae			6	13
Gastrophyrne mazatlanensis	Gastrophryne olivacea	Microhylidae			2.5	13
Hypophacus sp	Hypopachus variolosus	Microhylidae			2.5	13
Adelotus brevis	Adelotus brevis	Myobatrachidae					31.2	19
Crinia darlingtoni	Assa darlingtoni	Myobatrachidae					31	19
Crinia parainsignifera	Crinia parinsignifera	Myobatrachidae					34	19
Crinia signifera	Crinia signifera	Myobatrachidae					35.7	19
Crinia victoriana	Geocrinia victoriana	Myobatrachidae					35	19
Limnodynastes dorsalis	Limnodynastes dorsalis	Myobatrachidae					36.5	19
Limnodynastes fletcheri	Limnodynastes fletcheri	Myobatrachidae					28.3	19
Limnodynastes peroni	Limnodynastes peronii	Myobatrachidae					34.1	19
Limnodynastes Salmini	Limnodynastes Salmini	Myobatrachidae					34.5	19
Limnodynastes tasmaniensis	Limnodynastes tasmaniensis	Myobatrachidae					34.9	19
Myxophyes fasciolatus	Mixophyes fasciolatus	Myobatrachidae					30.5	19
Neobatrachus pictus	Neobatrachus pictus	Myobatrachidae					29.3	19
Philoria sphagnicola	Philoria sphagnicolus	Myobatrachidae					25.8	19
Pseudophryne bibroni	Pseudophryne bibronii	Myobatrachidae					36.2	19
Aneides aeneus	Aneides aeneus	Plethodontidae	18	25, 26
Aneides ferreus	Aneides ferreus	Plethodontidae	18.75	3
Aneides flavipunctatus	Aneides flavipunctatus	Plethodontidae	11.0917	27
Aneides hardii	Aneides hardii	Plethodontidae	14.5	28
Aneides lugubris	Aneides lugubris	Plethodontidae	10.35	3, 27-30
Batrachoseps attenuatus	Batrachoseps attenuatus	Plethodontidae	11.22	27, 29, 31
Batrachoseps nigriventris	Batrachoseps nigriventris	Plethodontidae	8.8	2
Batrachoseps pacificus	Batrachoseps pacificus	Plethodontidae	16.1	3, 32
Batrachoseps wrighti	Batrachoseps wrighti	Plethodontidae	8	28
Bolitoglossa adspersa	Bolitoglossa adspersa	Plethodontidae	15	33
Bolitoglossa dunni	Bolitoglossa dunni	Plethodontidae	21.8	2
Bolitoglossa engelhardti	Bolitoglossa engelhardti	Plethodontidae	15.65	2
Bolitoglossa franklini	Bolitoglossa franklini	Plethodontidae	14.6286	2
Bolitoglossa hartwegi	Bolitoglossa hartwegi	Plethodontidae	12.8	2
Bolitoglossa replendens	Bolitoglossa lincolni	Plethodontidae	12.3	2
Bolitoglossa mexicana	Bolitoglossa mexicana	Plethodontidae	20.5	2
Bolitoglossa morio	Bolitoglossa morio	Plethodontidae	12.65	2
Bolitoglossa occidentalis	Bolitoglossa occidentalis	Plethodontidae	23.8167	2
Bolitoglossa platydactyla	Bolitoglossa platydactyla	Plethodontidae	24.3	2
Bolitoglossa rostrata	Bolitoglossa rostrata	Plethodontidae	12.8429	2
Bolitoglossa rufescens	Bolitoglossa rufescens	Plethodontidae	21.675	2
Bolitoglossa subpalmata	Bolitoglossa subpalmata	Plethodontidae	12	2, 34
Chiropterotriton Chondrostega	Chiropterotriton Chondrostega	Plethodontidae	12	2
Chiropterotriton dimidiata	Chiropterotriton dimidiatus	Plethodontidae	10.8	2
Chiropterotriton lavae	Chiropterotriton lavae	Plethodontidae	20.3	2
Chiropterotriton multidentata	Chiropterotriton multidentatus	Plethodontidae	10.55	2
Desmognathus fuscus	Desmognathus fuscus	Plethodontidae			-2.3	35	34.9	35
Desmognathus monticola	Desmognathus monticola	Plethodontidae	12.5923	3, 36
Desmognathus ochrophaeus	Desmognathus ochrophaeus	Plethodontidae	12.8071	36-38			31.5	39
Desmognathus quadramaculatus	Desmognathus quadramaculatus	Plethodontidae					31.9	39
Desmognathus wrighti	Desmognathus wrighti	Plethodontidae	17.1	37
Ensatina eschscholtzii	Ensatina eschscholtzii	Plethodontidae	11.1071	3, 27, 29, 40
Eurycea bislineata	Eurycea bislineata	Plethodontidae	5.5	41	-2	35, 42	35	35, 42
Eurycea longicauda	Eurycea longicauda	Plethodontidae	17.5	43, 44			37.6	10
Eurycea lucifuga	Eurycea lucifuga	Plethodontidae	15.6	43, 44			37.2	10
Eurycea multiplicata	Eurycea multiplicata	Plethodontidae					37.5	10
Eurycea nana	Eurycea nana	Plethodontidae					37.2	45
Typhlomolge rathbuni	Eurycea rathbuni	Plethodontidae	22	3
Ensatina b. wilderae	Eurycea wilderae	Plethodontidae	17.05	37
Gyrinophilus palleucus	Gyrinophilus palleucus	Plethodontidae	12	46
Gyrinophilus porphyriticus	Gyrinophilus porphyriticus	Plethodontidae	8.1	2
Hydromantes brunus	Hydromantes brunus	Plethodontidae	11.4	2
Hydromantes platycephalus	Hydromantes platycephalus	Plethodontidae	10.95	3, 37
Hydromantes shastae	Hydromantes shastae	Plethodontidae	12.2	3, 47
Lineatriton lineola	Lineatriton lineolus	Plethodontidae	18.6	2
Parvimolge townsendi	Parvimolge townsendi	Plethodontidae	18.3	2
Plethodon caddoensis	Plethodon caddoensis	Plethodontidae	16.2	43
Plethodon cinereus	Plethodon cinereus	Plethodontidae	10.2286	37, 41, 43, 48, 49
Plethodon dorsalis	Plethodon dorsalis	Plethodontidae	12	43
Plethodon dunni	Plethodon dunni	Plethodontidae	10.95	3, 28
Plethodon glutinosus	Plethodon glutinosus	Plethodontidae	16.08	3, 37, 43			34.3	50
Plethodon metcalfi	Plethodon metcalfi	Plethodontidae	17	37
Plethodon neomexicanus	Plethodon neomexicanus	Plethodontidae	12.8	28, 51
Plethodon ouachitae	Plethodon ouachitae	Plethodontidae	17	43
Plethodon vandykei	Plethodon vandykei	Plethodontidae	6	28
Plethodon vechiculum	Plethodon vehiculum	Plethodontidae	10.5	3
Plethodon welleri	Plethodon welleri	Plethodontidae	16.1	37
Pseudoeurycea bellii	Pseudoeurycea bellii	Plethodontidae	14.55	2
Pseudoeurycea brunnata	Pseudoeurycea brunnata	Plethodontidae	12.5667	2
Pseudoeurycea cephalica	Pseudoeurycea cephalica	Plethodontidae	10.35	2
Pseudoeurycea cochranae	Pseudoeurycea cochranae	Plethodontidae	13.35	2
Pseudoeurycea gaebeli	Pseudoeurycea goebeli	Plethodontidae	11.1	2, 52
Pseudoeurycea leprosa	Pseudoeurycea leprosa	Plethodontidae	12.6	2
Pseudoeurycea nigromaculata	Pseudoeurycea nigromaculata	Plethodontidae	10.3	2
Pseudoeurycea rex	Pseudoeurycea rex	Plethodontidae	11.4667	2
Pseudoeurycea robertsi	Pseudoeurycea robertsi	Plethodontidae	12.1	2
Pseudoeurycea smithi	Pseudoeurycea smithi	Plethodontidae	14.2	2
Pseudoeurycea unguidentis	Pseudoeurycea unguidentis	Plethodontidae	15.3	2
Pseudotriton ruber	Pseudotriton ruber	Plethodontidae					35.3	39
Thorius dubitus	Thorius dubitus	Plethodontidae	11.8	2
Thorius troglodytes	Thorius troglodytes	Plethodontidae	11.7	2
Pseudoeurycea altamontana	Pseudoeurycea altamontana	Plethodontidae	9.6	2
Rana boylli	Rana boylii	Ranidae					34	13
Rana cascadae	Rana cascadae	Ranidae			-1	13	33.6	13
Rana catesbeiana	Rana catesbeiana	Ranidae					33.6	13
Rana clamitans	Rana clamitans	Ranidae					35	13
Hylarana erythraea	Rana erythraea	Ranidae					34.8	15
Hylarana luzonensis	Rana luzonensis	Ranidae					34.1	15
Rana palmipes	Rana palmipes	Ranidae			-1	13	36.9	13
Rana palustris	Rana palustris	Ranidae					31.3	13
Rana pipiens	Rana pipiens	Ranidae			-1.6	13	35.2	13
Rana pretiosa	Rana pretiosa	Ranidae					34.8	13
Rana sylvaticus	Rana sylvatica	Ranidae			0.5	53	36	53
Rana virgatipes	Rana virgatipes	Ranidae					38	54
Rana warszewitschii	Rana warszewitschii	Ranidae			4.8	13	32.8	13
Philautus surdus	Philautus surdus	Rhacophoridae					33.6	15
Rhyacotriton olympicus	Rhyacotriton olympicus	Rhyacotritonidae	7.97273	28, 55
Notophthalmus viridescens	Notophthalmus viridescens	Salamandridae	18.4	3, 56			37.3	39
Salamandra salamandra	Salamandra salamandra	Salamandridae	14.5	57
Taricha granulosa	Taricha granulosa	Salamandridae	10.1	3, 58
Taricha torosa	Taricha torosa	Salamandridae	15.25	59			38	60
Spea holbrooki	Scaphiopus holbrookii	Scaphiopodidae					34	13
Spea hammondi	Spea hammondii	Scaphiopodidae			0	13	40.3	13
Pseudobranchus striatus	Pseudobranchus striatus	Sirenidae	24	3, 61

## Sheet: Squamates
Species	Species name in tree	Family	Tb	Tb-References	CTmin	CTMin-References	CTmax	CTmax-References
Agama agama	Agama agama	Agamidae	36.0667	62-64
Agama hispida	Agama hispida	Agamidae	36.6	65
Amphibolurus muricatus	Amphibolurus muricatus	Agamidae	36	67, 68	3	69	42.3	69
Calotes versicolor	Calotes versicolor	Agamidae	27.5	72
Chlamydosaurus kingii	Chlamydosaurus kingii	Agamidae	36.7	73
Ctenophorus caudicinctus	Ctenophorus caudicinctus	Agamidae	38.5667	71
Ctenophorus cristatus	Ctenophorus cristatus	Agamidae					43	74
Ctenophorus decresii	Ctenophorus decresii	Agamidae			7	69	43.8	69
Ctenophorus fordi	Ctenophorus fordi	Agamidae					45	75
Ctenophorus isolepis	Ctenophorus isolepis	Agamidae	40.7	76
Amphibolurus maculatus	Ctenophorus maculatus	Agamidae	37	67
Ctenophorus maculosus	Ctenophorus maculosus	Agamidae					48.9	77
Amphibolurus reticulatus	Ctenophorus nuchalis	Agamidae	39.8143	70, 71			48.5	70
Ctenophorus pictus	Ctenophorus pictus	Agamidae					45	74
Ctenophorus reticulatus	Ctenophorus reticulatus	Agamidae					46.5	74
Ctenophorus scutulatus	Ctenophorus scutulatus	Agamidae	38.2	67
Draco volans	Draco volans	Agamidae	30.6	78
Hypsilurus spinipes	Hypsilurus spinipes	Agamidae	19	79
Lophognathus gilberti	Lophognathus gilberti	Agamidae			2.7	69	41.8	69
Lophognathus longirostris	Lophognathus longirostris	Agamidae	37.1	67
Moloch horridus	Moloch horridus	Agamidae	33.7	67, 81	3.5	69	42.5	69
Phrynocephalus helioscopus	Phrynocephalus helioscopus	Agamidae	33.1	82
Phrynocephalus interscapularis	Phrynocephalus interscapularis	Agamidae	32.4	82
Phrynocephalus mystaceus	Phrynocephalus mystaceus	Agamidae	32.3	82
Pogona barbata	Pogona barbata	Agamidae	34.525	67, 83
Rankinia diemensis	Rankinia diemensis	Agamidae			3.1	69	44.8	69
Laudakia stellio	Stellagama stellio	Agamidae			11.9	80	44.7	80
Trapelus sanguinolentus	Trapelus sanguinolentus	Agamidae	35.4	82
Trapelus savignii	Trapelus savignii	Agamidae			12	80	47.2	80
Uromastyx ornata	Uromastyx ornata	Agamidae	36.5	84
Amphisbaena mertensi	Amphisbaena mertensii	Amphisbaenidae	23.6	85
Anguis fragilis	Anguis fragilis	Anguidae	22.55	87, 88
Elgaria coerulea	Elgaria coerulea	Anguidae	25.3667	89, 90			39.2	66
Elgaria multicarinata	Elgaria multicarinata	Anguidae	24.7	91, 92	2.2	91	40.85	66, 91
Ophisaurus attenuatus	Ophisaurus attenuatus	Anguidae	32	66
Anniella pulchra	Anniella pulchra	Annielliidae	22.3	66, 93			34	66
Blanus cinerus	Blanus cinereus	Blanidae	23.6	86
Charina bottae	Charina bottae	Boidae	14.8	66			38	66
Nephrurus laevissimus	Nephrurus laevissimus	Carphodactylidae	22.5	94
Nephrurus levis	Nephrurus levis	Carphodactylidae	19.15	67, 94
Nephurus stellatus	Nephrurus stellatus	Carphodactylidae	24.2	95
Nephrurus vertebralis	Nephrurus vertebralis	Carphodactylidae	24.1	94
Nephrurus milii	Underwoodisaurus milii	Carphodactylidae	28.75	67, 95
Bradypodion pumilum	Bradypodion pumilum	Chamaeleonidae	30.05	96, 97
Chamaeleo africanus	Chamaeleo africanus	Chamaeleonidae	24.7	98
Chamaeleo calyptratus	Chamaeleo calyptratus	Chamaeleonidae	32.9	100
Chamaeleo chamaeleo	Chamaeleo chamaeleon	Chamaeleonidae	29.75	98, 101
Chamaeleo dilepis	Chamaeleo dilepis	Chamaeleonidae	31.2	66, 99	7.6	99	43.6	99
Chamaeleo namaquensis	Chamaeleo namaquensis	Chamaeleonidae	32.2	66, 97
Chionactis occipitalis	Chionactis occipitalis	Chamaeleonidae	27.9	66	.		37	66
Furcifer pardalis	Furcifer pardalis	Chamaeleonidae	32	102
Chamaeleo bitaeniatus	Trioceros bitaeniatus	Chamaeleonidae	28.9	99	4.4	99	42.2	99
Chamaeleo ellioti	Trioceros ellioti	Chamaeleonidae	32	99	3.5	99	41.8	99
Chamaeleo hoehnelii	Trioceros hoehnelii	Chamaeleonidae	29.25	96, 99	5.1	99	40.8	99
Chamaeleo jacksonii	Trioceros jacksonii	Chamaeleonidae	30.4	99	5.3	99	41	99
Trioceros schubotzi	Trioceros schubotzi	Chamaeleonidae	22.2	99	1.4	99	41.6	99
Arizona elegans	Arizona elegans	Colubridae	27	66			41.8	66
Carphophis amoenus	Carphophis amoenus	Colubridae	26.4	66
Coluber constrictor	Coluber constrictor	Colubridae	29.6	66			42.4	66
Masticophis flagellum	Coluber flagellum	Colubridae	31.6	66			42.4	66
Contia tenuis	Contia tenuis	Colubridae	19.5	66
Diadophis punctatus	Diadophis punctatus	Colubridae	28	66
Hypsiglena torquata	Hypsiglena torquata	Colubridae	29.4667	66
Lampropeltis doliata	Lampropeltis elapsoides	Colubridae	26.2	66
Lampropeltis getulus	Lampropeltis getula	Colubridae	28.1	66			42	66
Lampropeltis zonata	Lampropeltis zonata	Colubridae	27.5	66			42.5	66
Natrix erythrogaster	Nerodia erythrogaster	Colubridae	29	66
Natrix rhombifera	Nerodia rhombifer	Colubridae	26.9	66
Natrix sipedon	Nerodia sipedon	Colubridae	24.84	66
Elaphe obsoleta	Pantherophis obsoletus	Colubridae	28	66
Pituophis catenifer	Pituophis catenifer	Colubridae	26.7	66			40.5	66
Regina alleni	Regina alleni	Colubridae					41.6	66
Rhinocheilus lecontei	Rhinocheilus lecontei	Colubridae	25.2	66			41.5	66
Storeria occipitomaculata	Storeria occipitomaculata	Colubridae					37.8	66
Thamnophis butleri	Thamnophis butleri	Colubridae	26.1	66	5.8	103
Thamnophis elegans	Thamnophis elegans	Colubridae	25.7	66	2	129, 352	43.1	353
Thamnophis marcianus	Thamnophis marcianus	Colubridae			5.7	103
Thamnophis melanogaster	Thamnophis melanogaster	Colubridae			6.1	103
Thamnophis ordinoides	Thamnophis ordinoides	Colubridae	29	66	3.8	104	38.3	104
Thamnophis radix	Thamnophis radix	Colubridae	...		4.6	103	41	66
Thamnophis sauritus	Thamnophis sauritus	Colubridae	26	66
Thamnophis sirtalis	Thamnophis sirtalis	Colubridae	25.6	66	3.4	104	39.2	104
Tropidoclonion lineatum	Tropidoclonion lineatum	Colubridae	30.5	66
Cordylus cordylus	Cordylus cordylus	Cordylidae	30.05	106, 107	7.5	107	41.6	107
Cordylus jonesii	Cordylus jonesii	Cordylidae	33.5	108
Cordylus macropholis	Cordylus macropholis	Cordylidae	29.4	108
Cordylus niger	Cordylus niger	Cordylidae	32.4	106	7.4	107	41	107
Cordylus oelofseni	Cordylus oelofseni	Cordylidae	33.8	106	6.3	107	40.8	107
Cordylus vittifer	Cordylus vittifer	Cordylidae	32.1	108
Cordylus polyzonus	Karusasaurus polyzonus	Cordylidae	33.1	106
Cordylus cataphractus	Ouroborus cataphractus	Cordylidae	32	105
Platysaurus intermedius	Platysaurus intermedius	Cordylidae	31.5	106	8.8	109	44.8	109
Pseudocordylus melanotus	Pseudocordylus melanotus	Cordylidae	28.9	110	10.2	111
Basiliscus basiliscus	Basiliscus basiliscus	Corytophanidae	26	66
Basiliscus plumifrons	Basiliscus plumifrons	Corytophanidae	31.7	112
Basiliscus vittatus	Basiliscus vittatus	Corytophanidae	35	66			43.1	113
Crotaphytus collaris	Crotaphytus collaris	Crotaphytidae	36.4333	66, 114-116			46.5	117
Gambelia sila	Gambelia sila	Crotaphytidae	38	66, 118
Crotaphytus wislizeni	Gambelia wislizenii	Crotaphytidae	37.95	66, 91, 118, 119	11.6	120
Anolis allisoni	Anolis allisoni	Dactyloidae	33	66
Anolis allogus	Anolis allogus	Dactyloidae	29.2	66
Anolis auratus	Anolis auratus	Dactyloidae	31.8	146, 272			40	272
Anolis bahorucoensis	Anolis bahorucoensis	Dactyloidae	25.25	273, 274
Anolis barbatus	Anolis barbatus	Dactyloidae	28.6	275
Anolis barbouri	Anolis barbouri	Dactyloidae	26.3	276	11.7	276	34.9	276
Anolis bonairensis	Anolis bonairensis	Dactyloidae	33.4	277
Anolis capito	Anolis capito	Dactyloidae	28.8	278
Anolis carolinensis	Anolis carolinensis	Dactyloidae	30.4	66, 279	7.25	121, 280	41.6	66, 121, 280
Anolis chrysolepis	Anolis chrysolepis	Dactyloidae	27.9	281
Anolis cooki	Anolis cooki	Dactyloidae	32.8833	65, 282	9.3	185	38.8	185
Anolis cristatellus	Anolis cristatellus	Dactyloidae	30.1769	274, 279, 282-284	11.8	121	38.4	121
Anolis cupreus	Anolis cupreus	Dactyloidae
Anolis cybotes	Anolis cybotes	Dactyloidae	29.9125	155, 273, 274			39	155
Anolis distichus	Anolis distichus	Dactyloidae	29	273, 274, 279, 285			38.6	286
Anolis equestris	Anolis equestris	Dactyloidae	30.7	168
Anolis evermanni	Anolis evermanni	Dactyloidae					38.9	153
Anolis frenatus	Anolis frenatus	Dactyloidae	29.7	272			35.7	272
Anolis fuscoauratus	Anolis fuscoauratus	Dactyloidae	28.7	287
Anolis gingivinus	Anolis gingivinus	Dactyloidae	30.1	288
Anolis grahami	Anolis grahami	Dactyloidae	31.2	279
Anolis gundlachi	Anolis gundlachi	Dactyloidae	24.4375	283, 284	6.3	185	35.7	283
Anolis homolechis	Anolis homolechis	Dactyloidae	31.8	66
Anolis humilis	Anolis humilis	Dactyloidae			12.4	121	35.6	121
Anolis intermedius	Anolis intermedius	Dactyloidae			11.1	121	38.4	121
Anolis krugi	Anolis krugi	Dactyloidae					36	154
Anolis lemurinus	Anolis lemurinus	Dactyloidae	26.4	121	12.9	121	37.3	121
Anolis limifrons	Anolis limifrons	Dactyloidae	26.4	272	12.3	289	36.8	289
Anolis lineatopis	Anolis lineatopus	Dactyloidae	27.9	279, 290
Anolis lionotus	Anolis lionotus	Dactyloidae			14.7	121	36.7	121
Anolis longiceps	Anolis longiceps	Dactyloidae	32.2	291
Anolis longitibialis	Anolis longitibialis	Dactyloidae	32.2	155
Anolis lucius	Anolis lucius	Dactyloidae	29.3	66
Anolis marcanoi	Anolis marcanoi	Dactyloidae					40.5	155, 156
Anolis marmoratus	Anolis marmoratus	Dactyloidae	30.4333	292
Anolis monensis	Anolis monensis	Dactyloidae	30.9	279, 293
Anolis occulatus	Anolis occultus	Dactyloidae	28.2	294
Anolis oculatus	Anolis oculatus	Dactyloidae	27.875	295			35.5	294
Anolis olssoni	Anolis olssoni	Dactyloidae	33.2	296
Anolis polylepis	Anolis polylepis	Dactyloidae	27.3	297
Anolis pulchellus	Anolis pulchellus	Dactyloidae					36.1	154
Anolis punctatus	Anolis punctatus	Dactyloidae	29.1	287, 298
Anolis roquet	Anolis roquet	Dactyloidae					35.9	157
Anolis sagrei	Anolis sagrei	Dactyloidae	31.9923	66, 279, 285			40.5	286
Anolis semilineatus	Anolis semilineatus	Dactyloidae	32.3	296			39.6	296
Anolis shrevei	Anolis shrevei	Dactyloidae	29.2	155			40.1	155
Anolis stratulus	Anolis stratulus	Dactyloidae					41.2	153
Anolis trachyderma	Anolis trachyderma	Dactyloidae	27.8	299
Anolis transversalis	Anolis transversalis	Dactyloidae	27.6	287
Anolis tropidogaster	Anolis tropidogaster	Dactyloidae	27.6	272			33.4	272
Anolis uniformis	Anolis uniformis	Dactyloidae	27.9	300
Diplodactylus conspicillatus	Diplodactylus conspicillatus	Diplodactylidae	31	67, 94
Diplodactylus pulcher	Diplodactylus pulcher	Diplodactylidae	27.7	94
Oedura reticulata	Hesperoedura reticulata	Diplodactylidae	29.4	95
Hoplodactylus duvaucelii	Hoplodactylus duvaucelii	Diplodactylidae	16.9	122
Lucasium stenodactylum	Lucasium stenodactylum	Diplodactylidae	26.6	94
Naultinus manukanus	Naultinus manukanus	Diplodactylidae	23.8	122
Naultinus rudis	Naultinus rudis	Diplodactylidae	29.6	122
Naultinus stellatus	Naultinus stellatus	Diplodactylidae	22.9	122
Oedura marmorata	Oedura marmorata	Diplodactylidae	31.9	95
Opheodrys vernalis	Opheodrys vernalis	Diplodactylidae	25.6	66
Rhynchoedura ornata	Rhynchoedura ornata	Diplodactylidae	30.7	67, 94
Strophurus ciliaris	Strophurus ciliaris	Diplodactylidae	25.4	94
Strophurus elderi	Strophurus elderi	Diplodactylidae	26.2	94
Strophurus spinigerus	Strophurus spinigerus	Diplodactylidae	29.5	67, 95
Strophurus strophurus	Strophurus strophurus	Diplodactylidae	25.3	94, 122
Hoplodactylus maculatus	Woodworthia maculatus	Diplodactylidae	23.5667	122, 123	1.2	124
Austrelaps superbus	Austrelaps superbus	Elapidae			3	69	41.2	69
Hemachatus haemachatus	Hemachatus haemachatus	Elapidae			3.7	125	43.1	125
Notechis scutatus	Notechis scutatus	Elapidae			2.2	69	38	69
Pseudechis porphyriacus	Pseudechis porphyriacus	Elapidae			3	126
Pseudonaja textilis	Pseudonaja textilis	Elapidae			3.5	69	42.4	69
Coleonyx brevis	Coleonyx brevis	Eublepharidae	29.3333	66, 127, 128	8.5	129	41.6	129
Coleonyx elegans	Coleonyx elegans	Eublepharidae	23.8	128
Coleonyx mitratus	Coleonyx mitratus	Eublepharidae	25.3	95
Coleonyx variegatus	Coleonyx variegatus	Eublepharidae	26.3	66, 128, 130	7.6	129	43	129
Eublepharis macularius	Eublepharis macularius	Eublepharidae	27.65	95, 131
Goniurosaurus kuroiwae	Goniurosaurus kuroiwae	Eublepharidae	19.15	131
Hemitheconyx caudicinctus	Hemitheconyx caudicinctus	Eublepharidae	25.8	128
Chondrodactylus angulifer	Chondrodactylus angulifer	Gekkonidae	26.2	66			42.9	132
Chondrodactylus bibronii	Chondrodactylus bibronii	Gekkonidae	32	133			42.7	132
Christinus marmoratus	Christinus marmoratus	Gekkonidae	26.675	67, 95, 134
Cyrtodactylus philippinicus	Cyrtodactylus philippinicus	Gekkonidae					34.6	15
Gehyra variegata	Gehyra variegata	Gekkonidae	29.85	67, 94, 95	6	69	43.8	69
Hemidactylus frenatus	Hemidactylus frenatus	Gekkonidae	28.4	136	11.9	129	42.4	129
Hemidactylus mabouia	Hemidactylus mabouia	Gekkonidae	34.5	137
Hemidactylus turcicus	Hemidactylus turcicus	Gekkonidae	27.8	95	10.5	129	41.1	129
Heteronotia binoei	Heteronotia binoei	Gekkonidae	31.15	67, 94	9.6	69	40.6	69
Lepidodactylus lugubris	Lepidodactylus lugubris	Gekkonidae	31.75	138	11.5	129	40.2	129
Lygodactylus klugei	Lygodactylus klugei	Gekkonidae	34	139
Cyrtopodion kotschyi	Mediodactylus kotschyi	Gekkonidae	30.7	135
Phelsuma madagascariensis	Phelsuma madagascariensis	Gekkonidae	33.2	140
Rhoptropus afer	Rhoptropus afer	Gekkonidae	32.7	122
Gerrhosaurus major	Broadleysaurus major	Gerrhosauridae	31.8	143
Gerrhosaurus flavigularis	Gerrhosaurus flavigularis	Gerrhosauridae	33.3	66
Gerrhosaurus nigrolineatus	Gerrhosaurus nigrolineatus	Gerrhosauridae	33.2	63
Gerrhosaurus skoogi	Gerrhosaurus skoogi	Gerrhosauridae	30	133
Alopoglossus angulatus	Alopoglossus angulatus	Gymnophthalmidae	25.1	144
Alopoglossus atriventris	Alopoglossus atriventris	Gymnophthalmidae	26.1	144
Cercosaura eigenmanni	Cercosaura eigenmanni	Gymnophthalmidae	28.55	145
Micrablepharus maximiliani	Micrablepharus maximiliani	Gymnophthalmidae	29.1	146
Potamites ecpleopus	Potamites ecpleopus	Gymnophthalmidae	27.175	147, 148
Potamites juruazensis	Potamites juruazensis	Gymnophthalmidae	26.1	149
Heloderma horridum	Heloderma horridum	Helodermatidae	30.2	150
Heloderma suspectum	Heloderma suspectum	Helodermatidae	29.4	151			42.5	66
Amblyrhynchus cristatus	Amblyrhynchus cristatus	Iguanidae	35.4	66, 152
Conolophus pallidus	Conolophus pallidus	Iguanidae	35.25	66, 158
Conolophus subcristatus	Conolophus subcristatus	Iguanidae	36.5	159
Cyclura nubila	Cyclura nubila	Iguanidae	38.6	160
Dipsosaurus dorsalis	Dipsosaurus dorsalis	Iguanidae	40	66, 118, 161, 162	14	163	47.5	118
Iguana iguana	Iguana iguana	Iguanidae	35.8	164, 165			46.7	66
Sauromalus obesus	Sauromalus ater	Iguanidae	37.1	66, 168			45.6	66
Acanthodactylus boskianus	Acanthodactylus boskianus	Lacertidae	36.975	169, 170
Acanthodactylus erythrurus	Acanthodactylus erythrurus	Lacertidae	33.5	171			46.3	172
Acanthodactylus paradis	Acanthodactylus pardalis	Lacertidae	360	169
Acanthodactylus schreiberi	Acanthodactylus schreiberi	Lacertidae	40.2	169
Acanthodactyus scutellatus	Acanthodactylus scutellatus	Lacertidae	39.2	169
Archaeolacerta bedriagae	Archaeolacerta bedriagae	Lacertidae	32.8	173
Dalmatolacerta oxycephala	Dalmatolacerta oxycephala	Lacertidae	31.6	174
Eremias prezwalskii	Eremias przewalskii	Lacertidae	30.4	175
Gallottia galloti	Gallotia galloti	Lacertidae	33.5	176
Gallotia simonyi	Gallotia simonyi	Lacertidae	33.2	176
Heliobolus lugubris	Heliobolus lugubris	Lacertidae	37.7	65
Heliobolus spekii	Heliobolus spekii	Lacertidae	36.8	63
Iberolacerta monticola	Iberolacerta monticola	Lacertidae	31.8	57			43.6	172
Lacerta agilis	Lacerta agilis	Lacertidae	34.2	66	5.9	177	43.9	172
Lacerta schreiberi	Lacerta schreiberi	Lacertidae					43	172
Lacerta viridis	Lacerta viridis	Lacertidae	32.4	178
Latastia longicaudata	Latastia longicaudata	Lacertidae	37.8	63
Meroles anchietae	Meroles anchietae	Lacertidae	30	133
Meroles suborbitalis	Meroles suborbitalis	Lacertidae	37.15	66			46	132
Nucrus tessallata	Nucras tessellata	Lacertidae	39.3	65
Eremias lineoocellata	Pedioplanis lineoocellata	Lacertidae	37.65	65, 66			45.6	132
Eremias namaquensis	Pedioplanis namaquensis	Lacertidae	38.15	65, 66
Podarcis bocagei	Podarcis bocagei	Lacertidae					45.4	172
Podarcis hispanicus	Podarcis hispanicus	Lacertidae	33.325	57, 179-181			44.45	180
Podarcis lilfordi	Podarcis lilfordi	Lacertidae					43.3	172
Podarcis melisellensis	Podarcis melisellensis	Lacertidae	34.1	174
Podarcis milensis	Podarcis milensis	Lacertidae	31.3	182
Podarcis muralis	Podarcis muralis	Lacertidae	33.65	183, 184	5.9	185	44.2	172
Podarcis siculus	Podarcis siculus	Lacertidae	35.2	183
Podarcis tiliguerta	Podarcis tiliguerta	Lacertidae	32.5	186			42.7	186
Psammodromus algirus	Psammodromus algirus	Lacertidae	33.3	57, 171, 187	7	185	43.5	172
Psammodromus hispanicus	Psammodromus hispanicus	Lacertidae			8.8	185	45.5	172
Takydromus formosanus	Takydromus formosanus	Lacertidae			5	188	43.3	188
Takydromus hsuehshanensis	Takydromus hsuehshanensis	Lacertidae			2	189	44.1	189
Takydromus septentrionalis	Takydromus septentrionalis	Lacertidae	32.925	190, 191	4.9	190	45	190
Takydromus sexlineatus	Takydromus sexlineatus	Lacertidae			6.4	192	43.2	192
Takydromus stejnegeri	Takydromus stejnegeri	Lacertidae			5	188	43.2	188
Teira dugesii	Teira dugesii	Lacertidae	35	193
Zootoca vivipara	Zootoca vivipara	Lacertidae	30.125	194-197	2.2	198	44.1	198
Eremias argus	Eremias argus	Lacertidae	36	199	1	200	44.9	200
Eremias brenchleyi	Eremias brenchleyi	Lacertidae	35.3	199, 201	3.4	202	43.6	202
Eremias multiocellata	Eremias multiocellata	Lacertidae	35.4	199	9	199	41.1	199
Lanthanotus borneensis	Lanthanotus borneensis	Lanthanotidae	28	203
Leiocephalus schreibersii	Leiocephalus schreibersii	Leiocephalidae	36.3	204
Pristidactylus torquatus	Pristidactylus torquatus	Leiosauridae	29	301
Liolaemus abaucan	Liolaemus abaucan	Liolaemidae	33.8	205	15.41	167	47.3	167
Liolaemus albiceps	Liolaemus albiceps	Liolaemidae	32.9	205	7.05	167	44.33	167
Liolaemus austromendocinus	Liolaemus austromendocinus	Liolaemidae	35	205
Liolaemus belli	Liolaemus bellii	Liolaemidae	33.98	205-207
Liolaemus bibronii	Liolaemus bibronii	Liolaemidae	30.1667	205, 208	8.49	167	44.53	167
Liolaemus bitaeniatus	Liolaemus bitaeniatus	Liolaemidae	32.1	205
Liolaemus boulengeri	Liolaemus boulengeri	Liolaemidae	35.7	205	9.4	167	43.99	167
Liolaemus buergeri	Liolaemus buergeri	Liolaemidae	34.7	205
Liolaemus canqueli	Liolaemus canqueli	Liolaemidae	33.6	205	6.99	167	44.6	167
Liolaemus capillitas	Liolaemus capillitas	Liolaemidae			7.47	167	43.7	167
Liolaemus chacoensis	Liolaemus chacoensis	Liolaemidae			14.9	167	44.1	167
Liolaemus chaltin	Liolaemus chaltin	Liolaemidae	32.3	205
Liolaemus chiliensis	Liolaemus chiliensis	Liolaemidae	34.1	207, 209	3.68	209
Liolaemus hernani	Liolaemus curicensis	Liolaemidae			11.64	166
Liolaemus cuyanus	Liolaemus cuyanus	Liolaemidae	37.7	205	12	167	45.7	167
Liolaemus cyanogaster	Liolaemus cyanogaster	Liolaemidae			12.25	166
Liolaemus darwinii	Liolaemus darwinii	Liolaemidae	36.4	205	10.11	167	44.68	167
Liolaemus dicktracyi	Liolaemus dicktracyi	Liolaemidae	35.9	205
Liolaemus dorbignyi	Liolaemus dorbignyi	Liolaemidae	35.9	205	8.83	167	43.91	167
Liolaemus cf elongatus	Liolaemus elongatus	Liolaemidae	32.075	205, 219, 375	7.68	167	45.1	167
Liolaemus fabiani	Liolaemus fabiani	Liolaemidae	31.28	205	11.33	210
Liolaemus fitzingerii	Liolaemus fitzingerii	Liolaemidae	33.4	205	8.24	167	44.45	167
Liolaemus fuscus	Liolaemus fuscus	Liolaemidae	34.875	211-213	3.9	209
Liolaemus gracilis	Liolaemus gracilis	Liolaemidae	40.8	205
Liolaemus grosseorum	Liolaemus grosseorum	Liolaemidae	37.3	205
Liolaemus huacahuasicus	Liolaemus huacahuasicus	Liolaemidae	31.75	205, 214
Liolaemus irregularis	Liolaemus irregularis	Liolaemidae	35.5	205	6.96	167	44.98	167
Liolaemus kingii	Liolaemus kingii	Liolaemidae	30.8	205	7.01	167	44.5	167
Liolaemus koslowskyi	Liolaemus koslowskyi	Liolaemidae	35.5	205	13.22	167	46.1	167
Liolaemus kriegi	Liolaemus kriegi	Liolaemidae			7.6	167	43.67	167
Liolaemus laurenti	Liolaemus laurenti	Liolaemidae	35.9	205	12.2	167	46.18	167
Liolaemus lemniscatus	Liolaemus lemniscatus	Liolaemidae	34.975	207, 211, 212	5.95	209
Liolaemus leopardinus	Liolaemus leopardinus	Liolaemidae	34.1	207	3.3	209
Liolaemus lutzae	Liolaemus lutzae	Liolaemidae	33.9	205
Liolaemus magellanicus	Liolaemus magellanicus	Liolaemidae	27	215
Liolaemus melanops	Liolaemus melanops	Liolaemidae	36.6	205	5.65	167	44.94	167
Liolaemus monticola	Liolaemus monticola	Liolaemidae	35.8	207, 211, 212	4.54	209
Liolaemus multicolor	Liolaemus multicolor	Liolaemidae	31.6	205	8.06	167	44.7	167
Liolaemus multimaculatus	Liolaemus multimaculatus	Liolaemidae			8.93	167	43.83	167
Liolaemus nigromaculatus	Liolaemus nigromaculatus	Liolaemidae	34.8	211	8.4	166
Liolaemus nigroviridis	Liolaemus nigroviridis	Liolaemidae	35.7	206, 207	2.63	209
Liolaemus nitidus	Liolaemus nitidus	Liolaemidae	35.15	206, 207, 213	3.6	209
Liolaemus occipitalis	Liolaemus occipitalis	Liolaemidae	32.4	216
Liolaemus olongasta	Liolaemus olongasta	Liolaemidae	32.1	217	11.85	167	44.58	167
Liolaemus ornatus	Liolaemus ornatus	Liolaemidae	30.7	218	6.91	166
Liolaemus petrophilus	Liolaemus petrophilus	Liolaemidae	34.4	205	7.31	167	45.23	167
Liolaemus pictus	Liolaemus pictus	Liolaemidae	33.32	206, 207, 213, 219	8.47	166
Liolaemus platei	Liolaemus platei	Liolaemidae	36.1	211	11.98	166
Liolaemus pseudoanomalus	Liolaemus pseudoanomalus	Liolaemidae	33.7	205, 220	12.19	167	45.93	167
Liolaemus pseudolemniscatus	Liolaemus pseudolemniscatus	Liolaemidae			11.08	166
Liolaemus puna	Liolaemus puna	Liolaemidae	33.3	205
Liolaemus quilmes	Liolaemus quilmes	Liolaemidae	34.3	205	8.46	167	44.69	167
Liolaemus ramirezae	Liolaemus ramirezae	Liolaemidae	32.2	205
Liolaemus riojanus	Liolaemus riojanus	Liolaemidae			10.7	167	45.2	167
Liolaemus robertmertensi	Liolaemus robertmertensi	Liolaemidae	36.6	205	14.07	167	43	167
Liolaemus rothi	Liolaemus rothi	Liolaemidae	36.6	205	5.5	167	43.8	167
Liolaemus ruibali	Liolaemus ruibali	Liolaemidae	28.65	205, 220
Liolaemus scapularis	Liolaemus scapularis	Liolaemidae	36.2	205	9.39	167	45.57	167
Liolaemus schroederi	Liolaemus schroederi	Liolaemidae	33.375	206, 207, 213	5.4	209
Liolaemus telsen	Liolaemus telsen	Liolaemidae			8.98	167	44.6	167
Liolaemus tenuis	Liolaemus tenuis	Liolaemidae	36.35	206, 207, 212	4.16	209
Liolaemus umbrifer	Liolaemus umbrifer	Liolaemidae	33.1	205
Liolaemus uspallatensis	Liolaemus uspallatensis	Liolaemidae	35.7	205
Liolaemus vallecurensis	Liolaemus vallecurensis	Liolaemidae			8.2	166
Liolaemus walkeri	Liolaemus walkeri	Liolaemidae			12.9	166
Liolaemus xanthoviridis	Liolaemus xanthoviridis	Liolaemidae	33.9	205	7.86	167	44.48	167
Phymaturus antofagastensis	Phymaturus antofagastensis	Liolaemidae	34.9	205	11.8	167	41.4	167
Phymaturus indistinctus	Phymaturus indistinctus	Liolaemidae	34.1	205	7	167	44.7	167
Phymaturus palluma	Phymaturus palluma	Liolaemidae	34.2	205	11.5	167	44.6	167
Phymaturus patagonicus	Phymaturus patagonicus	Liolaemidae			9.8	375	39.9	375
Phymaturus somuncurensis	Phymaturus somuncurensis	Liolaemidae	32.8	205	5.7	167	42.8	167
Oplurus cuvieri	Oplurus cuvieri	Opluridae	36.7	221, 222
Oplurus cyclurus	Oplurus cyclurus	Opluridae	39.8	168
Callisaurus draconoides	Callisaurus draconoides	Phrynosomatidae	38.8769	66, 130, 223-226			39.2	227
Cophosaurus texanus	Cophosaurus texanus	Phrynosomatidae	36.425	66, 223, 228	15.4	228	44.4	228
Holbrookia maculata	Holbrookia maculata	Phrynosomatidae	35.9333	66, 229			46.5	230
Holbrookia propinqua	Holbrookia propinqua	Phrynosomatidae	37.9	231
Petrosaurus mearnsi	Petrosaurus mearnsi	Phrynosomatidae	36	66			42.6	232
Petrosaurus thalissinus	Petrosaurus thalassinus	Phrynosomatidae	35.825	66, 233
Anota coronatum	Phrynosoma blainvillii	Phrynosomatidae	35.4	66			45.1	66
Phrynosoma cornutum	Phrynosoma cornutum	Phrynosomatidae	37.15	66, 162, 234	9.46	234	47.91	234
Phrynosoma coronatum	Phrynosoma coronatum	Phrynosomatidae	35.2667	66, 130, 162			46.7	66
Phrynosoma douglassii	Phrynosoma douglassii	Phrynosomatidae	35.32	66, 162, 234-236	2.75	234	43.5	234
Phrynosoma mcalli	Phrynosoma mcallii	Phrynosomatidae	37.4	66
Doliosaurus modestum	Phrynosoma modestum	Phrynosomatidae	33.55	162
Doliosaurus platyrhinos	Phrynosoma platyrhinos	Phrynosomatidae	35.45	66, 162			45.5	117
Anota solare	Phrynosoma solare	Phrynosomatidae	34.7	162
Sceloporus aeneus	Sceloporus aeneus	Phrynosomatidae	33.25	237, 238
Sceloporus bicanthalis	Sceloporus bicanthalis	Phrynosomatidae	30.55	239
Sceloporus consobrinus	Sceloporus consobrinus	Phrynosomatidae	35.8	240
Sceloporus cyanogenys	Sceloporus cyanogenys	Phrynosomatidae	29.4	241
Sceloporus gadoviae	Sceloporus gadoviae	Phrynosomatidae	35.1	239
Sceloporus g. vandenburgianus	Sceloporus graciosus	Phrynosomatidae	37.45	66	6.95	124, 243	45	66
Sceloporus grammicus	Sceloporus grammicus	Phrynosomatidae	32.35	239			41.8	244
Sceloporus grandaveus	Sceloporus grandaevus	Phrynosomatidae	35.5	233
Sceloporus horridus	Sceloporus horridus	Phrynosomatidae	37.5	239
Sceloporus jarrovi	Sceloporus jarrovii	Phrynosomatidae	33.0444	66, 239, 245, 246	-3.7	124
Sceloporus magister	Sceloporus magister	Phrynosomatidae	35.5	66, 240, 247, 248			43	66
Sceloporus f. malachiticus	Sceloporus malachiticus	Phrynosomatidae	31.6	239, 240, 242	9.7	121	42.8	121
Sceloporus merriami	Sceloporus merriami	Phrynosomatidae	34.75	240, 249	14.1	185	42.3	250
Sceloporus mucronatus	Sceloporus mucronatus	Phrynosomatidae	29.2	239, 251
Sceloporus occidentalis	Sceloporus occidentalis	Phrynosomatidae	33.9857	66, 89, 130, 251-253	4.8	121	44.1	121
Sceloporus ochoteranae	Sceloporus ochoterenae	Phrynosomatidae	33.7	239
Sceloporus olivaceus	Sceloporus olivaceus	Phrynosomatidae	34.6667	66, 239, 254
Sceloporus orcutti	Sceloporus orcutti	Phrynosomatidae	33.3333	64, 66, 130, 233, 255
Sceloporus paliciosi	Sceloporus palaciosi	Phrynosomatidae	30.2	238
Sceloporus poinsetti	Sceloporus poinsettii	Phrynosomatidae	32.7333	240, 251
Sceloporus scalaris	Sceloporus scalaris	Phrynosomatidae	34.925	239, 256			44.7	256
Sceloporus serrifer	Sceloporus serrifer	Phrynosomatidae	31	251
Sceloporus siniferus	Sceloporus siniferus	Phrynosomatidae	36.2	257
Sceloporus squamosus	Sceloporus squamosus	Phrynosomatidae	35.3	239
Sceloporus torquatus	Sceloporus torquatus	Phrynosomatidae	33	251
Sceloporus undulatus	Sceloporus undulatus	Phrynosomatidae	34.3059	229, 240, 253, 258-262	11.4	262	42.125	117, 258, 262
Sceloporus olloporus	Sceloporus variabilis	Phrynosomatidae	35.2	240	10.2	121	43.1	66
Sceloporus virgatus	Sceloporus virgatus	Phrynosomatidae	34	263
Sceloporus woodi	Sceloporus woodi	Phrynosomatidae	36.2	240			44.2	66
Uma exsul	Uma exsul	Phrynosomatidae	35.45	251
Uma inornata	Uma inornata	Phrynosomatidae	37	264			45	118
Uma notata	Uma notata	Phrynosomatidae	38.6	66
Uma paraphygas	Uma paraphygas	Phrynosomatidae	35.5	251
Uma scoparia	Uma scoparia	Phrynosomatidae	36.5	66, 162
Urosaurus auriculatus	Urosaurus auriculatus	Phrynosomatidae	36.3	66			43.1	66
Urosaurus clarionensis	Urosaurus clarionensis	Phrynosomatidae	36.4	66			41.8	66
Urosaurus graciosus	Urosaurus graciosus	Phrynosomatidae	37.6	247
Urosaurus nigricaudus	Urosaurus nigricaudus	Phrynosomatidae	35.325	66, 233
Urosaurus ornatus	Urosaurus ornatus	Phrynosomatidae	35.64	66, 247, 265			43.1	66
Uta palmeri	Uta palmeri	Phrynosomatidae	38	266
Uta antiqua	Uta stansburiana	Phrynosomatidae	35.6143	66, 130, 233, 266, 267	7.8	268	43.55	117, 268
Phyllodactylus reissi	Phyllodactylus reissii	Phyllodactylidae	29.8	95
Phyllodactylus tuberculosus	Phyllodactylus tuberculosus	Phyllodactylidae	22.7	66
Phyllopezus pollicaris	Phyllopezus pollicaris	Phyllodactylidae	30.4	139
Phyllorhynchus decurtatus	Phyllorhynchus decurtatus	Phyllodactylidae	31	66			38	66
Ptyodactylus hasselquistii	Ptyodactylus hasselquistii	Phyllodactylidae	29.7545	122, 269
Tarentola boettgeri	Tarentola boettgeri	Phyllodactylidae	33.1333	270	5.3	270	41.6	270
Tarentola mauritanica	Tarentola mauritanica	Phyllodactylidae	24.8	95
Thecadactylus rapicauda	Thecadactylus rapicauda	Phyllodactylidae	26.9	271
Polychrus acutirostris	Polychrus acutirostris	Polychrotidae	35	139
Delma impar	Delma impar	Pygopodidae	24.9	251
Acontias meleagris	Acontias meleagris	Scincidae	21.8	302			41	302
Anomalopus leuckartii	Anomalopus leuckartii	Scincidae					35	303
Bassiana duperreyi	Bassiana duperreyi	Scincidae			3	69	43.5	69
Bellatorias major	Bellatorias major	Scincidae	33.8	304
Mabuya agilis	Brasiliscincus agilis	Scincidae	32.5667	137, 325, 326
Mabuya heathi	Brasiliscincus heathi	Scincidae	34.6	327
Carlia fusca	Carlia fusca	Scincidae	30.8	66
Carlia longipes	Carlia longipes	Scincidae					40.3	303
Carlia munda	Carlia munda	Scincidae					42.4	303
Carlia pectoralis	Carlia pectoralis	Scincidae					41.3	303
Carlia rhomboidalis	Carlia rhomboidalis	Scincidae	28.9	66			41.2	303
Carlia schmeltzi	Carlia schmeltzii	Scincidae					42.3	303
Carlia vivax	Carlia vivax	Scincidae	30.5	305			41.3	303
Chalcides ocellatus	Chalcides ocellatus	Scincidae	31.8	306
Tropidophorus queenslandiae	Concinnia queenslandiae	Scincidae					35.9
Eulamprus tenuis	Concinnia tenuis	Scincidae					39.2	303
Mabuya nigropunctata	Copeoglossum nigropunctatum	Scincidae	33.5	146, 329
Corucia zebrata	Corucia zebrata	Scincidae	30	88
Ctenotus atlas	Ctenotus atlas	Scincidae	35	307, 308
Sphenomorphus lesueurii	Ctenotus australis	Scincidae	32.6	67
Ctenotus brooksi	Ctenotus brooksi	Scincidae	30.6	307
Ctenotus calurus	Ctenotus calurus	Scincidae	35.6	307
Ctenotus essingtoni	Ctenotus essingtonii	Scincidae					45	303
Ctenotus fallens	Ctenotus fallens	Scincidae	36.2	309
Ctenotus grandis	Ctenotus grandis	Scincidae	34.2	307
Ctenotus labillardieri	Ctenotus labillardieri	Scincidae	32.2	67
Ctenotus leae	Ctenotus leae	Scincidae	37.7	307
Ctenotus leonhardii	Ctenotus leonhardii	Scincidae	38	307
Ctenotus pantherinus	Ctenotus pantherinus	Scincidae	33.1	307			36.9	310
Ctenotus piankai	Ctenotus piankai	Scincidae	35.5	307
Ctenotus quattuordeimlineatus	Ctenotus quattuordecimlineatus	Scincidae	35.8	307
Ctenotus regius	Ctenotus regius	Scincidae	36.4	311	8.7	308	45.1	308
Ctenotus robustus	Ctenotus robustus	Scincidae	34.4	308
Ctenotus schomburgkii	Ctenotus schomburgkii	Scincidae	33.3	307
Ctenotus spaldingi	Ctenotus spaldingi	Scincidae					45.5	303
Ctenotus taeniolalatus	Ctenotus taeniolatus	Scincidae	35.3	311	11	308	44.7	308
Ctenotus uber	Ctenotus uber	Scincidae	35.3	311	9.1	308	45.5	308
Cyclodomorphus branchialis	Cyclodomorphus branchialis	Scincidae					43.6	303
Egernia depressa	Egernia depressa	Scincidae	34	67
Egernia richardi	Egernia richardi	Scincidae	34.7	67
Egernia saxatilis	Egernia saxatilis	Scincidae			4.5	69	41.8	69
Egernia stokesii	Egernia stokesii	Scincidae	30.95	67, 312
Eremiascincus fasciolatus	Eremiascincus fasciolatus	Scincidae	28.1	311	9	308	41.2	308
Eremiascincus richardsoni	Eremiascincus richardsonii	Scincidae			7.3	308	42	308
Eulamprus heatwolei	Eulamprus heatwolei	Scincidae			5.3	69	39.5	69
Eulamprus kosciuskoi	Eulamprus kosciuskoi	Scincidae	30.6	311	2.5	69	40.2	69
Eulamprus quoyi	Eulamprus quoyii	Scincidae	28.8	311, 313, 314	6	315	39.8	315
Eulamprus tympanum	Eulamprus tympanum	Scincidae	30.7333	311, 316, 317	2.5	315	39	69
Eutropis multifasciata	Eutropis multifasciata	Scincidae	33.7	66
Eutropis rudis	Eutropis rudis	Scincidae	32.8	323
Glaphyromorphus punctulatus	Glaphyromorphus punctulatus	Scincidae					38.6	303
Hemiergis decresiensis	Hemiergis decresiensis	Scincidae	20.3	311	6.8	69	39.3	69
Hemiergis peronii	Hemiergis peronii	Scincidae	23.6	311	9.6	308	38.6	303
Hemiergis quadrilineatum	Hemiergis quadrilineata	Scincidae	27	67			38.1	303
Sphenomorphus arborens	Insulasaurus arborens	Scincidae	23.3	334
Lampropholis delicata	Lampropholis delicata	Scincidae			4.7	69	40.8	69
Lampropholis guichenoti	Lampropholis guichenoti	Scincidae			2.5	69	41.3	69
Lerista bougainvilli	Lerista bougainvillii	Scincidae	29.5	324			43.8	303
Lerista connivens	Lerista connivens	Scincidae	31.9	309
Lerista frosti	Lerista frosti	Scincidae					42.9	303
Lerista lineopunctulata	Lerista lineopunctulata	Scincidae	32.4	309
Lerista macropisthopus	Lerista macropisthopus	Scincidae	31.3	309
Lerista neander	Lerista neander	Scincidae					43.1	303
Lerista orientalis	Lerista orientalis	Scincidae					40.9	303
Lerista terdigitata	Lerista terdigitata	Scincidae					45.1	303
Egernia inornata	Liopholis inornata	Scincidae			9.8	69	41.6	69
Egernia striolata	Liopholis striata	Scincidae	32.7	308	6.1	308	44.2	308
Liopholis whitii	Liopholis whitii	Scincidae	34	304, 311	4	69	41.2	69
Lipinia pulchella	Lipinia pulchella	Scincidae					35.1
Lygisaurus foliorum	Lygisaurus foliorum	Scincidae	31.1	305
Mochlus sundevallii	Mochlus sundevalli	Scincidae	32.7	63
Morethia butleri	Morethia butleri	Scincidae					44.6	303
Niveoscincus metallicus	Niveoscincus metallicus	Scincidae	35.4	331	2.7	69	39.6	69
Niveoscincus ocellatus	Niveoscincus ocellatus	Scincidae			3	69	40.1	69
Mabuya frenata	Notomabuya frenata	Scincidae	31.8	327
Oligosoma maccanni	Oligosoma maccanni	Scincidae			3.3	332, 333
Parvoscincus decipiens	Parvoscincus decipiens	Scincidae					32.9	15
Pinoyscincus abdictus	Pinoyscincus abdictus	Scincidae					36.9	15
Pinoyscincus jagori	Pinoyscincus jagori	Scincidae	23.1	334			37	15
Eumeces anthracinus	Plestiodon anthracinus	Scincidae	25	66
Plestiodon chinensis	Plestiodon chinensis	Scincidae	31.2	335	6.3	336	42.3	336
Plestiodon egregius	Plestiodon egregius	Scincidae	29.5	337
Eumeces elegans	Plestiodon elegans	Scincidae	30.8	318	9.3	318	41.9	318
Eumeces fasciatus	Plestiodon fasciatus	Scincidae	33	66	2.5	66
Eumeces gilberti	Plestiodon gilberti	Scincidae	29.1	66, 319	7.7	319	42.3	319
Plestiodon inexpectatus	Plestiodon inexpectatus	Scincidae	33.2	66
Eumeces laticeps	Plestiodon laticeps	Scincidae	31.9667	66, 320, 321
Plestiodon latiscutatus	Plestiodon latiscutatus	Scincidae	29.8	338
Eumeces obsoletus	Plestiodon obsoletus	Scincidae	34	66			42	322
Plestiodon reynoldsi	Plestiodon reynoldsi	Scincidae	30.7	319, 339
Eumeces septentrionalis	Plestiodon septentrionalis	Scincidae	28.5	66
Eumeces skiltonianus	Plestiodon skiltonianus	Scincidae	27.6	66, 130			41.3	66
Eumeces brevilineatus	Plestiodon tetragrammus	Scincidae	28	66
Pseudemoia entrecasteauxii	Pseudemoia entrecasteauxii	Scincidae	33.2	311	2.5	69	42.1	69
Mabuya macrorhyncha	Psychosaura macrorhyncha	Scincidae	32.625	137, 325, 326, 328
Saiphos equalis	Saiphos equalis	Scincidae					37.3	303
Saproscincus basiliscus	Saproscincus basiliscus	Scincidae					35.5	303
Saproscincus mustelina	Saproscincus mustelinus	Scincidae			6.2	69	37.7	69
Saproscincus tetradactyla	Saproscincus tetradactylus	Scincidae					35.3	303
Scelotes gronovii	Scelotes gronovii	Scincidae	23	302			44.6	302
Lygosoma laterale	Scincella gemmingeri	Scincidae	28.8	66
Scincella laterale	Scincella lateralis	Scincidae	28.5	66
Scincus mitranus	Scincus mitranus	Scincidae	36.7	340
Eulamprus murrayi	Silvascincus murrayi	Scincidae					36.4	303
Sphenomorphus indicus	Sphenomorphus indicus	Scincidae	28.8	335	3.1	341	37.6	341
Sphenomorphus sabanus	Sphenomorphus sabanus	Scincidae	25.8	323
Tiliqua nigrolutea	Tiliqua nigrolutea	Scincidae			5.2	69	42.5	69
Tiliqua occipitalis	Tiliqua occipitalis	Scincidae	32.7	67
Tiliqua rugosa	Tiliqua rugosa	Scincidae	32.9	67, 308, 342, 343	3.5	308	43	308
Tiliqua scincoides	Tiliqua scincoides	Scincidae	32.9	344			43.9	345
Trachylepis brevicollis	Trachylepis brevicollis	Scincidae	33.4	63
Trachylepis capensis	Trachylepis capensis	Scincidae					48	302
Trachylepis occidentalis	Trachylepis occidentalis	Scincidae	36	65
Trachylepis perrotetii	Trachylepis perrotetii	Scincidae	33.8	64
Trachylepis quinquetaeniata	Trachylepis quinquetaeniata	Scincidae	35.6	63
Trachylepis spilogaster	Trachylepis spilogaster	Scincidae	34.5	65
Mabuya striata	Trachylepis striata	Scincidae	34.55	65, 66, 330	15.7	330	44.5	132
Trachylepis varia	Trachylepis varia	Scincidae	28	346
Trachylepis variegata	Trachylepis variegata	Scincidae	33.6	65
Typhlacontias brevipes	Typhlacontias brevipes	Scincidae	30.8	302			48	302
Coleodactylus amazonicus	Chatogekko amazonicus	Sphaerodactylidae	27.4	347
Coleodactylus septentrionalis	Coleodactylus septentrionalis	Sphaerodactylidae	27.4	347
Gonatodes antillensis	Gonatodes antillensis	Sphaerodactylidae	34.5	277
Gonatodes concinnatus	Gonatodes concinnatus	Sphaerodactylidae	29	147
Gonatodes hasemani	Gonatodes hasemani	Sphaerodactylidae	30.6	299
Gonatodes humeralis	Gonatodes humeralis	Sphaerodactylidae	29.35	299, 348
Pristurus carteri	Pristurus carteri	Sphaerodactylidae	38.9	349
Sphaerodactylus gaigeae	Sphaerodactylus gaigeae	Sphaerodactylidae			12.5	141	38.2	141
Sphaerodactylus klauberi	Sphaerodactylus klauberi	Sphaerodactylidae			10.4	141	36.3	141
Sphaerodactylus macrolepis	Sphaerodactylus macrolepis	Sphaerodactylidae			11.3	141	39.4	141
Sphaerodactylus nicholsi	Sphaerodactylus nicholsi	Sphaerodactylidae			11.4	141	39.5	141
Sphaerodactylus roosevelti	Sphaerodactylus roosevelti	Sphaerodactylidae			10.5	141	39.5	142
Sphaerodactylus townsendi	Sphaerodactylus townsendi	Sphaerodactylidae			11.4	141	42.1	141
Teratoscincus przewalskii	Teratoscincus przewalskii	Sphaerodactylidae	25	350	8.9	351
Sphenodon punctatus	Sphenodon punctatus	Sphenodontidae	14.5	122, 343
Ameiva ameiva	Ameiva ameiva	Teiidae	38.33	66, 139, 146, 147, 354			46.2	66
Ameiva bifrontata	Ameiva bifrontata	Teiidae	39.4	355
Ameiva chrysolaema	Ameiva chrysolaema	Teiidae	37.05	356, 357
Ameiva exsul	Ameiva exsul	Teiidae	39.5	358
Ameiva fuscata	Ameiva fuscata	Teiidae	36.1	294
Ameiva pluvianotata	Ameiva pluvianotata	Teiidae	37.8	112
Ameiva taeniura	Ameiva taeniura	Teiidae	37.2	357
Cnemidophorus ocellifer	Ameivula ocellifera	Teiidae	38.6	366, 367
Cnemidophorus ceralbensis	Aspidoscelis ceralbensis	Teiidae	40.1	66
Aspidoscelis gularis	Aspidoscelis gularis	Teiidae	39.4	66, 360
Aspidoscelis hyperythra	Aspidoscelis hyperythra	Teiidae	39.2	66, 233, 361
Cnemidophorus inornatus	Aspidoscelis inornata	Teiidae	40.2	360
Aspidoscelis sexlineata	Aspidoscelis sexlineata	Teiidae	39.325	66, 240, 360-363			51	362
Aspidoscelis tigris	Aspidoscelis tigris	Teiidae	39.4875	130, 240, 360, 364	10.5	121	45.1	121
Callopistes maculatus	Callopistes maculatus	Teiidae	36.9	143
Cnemidophorus gramivagus	Cnemidophorus gramivagus	Teiidae	37.7	365
Cnemidophorus lemniscatus	Cnemidophorus lemniscatus	Teiidae	38.6	66, 104, 365
Crocodilurus amazonicus	Crocodilurus amazonicus	Teiidae	31.2	146
Dracaena guianensis	Dracaena guianensis	Teiidae	30.2	146, 147
Ameiva festiva	Holcosus festivus	Teiidae	35.9	112, 359	15.5	121	43.7	121
Ameiva quadrilineata	Holcosus quadrilineatus	Teiidae	37.6	112			45.1	66
Kentropyx altamazonica	Kentropyx altamazonica	Teiidae	35.9	368
Kentropyx calcarata	Kentropyx calcarata	Teiidae	35.875	147, 298, 329, 369
Kentropyx pelviceps	Kentropyx pelviceps	Teiidae	33.9	366
Kentropyx striata	Kentropyx striata	Teiidae	36.95	146, 370
Tupinambis merrianae	Salvator merianae	Teiidae	35	366
Tupinambis quadilineatus	Tupinambis quadrilineatus	Teiidae	37.2	146
Trogonophis wiegmanni	Trogonophis wiegmanni	Trogonophidae	22	371, 372
Eurolophosaurus divaricatus	Eurolophosaurus divaricatus	Tropiduridae	38	373
Eurolophosaurus nanuzae	Eurolophosaurus nanuzae	Tropiduridae	34.1	374
Microlophus albemarlensis	Microlophus albemarlensis	Tropiduridae	34.2287	376, 377
Microlophus atacamensis	Microlophus atacamensis	Tropiduridae	32.4333	378
Microlophus peruvianus	Microlophus peruvianus	Tropiduridae	34.65	379, 380
Microlophus quadrivittatus	Microlophus quadrivittatus	Tropiduridae	36	380
Plica plica	Plica plica	Tropiduridae	30.7	381
Plica umbra	Plica umbra	Tropiduridae	28.65	298, 373
Tropidurus hispidus	Tropidurus hispidus	Tropiduridae	34.2714	146, 373, 382-384
Tropidurus hygomi	Tropidurus hygomi	Tropiduridae	35.4	373
Tropidurus insularis	Tropidurus insulanus	Tropiduridae	34.5	373
Tropidurus itambere	Tropidurus itambere	Tropiduridae	33.025	373, 384, 385
Tropidurus montanus	Tropidurus montanus	Tropiduridae	31.7	383
Tropidurus oreadicus	Tropidurus oreadicus	Tropiduridae	34.4667	146, 373, 384, 386
Tropidurus psammonastes	Tropidurus psammonastes	Tropiduridae	37.6	373
Tropidurus spinulosus	Tropidurus spinulosus	Tropiduridae	31.4	387
Tropidurus torquatus	Tropidurus torquatus	Tropiduridae	34.4375	325, 373, 374, 384
Uracentron flaviceps	Uracentron flaviceps	Tropiduridae	31.2	281
Uranoscodon superciliosus	Uranoscodon superciliosus	Tropiduridae	27.9	298, 388
Varanus bengalensis	Varanus bengalensis	Varanidae	33.1	389
Varanus brevicauda	Varanus brevicauda	Varanidae	35.4	251
Varanus caudolineatus	Varanus caudolineatus	Varanidae	37.3	307
Varanus eremius	Varanus eremius	Varanidae	37.5	81, 390
Varanus exanthematicus	Varanus exanthematicus	Varanidae	34.6	63, 391, 392
Varanus giganteus	Varanus giganteus	Varanidae	37.1	390, 393
Varanus gilleni	Varanus gilleni	Varanidae	37.4	390
Varanus gouldii	Varanus gouldii	Varanidae	37	67, 390, 394, 395			43.5	74
Varanus griseus	Varanus griseus	Varanidae	36.45	394, 396
Varanus indicus	Varanus indicus	Varanidae	30.3	397
Varanus komodoensis	Varanus komodoensis	Varanidae	38	398
Varanus mertensi	Varanus mertensi	Varanidae	34	395
Varanus niloticus	Varanus niloticus	Varanidae	30.35	63, 399
Varanus panoptes	Varanus panoptes	Varanidae	36.4	395
Varanus rosenbergi	Varanus rosenbergi	Varanidae	35	400
Varanus salvator	Varanus salvator	Varanidae	30.4	389, 401
Varanus scalaris	Varanus scalaris	Varanidae	38.9	73
Varanus tristus	Varanus tristis	Varanidae	34.8	390
Varanus varius	Varanus varius	Varanidae	35.5	402	5	69	43.7	69
Agkistrodon contortrix	Agkistrodon contortrix	Viperidae	27	66	6.9	403	40.6	403
Agkistrodon piscivorus	Agkistrodon piscivorus	Viperidae	26.2	66
Crotalus atrox	Crotalus atrox	Viperidae	27.4	66			39	66
Crotalus cerastes	Crotalus cerastes	Viperidae	26.2	66			41.6	66
Crotalus horridus	Crotalus horridus	Viperidae	25.9	66
Crotalus mitchelli	Crotalus mitchellii	Viperidae	30.3	66
Crotalus pricei	Crotalus pricei	Viperidae	21.1	66
Crotalus scutulatus	Crotalus scutulatus	Viperidae	30.3	66			42	66
Crotalus viridis	Crotalus viridis	Viperidae	28.9	66			38	66
Protobothrops mucrosquamatus	Protobothrops mucrosquamatus	Viperidae			3.5	404	38.6	404
Trimeresurus gracilis	Trimeresurus gracilis	Viperidae			3.7	404	38.3	404
Xantusia arizonae	Xantusia arizonae	Xantusidae	25.3	66
Xantusia henshawi	Xantusia henshawi	Xantusidae	20.5	66, 406			34.9	406
Klauberina riversiana	Xantusia riversiana	Xantusidae	23.7333	66, 405	6.6	405	39	405
Xantusia vigilis	Xantusia vigilis	Xantusidae	29.1	66, 407, 408	6.9	121	41.6	121
Lepidophyma flavimaculatum	Lepidophyma flavimaculatum	Xantusiidae			11.3	121	38	121
Xenosaurus grandis	Xenosaurus grandis	Xenosauridae	24.15	409, 410
Xenosaurus platyceps	Xenosaurus platyceps	Xenosauridae	24.6	411

## Sheet: Birds
Species	Species name in tree	Family	Ta	Ta-References	UTmin	UTmin-References	UTmax	UTmax-References
Aphelocoma california	Aphelocoma californica	Acanthizidae	42.3	412
Crateroscelis robusta	Crateroscelis robusta	Acanthizidae			11	413	28	413
Sericornis papuensis	Sericornis papuensis	Acanthizidae			15	413
Accipiter striatus	Accipiter striatus	Accipitridae	42.8	412
Buteo jamaicensis	Buteo jamaicensis	Accipitridae	40.6	412
Buteo lagopus	Buteo lagopus	Accipitridae	40.1	412
Buteo swainsoni	Buteo swainsoni	Accipitridae	40.7	412
Circus (cyaneus) hudsonius	Circus cyaneus	Accipitridae	40.8	412
Geranoaetus melanoleucus	Geranoaetus melanoleucus	Accipitridae	40.3	412
Gypaetus barbatus	Gypaetus barbatus	Accipitridae	40.2	412
Haliaeetus leucophalus	Haliaeetus leucocephalus	Accipitridae	41	412
Milvus migrans	Milvus migrans	Accipitridae	37.2	412
Petrochelidon [lunifrons]	Petrochelidon pyrrhonota	Accipitridae	41.3	412
Spizella [monticola]	Spizella arborea	Accipitridae	42.4	412
Acrocephalus schoenobaenus	Acrocephalus schoenobaenus	Acrocephalidae	39.3	412
Acrocephalus scirpaceus	Acrocephalus scirpaceus	Acrocephalidae	39.6	412
Psaltriparus minimus	Psaltriparus minimus	Aegithalidae	42.1	412
Aegotheles cristatus	Aegotheles cristatus	Aegothelidae			31	414
Alaemon alaudipes	Alaemon alaudipes	Alaudidae			32.7	415	37.5	415
Alauda arvensis	Alauda arvensis	Alaudidae	40.6	412	22.2	415	35.1	415
Eremalauda dunni	Eremalauda dunni	Alaudidae			31.5	415	43.6	415
Eremophila alpestris	Eremophila alpestris	Alaudidae	43	412
Lullula arborea	Lullula arborea	Alaudidae			27.6	415	37.5	415
Alcedo atthis	Alcedo atthis	Alcedinidae	37.6	412
Alcedo azurea	Alcedo azurea	Alcedinidae			19	413	34	413
Dacelo gaudichaud	Dacelo gaudichaud	Alcedinidae			25	413
Dacelo novaeguineae	Dacelo novaeguineae	Alcedinidae			20	416
Tanysiptera galatea	Tanysiptera galatea	Alcedinidae			15	413
Todiramphus sanctus	Todiramphus sanctus	Alcedinidae			25	413
Aethia cristetella	Aethia cristatella	Alcidae	41.6	412
Aethia pusilla	Aethia pusilla	Alcidae	41	412
Alca torda	Alca torda	Alcidae	41.3	412
Alle alle	Alle alle	Alcidae			4.5	417	20	417
Fratercula arctica	Fratercula arctica	Alcidae	40.1	412
Fratercula cirrhata	Fratercula cirrhata	Alcidae	39.4	412
Synthliboramphus hypoleucus	Synthliboramphus hypoleucus	Alcidae	39.1	412
Uria aalge	Uria aalge	Alcidae	41.6	412	15	418
Uria lomvia	Uria lomvia	Alcidae	39	412	2	419
Anas acuta	Anas acuta	Anatidae	41.5	412
Anas americana	Anas americana	Anatidae	41	412
Anas aucklandica	Anas aucklandica	Anatidae			30	420	37	420
Anas castanea	Anas castanea	Anatidae			24	420	37	420
Anas clypeata	Anas clypeata	Anatidae	41.4	412
Anas cyanoptera	Anas cyanoptera	Anatidae	41.7	412
Anas discors	Anas discors	Anatidae	42.6	412
Anas gracilis	Anas gracilis	Anatidae			30	420
Anas laysanensis	Anas laysanensis	Anatidae	40.6	412
Anas penelope	Anas penelope	Anatidae	41.5	412
Anas platyrhynchos	Anas platyrhynchos	Anatidae	41.3	412
Anas rhynchotis	Anas rhynchotis	Anatidae			22	420
Anas strepera	Anas strepera	Anatidae	41.9	412
Anser caerulescens	Chen caerulescens	Anatidae	42.1	412
Aythya affinis	Aythya affinis	Anatidae	41.3	412
Aythya americana	Aythya americana	Anatidae	43.3	412
Branta bernicla	Branta bernicla	Anatidae	40.5	412	6	421
Branta canadensis	Branta canadensis	Anatidae	41.2	412
Bucephala clangula	Bucephala clangula	Anatidae	41.5	412
Chlorestes notatus	Chlorestes notata	Anatidae	38.8	412
Cygnus buccinator	Cygnus buccinator	Anatidae	40.1	412
Dendroica caerulescens	Dendroica caerulescens	Anatidae	42.4	412
Dendroica castenea	Dendroica castanea	Anatidae	42.5	412
Dendroica cerulea	Dendroica cerulea	Anatidae	42.8	412
Dendroica coronata	Dendroica coronata	Anatidae	42.5	412
Dendroica discolor	Dendroica discolor	Anatidae	42.2	412
Dendroica dominica	Dendroica dominica	Anatidae	42.4	412
Dendroica fusca	Dendroica fusca	Anatidae	42.2	412
Dendroica graciae	Dendroica graciae	Anatidae	42.2	412
Dendroica magnolia	Dendroica magnolia	Anatidae	42.2	412
Dendroica nigrescens	Dendroica nigrescens	Anatidae	42.3	412
Dendroica palmarum	Dendroica palmarum	Anatidae	42.6	412
Dendroica petechia	Dendroica petechia	Anatidae	42.6	412
Dendroica striata	Dendroica striata	Anatidae	42	412
Dendroica tigrina	Dendroica tigrina	Anatidae	42.7	412
Dendroica virens	Dendroica virens	Anatidae	42.2	412
Hymenolaimus malacorhynchos	Hymenolaimus malacorhynchos	Anatidae			12	420
Lophodytes cucullatus	Lophodytes cucullatus	Anatidae	42.2	412
Mergus serrator	Mergus serrator	Anatidae	41.9	412
Oxyura jamaicensis	Oxyura jamaicensis	Anatidae	42.2	412
Tadorna variegata	Tadorna variegata	Anatidae					33	420
Anhinga anhinga	Anhinga anhinga	Anhingidae	40.9	412
Aeronautes saxatalis	Aeronautes saxatalis	Apodidae	38.6	412
Chaetura pelagica	Chaetura pelagica	Apodidae	41.8	412
Collocalia esculenta	Collocalia esculenta	Apodidae	38.2	412	31.5	422	34	422
Collocalia vanikorensis	Collocalia vanikorensis	Apodidae	38.9	412	30	422	34	422
Apteryx australis	Apteryx australis	Apterygidae	37.75	423	10	424
Apteryx haastii	Apteryx haastii	Apterygidae			5	424
Apteryx owenii	Apteryx owenii	Apterygidae			6	424
Aramus guarauna	Aramus guarauna	Aramidae	40.5	412
Ardea herodias	Ardea herodias	Ardeidae	40.1	412
Butorides virescens	Butorides virescens	Ardeidae	41	412
Nycticorax nycticorax	Nycticorax nycticorax	Ardeidae	39.5	412
Bombycilla cedrorum	Bombycilla cedrorum	Bombycillidae	42.8	412
Aceros plicatus	Aceros plicatus	Bucerotidae			16	425	35	425
Bycanistes bucinator	Bycanistes bucinator	Bucerotidae			24	426	30	426
Cacatua roseicapilla	Cacatua roseicapilla	Cacatuidae			22	427	33	427
Calcarius lapponicus	Calcarius lapponicus	Calcariidae	41.7	412
Plectrophenax nivalis	Plectrophenax nivalis	Calcariidae	40	412	9	428
Egretta [candidissima]	Egretta thula	Campephagidae	40.1	412
Caprimulgus europaeus	Caprimulgus europaeus	Caprimulgidae	37.6	412
Caprimulgus macrurus	Caprimulgus macrurus	Caprimulgidae	38.1	412	26	422
Caprimulgus vociferus	Caprimulgus vociferus	Caprimulgidae	42.4	412	25	429	37	429
Chordeiles acutipennis	Chordeiles acutipennis	Caprimulgidae	42	412
Chordeiles minor	Chordeiles minor	Caprimulgidae	41.1	412	30	430	39	430
Eurostopodus mystacalis	Eurostopodus mystacalis	Caprimulgidae	40.1	412	30	422
Nyctidromus albicollis	Nyctidromus albicollis	Caprimulgidae			23.5	428
Phalaenoptilus nuttallii	Phalaenoptilus nuttallii	Caprimulgidae	39	412	35	431
Cardinalis cardinalis	Cardinalis cardinalis	Cardinalidae	42.9	412	29	432	42.6	432
Cardinalis sinuatus	Cardinalis sinuatus	Cardinalidae			30	432	42.8	432
Passerina amoena	Passerina amoena	Cardinalidae	42.5	412
Passerina cyanea	Passerina cyanea	Cardinalidae	42.6	412
Pheucticus ludovicianus	Pheucticus ludovicianus	Cardinalidae	42.7	412
Pheucticus melanocephalus	Pheucticus melanocephalus	Cardinalidae	42.5	412
Piranga erythromelas	Piranga olivacea	Cardinalidae	42	412
Piranga hepatica	Piranga flava	Cardinalidae	43	412
Piranga ludoviciana	Piranga ludoviciana	Cardinalidae	42.1	412
Piranga rubra	Piranga rubra	Cardinalidae	43.1	412
Spiza americana	Spiza americana	Cardinalidae	42.4	412
Dromaius novaehollandiae	Dromaius novaehollandiae	Casuariidae	38	412
Cathartes aura	Cathartes aura	Cathartidae	39.9	412
Certhia familiaris	Certhia familiaris	Certhiidae	42	412
Charadrius alexandrinus	Charadrius alexandrinus	Charadriidae	41.6	412
Charadrius hiaticula	Charadrius hiaticula	Charadriidae	39.9	412
Charadrius montanus	Charadrius montanus	Charadriidae	41.5	412
Charadrius semipalmatus	Charadrius semipalmatus	Charadriidae	42.8	412
Charadrius vociferus	Charadrius vociferus	Charadriidae	41.7	412
Charadrius wilsonia	Charadrius wilsonia	Charadriidae	42.2	412
Pluvialis dominica	Pluvialis dominica	Charadriidae	38.3	412
Pluvialis squatarola	Pluvialis squatarola	Charadriidae	41.3	412
Vanellus vanellus	Vanellus vanellus	Charadriidae	38.2	412
Jabiru mycteria	Jabiru mycteria	Ciconiidae	40.1	412
Leptoptilos javanicus	Leptoptilos javanicus	Ciconiidae	39.6	433
Cinclus mexicanus	Cinclus mexicanus	Cinclidae	41.8	412	11.5	434	34	434
Cnemophilus loriae	Cnemophilus loriae	Cnemophilidae			20	435
Cnemophilus macgregorii	Cnemophilus macgregorii	Cnemophilidae			15	413
Colius colius	Colius colius	Coliidae			29	436
Colius striatus	Colius striatus	Coliidae			25	437
Urocolius macrourus	Urocolius macrourus	Coliidae			29	438
Caloenas nicobarica	Caloenas nicobarica	Columbidae			25	439
Columba fasciata	Patagioenas fasciata	Columbidae	42.2	412
Columba livia	Columba livia	Columbidae	41	412	23	440	36.5	440
Columba vitiensis	Columba vitiensis	Columbidae			22	439
Columbina inca	Columbina inca	Columbidae	42.9	412	32	441
Columbina passerina	Columbina passerina	Columbidae	41.8	412
Drepanoptila holosericea	Drepanoptila holosericea	Columbidae			27	442
Ducula bicolor	Ducula bicolor	Columbidae			26	439
Ducula pacifica	Ducula pacifica	Columbidae			27.5	439
Ducula pinon	Ducula pinon	Columbidae			23	439
Ducula pistrinaria	Ducula pistrinaria	Columbidae			27	439
Ducula rubricera	Ducula rubricera	Columbidae			24	439
Ducula rufigaster	Ducula rufigaster	Columbidae			26	439
Ducula zoeae	Ducula zoeae	Columbidae			19	439	32	439
Gallicolumba beccarii	Gallicolumba beccarii	Columbidae			24	413
Geopelia cuneata	Geopelia cuneata	Columbidae			34	443
Geophaps plumifera	Geophaps plumifera	Columbidae			33	444	39	444
Goura cristata	Goura cristata	Columbidae			19	439
Gymnophaps albertisii	Gymnophaps albertisii	Columbidae			22	439
Hemiphaga novaeseelandiae	Hemiphaga novaeseelandiae	Columbidae			20	439	30	439
Leucosarcia melanoleuca	Leucosarcia melanoleuca	Columbidae			24	439
Ptilinopus melanospilus	Ptilinopus melanospilus	Columbidae			30	439
Ptilinopus superbus	Ptilinopus superbus	Columbidae			26	439
Zenaida asiatica	Zenaida asiatica	Columbidae	42.7	412
Aphelocoma coerulescens	Aphelocoma coerulescens	Corvidae			12.4	445
Corvus brachyrhynchos	Corvus brachyrhynchos	Corvidae	42.2	412
Corvus caurinus	Corvus caurinus	Corvidae			-7	421
Corvus corax	Corvus corax	Corvidae	42.3	412
Corvus cryptoleucus	Corvus cryptoleucus	Corvidae	41.8	412
Cyanocitta cristata	Cyanocitta cristata	Corvidae	42.7	412
Cyanocitta stelleri	Cyanocitta stelleri	Corvidae	42	412	28	445
Gavia (arctica) pacifica	Gavia pacifica	Corvidae	39	412
Gymnorhinus cyanocephalus	Gymnorhinus cyanocephalus	Corvidae	42.4	412
Nucifraga caryocatactes	Nucifraga caryocatactes	Corvidae	42	412
Nucifraga columbiana	Nucifraga columbiana	Corvidae	41.6	412
Perisoreus canadensis	Perisoreus canadensis	Corvidae	42.1	412
Pica hudsonia	Pica hudsonia	Corvidae			21	446	32.5	446
Pica nuttalli	Pica nuttalli	Corvidae	42.2	412	13.5	446	33.5	446
Pica pica	Pica pica	Corvidae	41.8	412	21	446	32.5	446
Poeciel (Parus) sclateri	Parus sclateri	Corvidae	42	412
Poecile (Parus) caeruleus	Parus caeruleus	Corvidae	39.5	412
Poecile (Parus) palustris	Parus palustris	Corvidae	41.6	412
Domestic chicken	Gallus gallus	Cotingidae	41.5	423
Domestic duck	Cairina moschata	Cotingidae	42.1	423
Domestic goose	Anser anser	Cotingidae	41	423
Domestic turkey	Meleagris gallopavo	Cotingidae	42.5	412
Crax rubra	Crax rubra	Cracidae	40.3	412
Penelope purpuratus	Penelope purpurascens	Cracidae	40.8	412
Pipilo aberti	Pipilo aberti	Cracidae	43.3	412
Coccyzus americanus	Coccyzus americanus	Cuculidae	41.2	412
Coccyzus erythropthalmus	Coccyzus erythropthalmus	Cuculidae	42.8	412
Geococcyx californianus	Geococcyx californianus	Cuculidae			27	440	36	440
Guira guira	Guira guira	Cuculidae			27	447
Diomedea exulans	Diomedea exulans	Diomedeidae	39.6	412
Diomedea immutabilis	Phoebastria immutabilis	Diomedeidae	39.1	412
Diomedea nigripes	Phoebastria nigripes	Diomedeidae	38.7	412
Emberiza citrinella	Emberiza citrinella	Emberizidae	40.5	412
Amadina fasciata	Amadina fasciata	Estrildidae			31	448	38	448
Erythrura gouldiae	Erythrura gouldiae	Estrildidae			31.7	449	38	449
Estrilda melpoda	Estrilda melpoda	Estrildidae			35	448
Estrilda troglodytes	Estrilda troglodytes	Estrildidae	39.75	412	36	450	38	450
Lonchura cucullata	Lonchura cucullata	Estrildidae			33	451
Taeniopygia guttata	Taeniopygia guttata	Estrildidae	41.4	412	30	448
Daptrius ater	Daptrius ater	Falconidae			19.5	452
Falco peregrinus	Falco peregrinus	Falconidae	40.7	412
Falco rupicoloides	Falco rupicoloides	Falconidae			15	453
Falco sparvarius	Falco sparverius	Falconidae	40.5	423	15	453	30	453
Carduelis pinus	Carduelis pinus	Fringillidae	42.1	412
Carduelis tristis	Carduelis tristis	Fringillidae	42.3	412
Carpodacus cassinii	Carpodacus cassinii	Fringillidae			22	454	37.5	454
Carpodacus mexicanus	Carpodacus mexicanus	Fringillidae	42.5	412	25	455
Carpodacus purpureus	Carpodacus purpureus	Fringillidae	42.4	412
Fringilla coelebs	Fringilla coelebs	Fringillidae	40.8	412
Hesperiphona vespertina	Coccothraustes vespertinus	Fringillidae	40.2	412
Loxia curvirostra	Loxia curvirostra	Fringillidae	42.3	412
Loxia leucoptera	Loxia leucoptera	Fringillidae	43	412
Pinicola enucleator	Pinicola enucleator	Fringillidae	41.6	412
Thryomanes bewicki	Thryomanes bewickii	Furnariidae	42.1	412
Grus canadensis	Grus canadensis	Gruidae	40.8	412
Grus paradisea	Grus paradisea	Gruidae	40.6	412
Hirundo rustica	Hirundo rustica	Hirundinidae	41.4	412
Progne subis	Progne subis	Hirundinidae	41.8	412
Riparia riparia	Riparia riparia	Hirundinidae	41.4	412
Stelgidopteryx serripennis	Stelgidopteryx serripennis	Hirundinidae	42.7	412
Tachycineta thalassina	Tachycineta thalassina	Hirundinidae	40.9	412
Agelaius phoeniceus	Agelaius phoeniceus	Icteridae	42.4	412	27.5	457	40	457
Agelaius tricolor	Agelaius tricolor	Icteridae	42.6	412
Chrysonia oenone	Chrysuronia oenone	Icteridae	35	412
Dolichonyx oryzivorus	Dolichonyx oryzivorus	Icteridae	41.7	412
Euphagus carolinus	Euphagus carolinus	Icteridae	43.4	412
Euphagus cyanocephalus	Euphagus cyanocephalus	Icteridae	42.2	412
Icteria virens	Icteria virens	Icteridae	42.6	412
Icterus bullocki	Icterus bullockii	Icteridae	42.2	412
Icterus cucullatus	Icterus cucullatus	Icteridae	42.9	412
Icterus galbula	Icterus galbula	Icteridae	42.8	412
Icterus parisorum	Icterus parisorum	Icteridae	42.3	412
Icterus spurius	Icterus spurius	Icteridae	42.3	412
Molothrus ater	Molothrus ater	Icteridae	42.3	412
Quiscalus major	Quiscalus major	Icteridae	43	412
Quiscalus quiscula	Quiscalus quiscula	Icteridae	43.1	412
Sturnella neglecta	Sturnella neglecta	Icteridae	42.2	412
Xanthocephalus xanthocephalus	Xanthocephalus xanthocephalus	Icteridae	42.4	412
Lanius collaris	Lanius collaris	Laniidae			25	458
Lanius collurio	Lanius collurio	Laniidae	41.6	412
Lanius excubitor	Lanius excubitor	Laniidae	41.5	412
Lanius ludovicianus	Lanius ludovicianus	Laniidae	42.1	412
Anous stolidus	Anous stolidus	Laridae	40.3	412
Larus atricilla	Larus atricilla	Laridae	41.1	412
Larus californicus	Larus californicus	Laridae	41.4	412
Larus canus	Larus canus	Laridae	40.7	412
Larus delawarensis	Larus delawarensis	Laridae	41.3	412
Larus dominicanus	Larus dominicanus	Laridae	41	412
Larus glaucescens	Larus glaucescens	Laridae	41.7	412
Larus glaucoides	Larus glaucoides	Laridae	40.7	412
Larus glaucus	Larus hyperboreus	Laridae	42.1	412
Larus pacificus	Larus pacificus	Laridae	41.2	412
Larus philadelphia	Larus philadelphia	Laridae	41.4	412
Larus pipixcan	Larus pipixcan	Laridae	40.9	412
Rissa tridactyla	Rissa tridactyla	Laridae	41.5	412	4.5	419
Rynchops niger	Rynchops niger	Laridae	40.6	412
Sterna caspia	Sterna caspia	Laridae	41.2	412
Sterna forsteri	Sterna forsteri	Laridae	41.5	412
Sterna fuscata	Sterna fuscata	Laridae	41.7	412
Sterna maxima	Sterna maxima	Laridae	41.3	412
Sterna sandvichensis	Sterna sandvicensis	Laridae	41.6	412
Sterna vittata	Sterna vittata	Laridae	40.9	412
Amphispiza belli	Amphispiza belli	Locustellidae	43	412	28	459	37	459
Locustella naevia	Locustella naevia	Locustellidae	42.4	412
Trachyphonus darnaudii	Trachyphonus darnaudii	Lybiidae			35	425
Malurus cyaneus	Malurus cyaneus	Maluridae			26	460	35	460
Leipoa ocellata	Leipoa ocellata	Megapodiidae			22	461	37	461
Melanocharis versteri	Melanocharis versteri	Melanocharitidae					30	413
Toxorhamphus poliopterus	Toxorhamphus poliopterus	Melanocharitidae			19	413	30	413
Ceryle (Megaceryle) alcyon	Megaceryle alcyon	Meliphagidae	40	412
Lichenostomus virescens	Lichenostomus virescens	Meliphagidae			33	462
Lichmera indistincta	Lichmera indistincta	Meliphagidae			30	462
Melidectes belfordi	Melidectes belfordi	Meliphagidae			19	413
Oreortyx picta	Oreortyx pictus	Meliphagidae	42	412
Ptiloprora guisei	Ptiloprora guisei	Meliphagidae			15	413
Dumetella carolinensis	Dumetella carolinensis	Mimidae	42.6	412
Melanotrochilus fuscus	Florisuga fusca	Mimidae	42.2	412
Mimus polyglottos	Mimus polyglottos	Mimidae	42.9	412
Oreoscoptes montanus	Oreoscoptes montanus	Mimidae	42.9	412
Toxostoma crissale	Toxostoma crissale	Mimidae	42.8	412
Toxostoma curvirostre	Toxostoma curvirostre	Mimidae	42.7	412
Anthus cervinus	Anthus cervinus	Motacillidae	40.1	412
Anthus pratensis	Anthus pratensis	Motacillidae	40.5	412
Anthus rubescens	Anthus rubescens	Motacillidae	42.5	412
Anthus spinoletta	Anthus spinoletta	Motacillidae	40.3	412
Anthus spraguei	Anthus spragueii	Motacillidae	42.6	412
Anthus trivialis	Anthus trivialis	Motacillidae	40.7	412
Motacilla alba	Motacilla alba	Motacillidae	40.6	412
Motacilla flava	Motacilla flava	Motacillidae	40.5	412
Erithacus rubecula	Erithacus rubecula	Muscicapidae	40.6	412
Ficedula hypoleuca	Ficedula hypoleuca	Muscicapidae	40.4	412
Hydranassa tricolor	Egretta tricolor	Muscicapidae	40.8	412
Luscinia svecica	Luscinia svecica	Muscicapidae	41.5	412
Muscicapa parva	Ficedula parva	Muscicapidae	40.7	412
Muscicapa striata	Muscicapa striata	Muscicapidae	41	412
Oenanthe oenanthe	Oenanthe oenanthe	Muscicapidae	41.2	412
Phoenicurus phoenicurus	Phoenicurus phoenicurus	Muscicapidae	41	412
Saxicola rubetra	Saxicola rubetra	Muscicapidae	40.3	412
Aethopyga christinae	Aethopyga christinae	Nectariniidae			25	463	32	463
Anthreptes collaris	Anthreptes collaris	Nectariniidae			25	463
Anthreptes orientalis	Anthreptes orientalis	Nectariniidae			25	463
Nectarinia kilimensis	Nectarinia kilimensis	Nectariniidae			25	464
Nectarinia minulla	Nectarinia minulla	Nectariniidae			33	464
Nectarinia senegalensis	Nectarinia senegalensis	Nectariniidae			30	464
Nectarinia verticalis	Nectarinia verticalis	Nectariniidae			31.6	464
Numida meleagris	Numida meleagris	Numididae	43.3	412
Callipepla californica	Callipepla californica	Odontophoridae	40.6	412	27.5	465	37.5	465
Callipepla gambelii	Callipepla gambelii	Odontophoridae	40.6	412	27	466	40.5	456
Colinus virginianus	Colinus virginianus	Odontophoridae	41.8	412
Pitohui nigrescens	Pitohui nigrescens	Oriolidae			13	413	30	413
Chlamydotis undulata	Chlamydotis undulata	Otididae			29	467
Lobipes lobatus	Phalaropus lobatus	Otididae	41.7	412
Pachycephala schlegelii	Pachycephala schlegelii	Pachycephalidae			14	413
Astrapia stephaniae	Astrapia stephaniae	Paradisaeidae			23	435
Cicinnurus magnificus	Cicinnurus magnificus	Paradisaeidae			20	435
Cicinnurus regius	Cicinnurus regius	Paradisaeidae			20	435
Epimachus meyeri	Epimachus meyeri	Paradisaeidae			18	435
Lophorina superba	Lophorina superba	Paradisaeidae			19	435
Manucodia chalybatus	Manucodia chalybatus	Paradisaeidae			20	435
Manucodia keraudrenii	Manucodia keraudrenii	Paradisaeidae			25	435
Paradisaea raggiana	Paradisaea raggiana	Paradisaeidae			16	435
Paradisaea rudolphi	Paradisaea rudolphi	Paradisaeidae			17	435
Parotia lawesii	Parotia lawesii	Paradisaeidae			17	435
Parotia wahnesi	Parotia wahnesi	Paradisaeidae			22	435
Parus gambeli	Parus gambeli	Paradisaeidae	42.6	412	14.7	468	31.5	468
Parus (Baeolophus) bicolor	Baeolophus bicolor	Paradisaeidae	43	412
Parus (Baeolophus) inornatus	Baeolophus inornatus	Paradisaeidae	42.6	412
Parus (Baeolophus) wollweberi	Baeolophus wollweberi	Paradisaeidae	42.5	412
Parus atricapillus	Parus atricapillus	Paradisaeidae	42.4	412	25	469
Parus carolinensis	Parus carolinensis	Paradisaeidae	42.3	423
Parus cinctus	Parus cinctus	Paradisaeidae	41.5	423
Baeolophus ridgwayi	Baeolophus ridgwayi	Paridae			17.1	468	35.7	468
Cephus grylle	Cepphus grylle	Paridae	40.4	412	7	419
Geothlypis trichas	Geothlypis trichas	Parulidae	42.3	412
Helmitherus vermivorus	Helmitheros vermivorum	Parulidae	42.3	412
Mniotilta varia	Mniotilta varia	Parulidae	42.2	412
Oporornis formosus	Oporornis formosus	Parulidae	42.1	412
Oporornis philadelphia	Oporornis philadelphia	Parulidae	42.1	412
Oporornis tolmiei	Oporornis tolmiei	Parulidae	42	412
Seiurus aurocapillus	Seiurus aurocapilla	Parulidae	41.9	412
Seiurus motacilla	Seiurus motacilla	Parulidae	43	412
Seiurus noveboracensis	Seiurus noveboracensis	Parulidae	42.7	412
Setophaga ruticilla	Setophaga ruticilla	Parulidae	43.2	412
Vermivora celata	Vermivora celata	Parulidae	42	412
Vermivora chrysoptera	Vermivora chrysoptera	Parulidae	42.7	412
Vermivora luciae	Vermivora luciae	Parulidae	42.7	412
Vermivora peregrina	Vermivora peregrina	Parulidae	42.3	412
Vermivora pinus	Vermivora pinus	Parulidae	41.6	412
Vermivora virginiae	Vermivora virginiae	Parulidae	42.3	412
Aimophila ruficeps	Aimophila ruficeps	Passerellidae	43.2	412
Ammodramus henslowi	Ammodramus henslowii	Passerellidae	41.2	412
Ammodramus savannarum	Ammodramus savannarum	Passerellidae	42.6	412
Amphispiza bilineata	Amphispiza bilineata	Passerellidae	42.8	412			36	456
Calamospiza melanocorys	Calamospiza melanocorys	Passerellidae	42.4	412
Junco hyemalis	Junco hyemalis	Passerellidae	42.7	412
Junco phaeonotus	Junco phaeonotus	Passerellidae	42.6	412
Melospiza georgiana	Melospiza georgiana	Passerellidae	42.8	412
Melospiza lincolni	Melospiza lincolnii	Passerellidae	42.1	412
Melospiza melodia	Melospiza melodia	Passerellidae	42.8	412
Passerculus sandwichensis	Passerculus sandwichensis	Passerellidae	42.7	412
Passerella iliaca	Passerella iliaca	Passerellidae	42.9	412
Peucedramus (olivaceus) taeniatus	Peucedramus taeniatus	Passerellidae	41.9	412
Pipilo crissalis	Pipilo crissalis	Passerellidae	42.3	412
Pipilo erythrophtalmus	Pipilo erythrophthalmus	Passerellidae	43.3	412
Pipilo fuscus	Pipilo fuscus	Passerellidae	42.2	412
Pipilo maculatus	Pipilo maculatus	Passerellidae	42.8	412
Spizella breweri	Spizella breweri	Passerellidae	42.5	412
Spizella pallida	Spizella pallida	Passerellidae	42.2	412
Spizella passerina	Spizella passerina	Passerellidae	42.4	412
Spizella pusilla	Spizella pusilla	Passerellidae	42.1	412
Zonotrichia albicollis	Zonotrichia albicollis	Passerellidae	43.4	412
Zonotrichia coronata	Zonotrichia atricapilla	Passerellidae	42.8	412
Zonotrichia leucophrys	Zonotrichia leucophrys	Passerellidae	42.8	412
Zonotrichia querula	Zonotrichia querula	Passerellidae	42.5	412
Passer domesticus	Passer domesticus	Passeridae	42.1	412	20	470	35	470
Pelecanus erythrorhynchos	Pelecanus erythrorhynchos	Pelecanidae	39.8	412
Pelecanus occidentalis	Pelecanus occidentalis	Pelecanidae	41.2	412
Peneothello sigillata	Peneothello sigillatus	Petroicidae			10	413	30	413
Phalacrocorax auritus	Phalacrocorax auritus	Phalacrocoracidae	41.3	412
Phalacrocorax carbo	Phalacrocorax carbo	Phalacrocoracidae	39.8	412
Phalacrocorax pelagicus	Phalacrocorax pelagicus	Phalacrocoracidae	40.5	412
Alectoris chukar	Alectoris chukar	Phasianidae			24	471	39	471
Ammoperdix heyi	Ammoperdix heyi	Phasianidae			30	472
Coturnix pectoralis	Coturnix pectoralis	Phasianidae			27	473
Lagopus lagopus	Lagopus lagopus	Phasianidae	41.7	412	0.6	474
Lagopus leucura	Lagopus leucura	Phasianidae	41.5	412	6	475	38	475
Lagopus muta	Lagopus muta	Phasianidae	42.3	412	-8.7	474
Phasianus colchicus	Phasianus colchicus	Phasianidae	41.9	412
Syrmaticus ellioti	Syrmaticus ellioti	Phasianidae			24.5	476	31.6	476
Syrmaticus humiae	Syrmaticus humiae	Phasianidae			23	476	29.2	476
Phoenicopterus antiquorum	Phoenicopterus roseus	Phoenicopteridae	41.1	412
Phoeniculus purpureus	Phoeniculus purpureus	Phoeniculidae	41	412	23.1	477
Phylloscopus collybita	Phylloscopus collybita	Phylloscopidae	41.3	412
Phylloscopus sibilatrix	Phylloscopus sibilatrix	Phylloscopidae	41.2	412
Phylloscopus trochilus	Phylloscopus trochilus	Phylloscopidae	40.4	412
Picoides albolarvatus	Picoides albolarvatus	Picathartidae	41.8	412
Colaptes auratus	Colaptes auratus	Picidae	42.3	412
Dryocopus pileatus	Dryocopus pileatus	Picidae	41.7	412
Melanerpes carolinus	Melanerpes carolinus	Picidae	43	412
Melanerpes erythrocephalus	Melanerpes erythrocephalus	Picidae	42.4	412
Melanerpes formicivorus	Melanerpes formicivorus	Picidae	42.5	412
Melanerpes lewisi	Melanerpes lewis	Picidae	42.2	412
Melanerpes uropygialis	Melanerpes uropygialis	Picidae	42.2	412
Picoides arcticus	Picoides arcticus	Picidae	42.3	412
Picoides arizonae	Picoides arizonae	Picidae	42.3	412
Picoides borealis	Picoides borealis	Picidae	42.4	412
Picoides nuttalli	Picoides nuttallii	Picidae	42.3	412
Picoides pubescens	Picoides pubescens	Picidae	42.1	412
Picoides scalaris	Picoides scalaris	Picidae	42.5	412
Picoides tridactylus	Picoides tridactylus	Picidae	42.2	412
Picoides villosus	Picoides villosus	Picidae	42.5	412
Sphyrapicus ruber	Sphyrapicus ruber	Picidae	42.1	412
Sphyrapicus thyroideus	Sphyrapicus thyroideus	Picidae	41.5	412
Sphyrapicus varius	Sphyrapicus varius	Picidae	42.6	412
Manacus vitellinus	Manacus vitellinus	Pipridae			26	478
Pipra mentalis	Pipra mentalis	Pipridae			26	478
Pitta versicolor	Pitta versicolor	Pittidae			20	413
Podargus papuansis	Podargus papuensis	Podargidae	38.8	412
Podargus strigoides	Podargus strigoides	Podargidae	38.6	412	30	422
Aechmophorus occidentalis	Aechmophorus occidentalis	Podicipedidae	38.5	412
Podiceps caspicus	Podiceps auritus	Podicipedidae	40.5	412
Podiceps nigricollis	Podiceps nigricollis	Podicipedidae	40.5	412
Podilymbus podiceps	Podilymbus podiceps	Podicipedidae	39.3	412
Tachycineta (Iridiprocne) bicolor	Tachycineta bicolor	Podicipedidae	41.7	412
Polioptila caerulea	Polioptila caerulea	Polioptilidae	42.1	412
Polioptila plumbea	Polioptila plumbea	Polioptilidae	42.1	412
Bulweria bulwerii	Bulweria bulwerii	Procellariidae	37.8	412
Daption capensis	Daption capense	Procellariidae	40.6	412
Fulmarus glacialis	Fulmarus glacialis	Procellariidae			9	419
Macronectes giganteus	Macronectes giganteus	Procellariidae	40.6	412
Pachyptila turtur	Pachyptila turtur	Procellariidae	39.9	479
Pagodroma nivea	Pagodroma nivea	Procellariidae	39.6	412
Procellaria aequinoctialis	Procellaria aequinoctialis	Procellariidae	40.8	412
Pterodroma hypoleuca	Pterodroma hypoleuca	Procellariidae	38.5	412
Puffinus nativitatis	Puffinus nativitatis	Procellariidae	38.4	412
Puffinus pacificus	Puffinus pacificus	Procellariidae	39	412
Puffinus teniurostris	Puffinus tenuirostris	Procellariidae	40.9	479
Prunella modularis	Prunella modularis	Prunellidae	41.6	412
Agapornis fischeri	Agapornis fischeri	Psittacidae			27.3	480	34	480
Agapornis nigrigenis	Agapornis nigrigenis	Psittacidae			32	480	35	480
Agapornis personatus	Agapornis personatus	Psittacidae			28	480	34	480
Agapornis pullanius	Agapornis pullarius	Psittacidae	41.1	412
Agapornis roseicollis	Agapornis roseicollis	Psittacidae			27.5	480	30.5	480
Amazona viridigenalis	Amazona viridigenalis	Psittacidae			26.5	481	35	481
Bolborhynchus lineola	Bolborhynchus lineola	Psittacidae			28	482
Cyanoliseus patagonus	Cyanoliseus patagonus	Psittacidae			15	483	30	483
Cyanoramphus auriceps	Cyanoramphus auriceps	Psittacidae			22	484
Cyanoramphus novaezelandiae	Cyanoramphus novaezelandiae	Psittacidae			22	484
Cyanoramphus unicolor	Cyanoramphus unicolor	Psittacidae			18	484
Melopsittacus undulatus	Melopsittacus undulatus	Psittacidae			29	485	41	485
Myiopsitta monachus	Myiopsitta monachus	Psittacidae			24.5	486	38.5	486
Neophema pulchella	Neophema pulchella	Psittacidae			28.3	480
Neophema splendida	Neophema splendida	Psittacidae			26	480
Phainopepla nitens	Phainopepla nitens	Ptiliogonatidae	41.9	412
Aimophila aestivalis	Aimophila aestivalis	Ptilonorhynchidae	42.1	412
Pycnonotus sinensis	Pycnonotus sinensis	Pycnonotidae			25	487	33	487
Aramides cajanea	Aramides cajanea	Rallidae			30	488
Coturnix chinensis	Coturnix chinensis	Rallidae			27	473, 489
Fulica americana	Fulica americana	Rallidae	40.9	412
Fulica atra	Fulica atra	Rallidae			20	490	34	490
Gallirallus australis	Gallirallus australis	Rallidae			30	488
Gallirallus owstoni	Gallirallus owstoni	Rallidae			29	488
Gallirallus philippensis	Gallirallus philippensis	Rallidae			18	488
Megacrex inepta	Megacrex inepta	Rallidae			18	488
Porphyrio hochstetteri	Porphyrio hochstetteri	Rallidae			9	488
Porphyrio porphyrio	Porphyrio porphyrio	Rallidae			14	488
Rallus virginianus	Rallus limicola	Rallidae	40.9	412
Aulacorhynchus prasinus	Aulacorhynchus prasinus	Ramphastidae			23	425
Aulacorhynchus sulcatus	Aulacorhynchus sulcatus	Ramphastidae			23	425
Pteroglossus aracari	Pteroglossus aracari	Ramphastidae			29	425
Pteroglossus bailloni	Pteroglossus bailloni	Ramphastidae			19	425
Ramphastos dicolorus	Ramphastos dicolorus	Ramphastidae			20	425
Ramphastos toco	Ramphastos toco	Ramphastidae			17	425
Ramphastos tucanus	Ramphastos tucanus	Ramphastidae			25	425
Selenidera maculirostris	Selenidera maculirostris	Ramphastidae			24	425
Himantopus mexicanus	Himantopus mexicanus	Recurvirostridae	41	412
Recurvirostra americana	Recurvirostra americana	Recurvirostridae	41	412
Regulus calendula	Regulus calendula	Regulidae	42.1	412
Regulus regulus	Regulus regulus	Regulidae	39.5	412
Regulus satrapa	Regulus satrapa	Regulidae	41.9	412
Auriparus flaviceps	Auriparus flaviceps	Remizidae	41.6	412
Rhipidura albolimbata	Rhipidura albolimbata	Rhipiduridae			19	413
Rhipidura atra	Rhipidura atra	Rhipiduridae			13	413	29	413
Arenaria interpres	Arenaria interpres	Scolopacidae	40.2	412
Calidris alba	Calidris alba	Scolopacidae	39.8	412
Calidris alpina	Calidris alpina	Scolopacidae	41.6	412
Calidris bairdii	Calidris bairdii	Scolopacidae	42.2	412
Calidris canutus	Calidris canutus	Scolopacidae	40.1	412
Calidris ferruginea	Calidris ferruginea	Scolopacidae	40.2	412
Calidris himantopus	Calidris himantopus	Scolopacidae	38	412
Calidris mauri	Calidris mauri	Scolopacidae	41.9	412
Calidris melanotus	Calidris melanotos	Scolopacidae	41.7	412
Calidris minutilla	Calidris minutilla	Scolopacidae	41.4	412
Calidris ruficollis	Calidris ruficollis	Scolopacidae	40.2	412
Gallinago gallinago	Gallinago gallinago	Scolopacidae	39.1	412
Limnodromus griseus	Limnodromus griseus	Scolopacidae	41.1	412
Limosa fedoa	Limosa fedoa	Scolopacidae	40.9	412
Limosa haemastica	Limosa haemastica	Scolopacidae	39	412
Limosa lapponica	Limosa lapponica	Scolopacidae	40.9	412
Limosa limosa	Limosa limosa	Scolopacidae	39.6	412
Numenius americanus	Numenius americanus	Scolopacidae	40.9	412
Numenius arquata	Numenius arquata	Scolopacidae	39.2	412
Numenius phaeopus	Numenius phaeopus	Scolopacidae	39.9	412
Phalaropus tricolor	Steganopus tricolor	Scolopacidae	41.1	412
Tringa flavipes	Tringa flavipes	Scolopacidae	41.4	412
Tringa glareola	Tringa glareola	Scolopacidae	41.3	412
Tringa macularia	Actitis macularius	Scolopacidae	42.4	412
Tringa melanoleucus	Tringa melanoleuca	Scolopacidae	41.5	412
Tringa solitaria	Tringa solitaria	Scolopacidae	42.8	412
Tringa totanus	Tringa totanus	Scolopacidae	41.3	412
Sitta canadensis	Sitta canadensis	Sittidae	42.2	412	28	491	38	491
Sitta carolinensis	Sitta carolinensis	Sittidae	42.2	412
Sitta pusilla	Sitta pusilla	Sittidae	41.7	412
Eudyptula minor	Eudyptula minor	Spheniscidae	39	492	16	493
Megadyptes antipodes	Megadyptes antipodes	Spheniscidae	37.8	412
Pygoscelis adeliae	Pygoscelis adeliae	Spheniscidae	38	412
Pygoscelis papua	Pygoscelis papua	Spheniscidae	38.1	423
Catharacta skua	Catharacta skua	Stercorariidae	41.2	412
Aegolius acadicus	Aegolius acadicus	Strigidae			24	494	32	494
Aegolius funereus	Aegolius funereus	Strigidae			10	495	25	495
Asio flammeus	Asio flammeus	Strigidae	39	412
Asio otus	Asio otus	Strigidae	40.1	412
Athene cuncularia	Athene cunicularia	Strigidae	40.4	412	25	496	37	496
Bubo virginianus	Bubo virginianus	Strigidae	40.8	423	20.3	497	32.2	497
Bubulcus (Ardeola) ibis	Bubulcus ibis	Strigidae	40.5	412
Glaucidium gnoma	Glaucidium gnoma	Strigidae			27	498
Megascops asio	Megascops asio	Strigidae	39.6	412	26	498	34	498
Megascops trichopsis	Megascops trichopsis	Strigidae			27	498
Micrathene whitneyi	Micrathene whitneyi	Strigidae			33	498	38	498
Otus flammeolus	Otus flammeolus	Strigidae	39.2	412
Otus leucotis	Otus leucotis	Strigidae			20	499
Ptiloris magnificus	Ptiloris magnificus	Strigidae			22	435
Strix aluco	Strix aluco	Strigidae			16	500
Strix occidentalis	Strix occidentalis	Strigidae			17	497	25.2	497
Nestor meridionalis	Nestor meridionalis	Strigopidae			15	484
Nestor notabilis	Nestor notabilis	Strigopidae			5	484
Struthio camelus	Struthio camelus	Struthionidae	39.1	412
Acridotheres cristatellus	Acridotheres cristatellus	Sturnidae			25	501	32.5	501
Onychognathus morio	Onychognathus morio	Sturnidae			15	502
Onychognathus tristramii	Onychognathus tristramii	Sturnidae			21.5	503
Sturnus vulgaris	Sturnus vulgaris	Sturnidae	41.5	412	29.5	503	36.5	503
Morus bassanus	Morus bassanus	Sulidae	41.4	412
Sula dactylatra	Sula dactylatra	Sulidae	40.7	412
Chamaea fasicata	Chamaea fasciata	Sylviidae	41.9	412
Sylvia atricapilla	Sylvia atricapilla	Sylviidae	40.8	412
Sylvia borin	Sylvia borin	Sylviidae	41.2	412
Sylvia communis	Sylvia communis	Sylviidae	41.2	412
Sylvia curruca	Sylvia curruca	Sylviidae	40.5	412
Sylvia nisoria	Sylvia nisoria	Sylviidae	39.6	412
Hylophylax naevioides	Hylophylax naevioides	Thamnophilidae			30	504
Wilsonia canadensis	Wilsonia canadensis	Thamnophilidae	41.9	412
Wilsonia citrina	Wilsonia citrina	Thamnophilidae	43.1	412
Wilsonia pusilla	Wilsonia pusilla	Thamnophilidae	41.8	412
Thinocorus rumicivorus	Thinocorus rumicivorus	Thinocoridae			33	505	38	505
Coereba flaveola	Coereba flaveola	Thraupidae			25	506
Cyanerpes cyaneus	Cyanerpes cyaneus	Thraupidae			25	507
Porphyrospiza caerulescens	Porphyrospiza caerulescens	Thraupidae	42.2	412
Sporophila corvina	Sporophila corvina	Thraupidae			28.9	508	39.2	508
Botarurus lentiginosus	Botaurus lentiginosus	Threskiornithidae	40	412
Eudocimus albus	Eudocimus albus	Threskiornithidae	40.2	412
Nothoprocta perdicaria	Nothoprocta perdicaria	Tinamidae			10	509
Nothura maculosa	Nothura maculosa	Tinamidae	40.5	412
Todus mexicanus	Todus mexicanus	Todidae			29	510	32	510
Amazilia versicolor	Amazilia versicolor	Trochilidae	36.8	412
Aphantochroa cirrochloris	Aphantochroa cirrochloris	Trochilidae	44.6	412
Archilochus alexandri	Archilochus alexandri	Trochilidae	39.4	412
Archilochus colubris	Archilochus colubris	Trochilidae	39.9	412
Calypte anna	Calypte anna	Trochilidae	41.9	412
Colibri serrirostris	Colibri serrirostris	Trochilidae	42.5	412
Cynanthus latirostris	Cynanthus latirostris	Trochilidae	41.1	412
Eupetomena macroura	Eupetomena macroura	Trochilidae	40.6	412
Hylocharis cyanus	Hylocharis cyanus	Trochilidae	38.8	412
Lampornis clemenciae	Lampornis clemenciae	Trochilidae	37.7	412
Oreotrochilus estella	Oreotrochilus estella	Trochilidae	38.3	412
Polytmus guainumbi	Polytmus guainumbi	Trochilidae	41	412
Selasphorus platycercus	Selasphorus platycercus	Trochilidae	38.6	412
Selasphorus rufus	Selasphorus rufus	Trochilidae	39	412
Stercorarius (Catharacta) chilensis	Catharacta chilensis	Trochilidae	41.2	412
Stercorarius (Catharacta) maccormicki	Catharacta maccormicki	Trochilidae	41.2	412
Thalurania furcata	Thalurania furcata	Trochilidae	39.6	412
Urosticte benjamini	Urosticte benjamini	Trochilidae	39	412
Campylorynchus brunneicappillus	Campylorhynchus brunneicapillus	Troglodytidae	42.5	412
Catherpes mexicanus	Catherpes mexicanus	Troglodytidae	42.2	412
Catoptrophorus semipalmatus	Catoptrophorus semipalmatus	Troglodytidae	41.5	412
Cistothorus palustris	Cistothorus palustris	Troglodytidae	41.4	412
Thryothorus ludovicianus	Thryothorus ludovicianus	Troglodytidae	42.55	412	27	511
Troglodytes aedon	Troglodytes aedon	Troglodytidae	41.2	412
Troglodytes troglodytes	Troglodytes troglodytes	Troglodytidae	41.8	412
Catharus fuscescens	Catharus fuscescens	Turdidae	42.8	412
Catharus guttatus	Catharus guttatus	Turdidae	42.5	412
Catharus minimus	Catharus minimus	Turdidae	42.8	412
Catharus ustulatus	Catharus ustulatus	Turdidae	43	412
Hylocichla mustelina	Hylocichla mustelina	Turdidae	42.8	412
Myadestes townsendi	Myadestes townsendi	Turdidae	42.9	412
Sialia currucoides	Sialia currucoides	Turdidae	42.2	412
Sialia mexicana	Sialia mexicana	Turdidae	43.1	412
Sialia sialis	Sialia sialis	Turdidae	42.3	412
Turdus iliacus	Turdus iliacus	Turdidae	40.5	412
Turdus migratorius	Turdus migratorius	Turdidae	43.2	412
Turdus philomelus	Turdus philomelos	Turdidae	42.8	412
Turdus poliocephalus	Turdus poliocephalus	Turdidae			15	413
Turnix suscitator	Turnix suscitator	Turnicidae			33	489
Contopus cooperi	Contopus cooperi	Tyrannidae	42.6	412
Contopus pertinax	Contopus pertinax	Tyrannidae	43.5	412
Contopus sordidulus	Contopus sordidulus	Tyrannidae	43.2	412
Contopus virens	Contopus virens	Tyrannidae	42.7	412
Dendragapus canadensis	Dendragapus canadensis	Tyrannidae	42	412
Empidonax difficilis	Empidonax difficilis	Tyrannidae	42.3	412
Empidonax flaviventris	Empidonax flaviventris	Tyrannidae	42.3	412
Empidonax hammondi	Empidonax hammondii	Tyrannidae	41.7	412
Empidonax minimus	Empidonax minimus	Tyrannidae	42.2	412
Empidonax trailli	Empidonax traillii	Tyrannidae	42.4	412
Empidonax virescens	Empidonax virescens	Tyrannidae	42.7	412
Empidonax wrighti	Empidonax wrightii	Tyrannidae	42.4	412
Myiarchus cinerascens	Myiarchus cinerascens	Tyrannidae	43.3	412
Myiarchus tuberculifer	Myiarchus tuberculifer	Tyrannidae	43.3	412
Philomachus pugnax	Philomachus pugnax	Tyrannidae	40.3	412
Pyrocephalus rubinus	Pyrocephalus rubinus	Tyrannidae	42.6	412
Sayornis nigricans	Sayornis nigricans	Tyrannidae	43.1	412
Sayornis phoebe	Sayornis phoebe	Tyrannidae	43.3	412
Tyrannus tyrannus	Tyrannus tyrannus	Tyrannidae	42.1	412
Tyrannus verticalis	Tyrannus verticalis	Tyrannidae	42.5	412
Tyrannus vociferans	Tyrannus vociferans	Tyrannidae	42	412
Tyto alba	Tyto alba	Tytonidae	39.8	412	22.5	512	32.5	512
Padda oryzivora	Padda oryzivora	Vireonidae			31	448
Vireo belli	Vireo bellii	Vireonidae	41.6	412
Vireo flavifrons	Vireo flavifrons	Vireonidae	42.2	412
Vireo gilvus	Vireo gilvus	Vireonidae	42	412
Vireo griseus	Vireo griseus	Vireonidae	41.9	412
Vireo huttoni	Vireo huttoni	Vireonidae	42.2	412
Vireo olivaceus	Vireo olivaceus	Vireonidae	42.9	412
Vireo philadelphia	Vireo philadelphicus	Vireonidae	41.8	412
Vireo solitarius	Vireo solitarius	Vireonidae	42	412
Zenaida (Zeniadura) macroura	Zenaida macroura	Zeledoniidae	42.5	412	30	465	37.5	465
Zosterops lateralis	Zosterops lateralis	Zosteropidae			29	513

## Sheet: Mammals
Species	Species name in tree	Family	Ta	Ta-References	UTmin	UTmin-References	UTmax	UTmax-References
Caenolestes (obscurus) fuliginosus	Caenolestes fuliginosus	Caenolestidae	35.4	412
Caluromys derbianus	Caluromys derbianus	Didelphidae	35	514	26.36	515
Fossa fossana	Fossa fossana	Eupleridae	37.9	514	26	516
Galago senegalensis	Galago senegalensis	Galagidae	37.9	514
Ailurus fulgens	Ailurus fulgens	Ailuridae	37.6	514	25	517
Aotus trivirgatus	Aotus trivirgatus	Aotidae	38	514	28	518	30	518
Aplodontia rufa	Aplodontia rufa	Aplodontiidae	38	514	26.5	519
Balaenoptera physalus	Balaenoptera physalus	Balaenopteridae	36.6	412
Bathyergus janetta	Bathyergus janetta	Bathyergidae	34.7	514
Bathyergus suillus	Bathyergus suillus	Bathyergidae	35.3	514
Cryptomys (hottentotus) amatus	Cryptomys hottentotus	Bathyergidae	34.4	514	28	520	32	520
Cryptomys amatus	Cryptomys amatus	Bathyergidae	35	514
Cryptomys bocagei	Cryptomys bocagei	Bathyergidae	33.7	514	31.5	520
Cryptomys damarensis	Cryptomys damarensis	Bathyergidae	35.2	514	27	521	31	521
Cryptomys darlingi	Cryptomys darlingi	Bathyergidae	33.3	514
Cryptomys mechowi	Cryptomys mechowi	Bathyergidae	34	514	29	520
Georychus capensis	Georychus capensis	Bathyergidae	36.4	514	26.3	522	34	522
Heliophobius argenteocinereus	Heliophobius argenteocinereus	Bathyergidae	35.1	514	28	523	33	523
Hemiechinus auritus	Hemiechinus auritus	Bathyergidae	33.8	514
Heterocephalus glaber	Heterocephalus glaber	Bathyergidae	32.1	514	31	523
Bos taurus	Bos taurus	Bovidae	38.4	514
Bubalus bubalis	Bubalus bubalis	Bovidae	38	412
Capra hircus	Capra hircus	Bovidae	39.5	412	9	524, 525
Kobus ellipsiprymnus	Kobus ellipsiprymnus	Bovidae			13	526
Madoqua kirkii	Madoqua kirkii	Bovidae			25	527
Malacothrix typica	Malacothrix typica	Bovidae	37	514
Manis crassicaudata	Manis crassicaudata	Bovidae	33.4	514
Manis javanica	Manis javanica	Bovidae	32.3	514
Manis pentadactyla	Manis pentadactyla	Bovidae	33.4	514
Manis tetradactyla	Manis tetradactyla	Bovidae	33	514
Manis tricuspis	Manis tricuspis	Bovidae	32.6	514
Philantomba monticola	Philantomba monticola	Bovidae			26	528
Phodopus sungorus	Phodopus sungorus	Bovidae	36.1	514	20	529
Rattus fuscipes	Rattus fuscipes	Bovidae	37.5	514	28.1	530
Bradypus tridactylus	Bradypus tridactylus	Bradypodidae	31.5	412
Bradypus variegatus	Bradypus variegatus	Bradypodidae	33	514	18	531
Acrobates pygmaeus	Acrobates pygmaeus	Burramyidae	34.7	514	34	532
Burramys parvus	Burramys parvus	Burramyidae	36.1	514
Cercartetus concinnus	Cercartetus concinnus	Burramyidae	34.4	514	28	533
Cercartetus lepidus	Cercartetus lepidus	Burramyidae	33.7	514	29	533	33	533
Cercartetus nanus	Cercartetus nanus	Burramyidae	35.6	514	31	534	35	534
Callithrix geoffroyi	Callithrix geoffroyi	Callitrichidae			20	428
Callithrix pygmaea	Callithrix pygmaea	Callitrichidae			27	535
Camelus dromedarius	Camelus dromedarius	Camelidae	37.2	514
Alopex lagopus	Vulpes lagopus	Canidae	38.6	514
Canis latrans	Canis latrans	Canidae	37	514	22	536	26	536
Canis lupus	Canis lupus	Canidae	38.4	412	10	421
Canis mesomelas	Canis mesomelas	Canidae	38	514	22	537
Cerdocyon thous	Cerdocyon thous	Canidae	38.2	514	25	538
Fennecus zerda	Vulpes zerda	Canidae	38.8	514	23.4	539	32	539
Vulpes macrotis	Vulpes macrotis	Canidae	38	514	19	537	33	537
Vulpes vulpes	Vulpes vulpes	Canidae	38.7	514	-10	421
Wallabia bicolor	Wallabia bicolor	Canidae	39.9	412
Wallabia rufogriseus	Macropus rufogriseus	Canidae	37.7	412
Xerus inauris	Xerus inauris	Canidae	36.8	514
Xerus princeps	Xerus princeps	Canidae	37.6	514
Zaedyus pichi	Zaedyus pichiy	Canidae	35.2	514	28	540	35	540
Capromys pilorides	Capromys pilorides	Capromyidae	36.1	514	24	541	37	541
Cavia porcellus	Cavia porcellus	Caviidae	39	514
Dolichotis salinicola	Dolichotis salinicola	Caviidae	38.4	514	28	542
Galea musteloides	Galea musteloides	Caviidae	37.3	514
Kerodon rupestris	Kerodon rupestris	Caviidae	38.2	514	27	542
Sarcophilus harrisii	Sarcophilus harrisii	Cebidae	35.8	514
Scalopus aquaticus	Scalopus aquaticus	Cebidae	36	514	26	519
Cercopithecus mitis	Cercopithecus mitis	Cercopithecidae	37.5	412	5	543	28	543
Colobus guereza	Colobus guereza	Cercopithecidae	37	514	5	543	28	543
Erythrocebus patas	Erythrocebus patas	Cercopithecidae	39.3	412
Alces alces	Alces alces	Cervidae	38.6	514
Cheirogaleus medius	Cheirogaleus medius	Cheirogaleidae	38	514
Microcebus murinus	Microcebus murinus	Cheirogaleidae	36.1	412	25	544
Microdipodops megacephalus	Microdipodops megacephalus	Cheirogaleidae	32.8	514
Microdipodops pallidus	Microdipodops pallidus	Cheirogaleidae	39.3	514
Microgale cowani	Microgale cowani	Cheirogaleidae	33	412
Microgale dobsoni	Microgale dobsoni	Cheirogaleidae	30.9	514
Microgale drouhardi	Microgale drouhardi	Cheirogaleidae	33	514
Microgale talazaci	Microgale talazaci	Cheirogaleidae	31.2	514
Micromys minutus	Micromys minutus	Cheirogaleidae	38	514
Microtus agrestis	Microtus agrestis	Cheirogaleidae	37.6	514
Microtus arvalis	Microtus arvalis	Cheirogaleidae	37	514	20	545
Microtus brandti	Lasiopodomys brandtii	Cheirogaleidae	36.2	412
Microtus breweri	Microtus breweri	Cheirogaleidae	37.3	514
Chinchilla lanigera	Chinchilla lanigera	Chinchillidae	35.7	514
Cabassous centralis	Cabassous centralis	Chlamyphoridae	33.6	514	27.5	540	32.5	540
Chaetophractus nationi	Chaetophractus nationi	Chlamyphoridae	35.5	514	29	540
Chaetophractus vellerosus	Chaetophractus vellerosus	Chlamyphoridae	34.4	514	30	540
Chaetophractus villosus	Chaetophractus villosus	Chlamyphoridae	35.1	514	29	540	35	540
Euphractus sexcinctus	Euphractus sexcinctus	Chlamyphoridae	34.2	514	26	540
Chrysochloris asiatica	Chrysochloris asiatica	Chrysochloridae	34	514
Akodon azarae	Akodon azarae	Cricetidae	37.7	514	30	546
Arborimus longicaudus	Arborimus longicaudus	Cricetidae	37.3	514	27	422	36	422
Arvicola amphibius	Arvicola amphibius	Cricetidae	37.5	514
Auliscomys boliviensis	Auliscomys boliviensis	Cricetidae	36.3	514	22.7	547
Auliscomys micropus	Loxodontomys micropus	Cricetidae	37.4	514	22	547	33	547
Baiomys taylori	Baiomys taylori	Cricetidae	36	514	29	548
Calomys callosus	Calomys callosus	Cricetidae			28	547
Calomys ducilla	Calomys lepidus	Cricetidae			32	547
Calomys musculinus	Calomys musculinus	Cricetidae	36.2	514	27	547
Calomys venustus	Calomys venustus	Cricetidae	37.1	514
Chelemys macronyx	Chelemys macronyx	Cricetidae	36.8	514	26.4	547
Clethrionomys californicus	Myodes californicus	Cricetidae	37.5	514	25	549	33	549
Clethrionomys gapperi	Myodes gapperi	Cricetidae	37.9	412	26	550	34	550
Cricetulus barabensis	Cricetulus barabensis	Cricetidae			27	551
Cricetulus migratorius	Cricetulus migratorius	Cricetidae	38.1	514
Cricetus cricetus	Cricetus cricetus	Cricetidae	39.5	514
Dicrostonyx groenlandicus	Dicrostonyx groenlandicus	Cricetidae	38.4	514	15.5	549
Eligmodontia typus	Eligmodontia typus	Cricetidae	36.4	514	28.9	547
Graomys griseoflavus	Graomys griseoflavus	Cricetidae	36.1	514	25.6	552
Isthmomys pirrensis	Isthmomys pirrensis	Cricetidae	37.6	514	32	553
Lemmus lemmus	Lemmus lemmus	Cricetidae	37.8	514
Lemmus sibericus	lemmus sibiricus	Cricetidae	38.3	412	25	549	32	549
Lemmus trimucronatus	Lemmus trimucronatus	Cricetidae	38.3	514
Lemniscomys griselda	Lemniscomys griselda	Cricetidae	36.9	514
Lemniscomys rosalia	Lemniscomys rosalia	Cricetidae	36.5	514
Lutra lutra	Lutra lutra	Cricetidae	38.1	514
Megadontomys thomasi	Megadontomys thomasi	Cricetidae	37.8	514	28	554	35	554
Melomys lutillus	Melomys lutillus	Cricetidae	37.5	412
Microtus californicus	Microtus californicus	Cricetidae	38.8	514	33	555	40	555
Microtus guentheri	Microtus guentheri	Cricetidae	38.3	514	30	556
Microtus longicaudus	Microtus longicaudus	Cricetidae	38	514	26.5	555	33.5	555
Microtus mexicanus	Microtus mexicanus	Cricetidae	37.9	514
Microtus montanus	Microtus montanus	Cricetidae	35.3	514	26	557
Microtus ochrogaster	Microtus ochrogaster	Cricetidae	37.9	514	25	558
Microtus oeconomus	Microtus oeconomus	Cricetidae	38.4	514	22.5	549
Microtus pennsylvanicus	Microtus pennsylvanicus	Cricetidae	38.5	514	25	559
Microtus pinetorum	Microtus pinetorum	Cricetidae	38.3	514	23	549
Microtus richardsoni	Microtus richardsoni	Cricetidae	38.7	514	22.5	517
Microtus xanthognathus	Microtus xanthognathus	Cricetidae	38	514
Miniopterus australis	Miniopterus australis	Cricetidae	39.1	412
Mustela vison	Neovison vison	Cricetidae	39	514
Myodes rufocanus	Myodes rufocanus	Cricetidae			22.5	560	27.5	560
Myopus schisticolor	Myopus schisticolor	Cricetidae	39	514	20.9	561
Neofiber alleni	Neofiber alleni	Cricetidae	37.1	514	25	549
Neotoma lepida	Neotoma lepida	Cricetidae	36.8	514	31	523
Ochrotomys nuttalli	Ochrotomys nuttalli	Cricetidae	36.4	514	29.5	562
Oligoryzomys longicaudatus	Oligoryzomys longicaudatus	Cricetidae	37.3	514	27.2	547
Ondatra zibethicus	Ondatra zibethicus	Cricetidae	37.4	514	15	549
Onychomys torridus	Onychomys torridus	Cricetidae			30	563	35	563
Oreamnos americanus	Oreamnos americanus	Cricetidae	38.6	514
Ornithorhynchus anatinus	Ornithorhynchus anatinus	Cricetidae	32.1	514
Oxymycterus roberti	Oxymycterus roberti	Cricetidae	38.3	514	33	564
Panthera leo	Panthera leo	Cricetidae	37.9	514
Panthera tigris	Panthera tigris	Cricetidae	37.5	514
Papio anubis	Papio anubis	Cricetidae	37.3	514
Papio hamadryas	Papio hamadryas	Cricetidae	37	514
Papio ursinus	Papio ursinus	Cricetidae	37	412
Peromyscus californicus	Peromyscus californicus	Cricetidae	36.4	514	27	565	34.5	565
Peromyscus crinitus	Peromyscus crinitus	Cricetidae	35.7	514	29	565	35	565
Peromyscus eremicus	Peromyscus eremicus	Cricetidae	36.6	514	30	565
Peromyscus gossypinus	Peromyscus gossypinus	Cricetidae	37.5	514	29.7	562
Peromyscus keeni	Peromyscus keeni	Cricetidae	36.2	514
Peromyscus leucopus	Peromyscus leucopus	Cricetidae	36.7	514	27.5	550
Peromyscus maniculatus	Peromyscus maniculatus	Cricetidae	37.2	514	29	566
Peromyscus polionotus	Peromyscus polionotus	Cricetidae	37.2	514
Peromyscus truei	Peromyscus truei	Cricetidae	36.7	514	27	565	33	565
Phenacomys intermedius	Phenacomys intermedius	Cricetidae	37.9	514	25	549
Phyllotis (darwini) darwini	Phyllotis darwini	Cricetidae	36.2	514	27.5	547	34	547
Phyllotis xanthopygus	Phyllotis xanthopygus	Cricetidae	37.3	514	28.9	547
Rhabdomys pumilio	Rhabdomys pumilio	Cricetidae	37	514
Rhinolophus ferrumequinum	Rhinolophus ferrumequinum	Cricetidae	39.7	412
Rhinolophus hipposideros	Rhinolophus hipposideros	Cricetidae	30.2	412
Rhinonicteris aurantia	Rhinonicteris aurantia	Cricetidae	36.1	514	32.5	567
Ctenomys australis	Ctenomys australis	Ctenomyidae	37.3	514
Ctenomys fulvus	Ctenomys fulvus	Ctenomyidae	36.2	514
Ctenomys maulinus	Ctenomys maulinus	Ctenomyidae	36.2	514
Ctenomys opimus	Ctenomys opimus	Ctenomyidae	36	514
Ctenomys peruanus	Ctenomys peruanus	Ctenomyidae	35.2	514
Ctenomys talarum	Ctenomys talarum	Ctenomyidae	36.1	514	25	568	30	568
Octodontomys gliroides	Octodontomys gliroides	Ctenomyidae	37.2	514	25	542
Agouti paca	Cuniculus paca	Cuniculidae	37.2	514	28	542
Cyclopes didactylus	Cyclopes didactylus	Cyclopedidae	33	514	25	472
Dasypus novemcinctus	Dasypus novemcinctus	Dasypodidae	34.5	514	28	540
Priodontes maximus	Priodontes maximus	Dasypodidae	33.6	514	27	540
Tonatia bidens	Tonatia bidens	Dasypodidae	37	514	28	569
Zaglossus bruijni	Zaglossus bruijni	Dasypodidae	30.8	514	18	472
Dasyprocta acouchy	Myoprocta acouchy	Dasyproctidae	35.4	514	25	542	30	542
Dasyprocta azarae	Dasyprocta azarae	Dasyproctidae	37.5	514	18	542
Dasyprocta leporina	Dasyprocta leporina	Dasyproctidae	38.3	514	20	542
Dasyprocta prymnolopha	Dasyprocta prymnolopha	Dasyproctidae	38.8	412
Antechinomys laniger	Antechinomys laniger	Dasyuridae	35.8	514
Antechinus flavipes	Antechinus flavipes	Dasyuridae	35	514
Antechinus stuartii	Antechinus stuartii	Dasyuridae	35.1	514
Antechinus swainsonii	Antechinus swainsonii	Dasyuridae	36	514
Dasycercus cristicauda	Dasycercus cristicauda	Dasyuridae	36.9	514	30	570	37	570
Dasyuroides byrnei	Dasyuroides byrnei	Dasyuridae	35.2	514
Dasyurus geoffroii	Dasyurus geoffroii	Dasyuridae	36.2	514
Dasyurus hallucatus	Dasyurus hallucatus	Dasyuridae	35.9	514
Dasyurus maculatus	Dasyurus maculatus	Dasyuridae	36.9	514
Dasyurus viverrinus	Dasyurus viverrinus	Dasyuridae	36.6	514
Ningaui yvonnae	Ningaui yvonnae	Dasyuridae	34.4	514	32	571
Planigale gilesi	Planigale gilesi	Dasyuridae	35.1	514	28	571
Planigale maculata	Planigale maculata	Dasyuridae	34.5	514	31	531
Planigale tenuirostris	Planigale tenuirostris	Dasyuridae	34.5	514
Sminthopsis (laripinta) macroura	Sminthopsis macroura	Dasyuridae	36.4	514	31.3	572	34	572
Sminthopsis murina	Sminthopsis murina	Dasyuridae	35	514
Sorex alpinus	Sorex alpinus	Dasyuridae	38.6	514	25	573
Globicephala macrorhynchus	Globicephala macrorhynchus	Delphinidae	35.8	412
Tympanoctomys barrerae	Tympanoctomys barrerae	Delphinidae	35.7	514	24.9	574
Chironectes (panamensis)	Chironectes minimus	Didelphidae	35	514	24.5	515	34	515
Didelphis marsupialis	Didelphis marsupialis	Didelphidae	35	514	25.5	515
Didelphis virginiana	Didelphis virginiana	Didelphidae	35	514	22	515
Gracilinanus microtarsus	Gracilinanus microtarsus	Didelphidae	35	514
Lutreolina crassicaudata	Lutreolina crassicaudata	Didelphidae	35.8	514	27	515
Marmosa lepida	Marmosa lepida	Didelphidae			31	575	35	575
Marmosa robinsoni	Marmosa robinsoni	Didelphidae	34	514	26	515
Marmota caligata	Marmota caligata	Didelphidae	38.3	412
Marmota flaviventris	Marmota flaviventris	Didelphidae	36.5	514
Marmota monax	Marmota monax	Didelphidae	37	514
Metachirus nudicaudatus	Metachirus nudicaudatus	Didelphidae	35	514	27.5	515
Micaelamys namaquensis	Micaelamys namaquensis	Didelphidae	36.8	514	26.39	576	34.49	576
Monodelphis brevicaudata	Monodelphis brevicaudata	Didelphidae	33.7	514	28.76	515
Monodelphis domestica	Monodelphis domestica	Didelphidae	32.6	514
Philander opossum	Philander opossum	Didelphidae	35.8	514	29.5	515
Tolypeutes matacus	Tolypeutes matacus	Didelphidae	33	514	28	515
Dipus sagitta	Dipus sagitta	Dipodidae	36.8	514
Jaculus jaculus	Jaculus jaculus	Dipodidae	37.5	412	33	577	35	577
Jaculus orientalis	Jaculus orientalis	Dipodidae	37	514	28	577	33	577
Napaeozapus insignis	Napaeozapus insignis	Dipodidae	37	514	30	566
Proechimys semispinosus	Proechimys semispinosus	Echimyidae	37.9	514	24.5	428
Proteles cristata	Proteles cristata	Echimyidae	36.4	514
Pseudantechinus macdonnellensis	Pseudantechinus macdonnellensis	Echimyidae	34.2	514
Thylamys elegans	Thylamys elegans	Echimyidae			27.5	578	35	578
Elephas (indicus) maximus	Elephas maximus	Elephantidae	36	412
Peropteryx macrotis	Peropteryx macrotis	Emballonuridae	34.4	514	30.5	579
Saccostomus campestris	Saccostomus campestris	Emballonuridae	35.3	514	28	528
Coendou prehensilis	Coendou prehensilis	Erethizontidae	36.7	514	26	541	34	541
Erethizon dorsata	Erethizon dorsatum	Erethizontidae	37.5	514	0	421	20	421
Atelerix albiventris	Atelerix albiventris	Erinaceidae	35.2	514	30	540
Echinosorex gymnura	Echinosorex gymnura	Erinaceidae	36.3	514
Erinaceus concolor	Erinaceus concolor	Erinaceidae	35.2	514	27.5	580	31.5	580
Erinaceus europaeus	Erinaceus europaeus	Erinaceidae	35.6	514	26	581
Acinonyx jubatus	Acinonyx jubatus	Felidae	39	514
Felis pardalis	Leopardus pardalis	Felidae	38	514	22	582	33	582
Felis serval	Leptailurus serval	Felidae	36.5	514	15	537	30	537
Felis wiedii	Leopardus wiedii	Felidae	38	514	29	582	38	582
Herpestes javanicus	Herpestes javanicus	Felidae	39.8	514
Lynx rufus	Lynx rufus	Felidae			19	582
Macaca fuscata	Macaca fuscata	Felidae			32.5	583
Macacus mulatta	Macaca mulatta	Felidae	39.3	412
Geomys bursaris	Geomys bursarius	Geomyidae	35	514	30	584	33	584
Geomys pinetis	Geomys pinetis	Geomyidae	36.3	514	26	523
Thomomys talpoides	Thomomys talpoides	Geomyidae	36.2	514	26	585	32	585
Thomomys umbrinus	Thomomys umbrinus	Geomyidae	34.6	514	27	585	35	585
Thrichomys apereoides	Thrichomys apereoides	Geomyidae	37.6	514	25	542
Giraffa camelopardalis	Giraffa camelopardalis	Giraffidae	38.5	412
Eliomys quercinus	Eliomys quercinus	Gliridae	38.2	412
Glis (Myoxus) glis	Glis glis	Gliridae	37.7	514
Galerella sanguinea	Galerella sanguinea	Herpestidae	38.7	514	26	586
Sus scrofa	Sus scrofa	Herpestidae			4	587
Syconycteris australis	Syconycteris australis	Herpestidae	35.9	514	29.5	588
Chaetodipus baileyi	Chaetodipus baileyi	Heteromyidae	32.5	514
Chaetodipus californicus	Chaetodipus californicus	Heteromyidae	38	514
Chaetodipus fallax	Chaetodipus fallax	Heteromyidae	32.6	514
Chaetodipus hispidus	Chaetodipus hispidus	Heteromyidae	36.8	514	30.5	589
Chaetodipus intermedius	Chaetodipus intermedius	Heteromyidae	36	514	33	590	36	590
Chaetodipus penicillatus	Chaetodipus penicillatus	Heteromyidae			31	566
Dipodomys agilis	Dipodomys agilis	Heteromyidae	37	514	26	554	36	554
Dipodomys deserti	Dipodomys deserti	Heteromyidae	36.8	514	28.5	519
Dipodomys merriami	Dipodomys merriami	Heteromyidae	37	514	32	591
Dipodomys microps	Dipodomys microps	Heteromyidae	35	514	27	592	32	592
Dipodomys ordii	Dipodomys ordii	Heteromyidae	34.6	514
Dipodomys panamintinus	Dipodomys panamintinus	Heteromyidae	36.9	514	33	591
Dipodomys spectabilis	Dipodomys spectabilis	Heteromyidae	37.4	412
Heteromys anomalus	Heteromys anomalus	Heteromyidae	36	514	26	519
Heteromys desmarestianus	Heteromys desmarestianus	Heteromyidae	33.8	514
Hippopotamus amphibius	Hippopotamus amphibius	Heteromyidae	35.4	412
Liomys irroratus	Liomys irroratus	Heteromyidae	37	514	31	593
Liomys salvani	Liomys salvini	Heteromyidae	37	514	31	593	34	593
Loris tardigradus	Loris tardigradus	Heteromyidae	35.5	514
Loxodonta africana	Loxodonta africana	Heteromyidae	36.2	412
Hipposideros cervinus	Hipposideros cervinus	Hipposideridae			31	594
Hipposideros diadema	Hipposideros diadema	Hipposideridae			29	594
Hipposideros galeritus	Hipposideros galeritus	Hipposideridae	31.9	514	29	595
Hipposideros maggietaylorae	Hipposideros maggietaylorae	Hipposideridae			30	594
Hydrochaeris hydrochaeris	Hydrochoerus hydrochaeris	Hydrochaeridae	37.1	514	22	542	33	542
Hydromys chrysogaster	Hydromys chrysogaster	Hydrochaeridae	36.6	514
Hylomys suillus	Hylomys suillus	Hydrochaeridae	37.3	514
Hystrix africaeaustralis	Hystrix africaeaustralis	Hystricidae	37.5	514	24	596	27	596
Ichneumia albicauda	Ichneumia albicauda	Hystricidae	39.4	412
Isoodon auratus	Isoodon auratus	Hystricidae	33.8	514
Isoodon macrourus	Isoodon macrourus	Hystricidae	35.9	514
Eulemur fulvus	Eulemur fulvus	Lemuridae	36.5	514	30	597
Brachylagus idahoensis	Brachylagus idahoensis	Leporidae			17.5	598	25.5	598
Lepus alleni	Lepus alleni	Leporidae	37.9	514	25	599	35	599
Lepus americanus	Lepus americanus	Leporidae	39.8	514
Lepus arcticus	Lepus arcticus	Leporidae	38.9	514
Lepus californicus	Lepus californicus	Leporidae	39.2	514
Lepus timidus	Lepus timidus	Leporidae	39.7	514
Lepus townsendii	Lepus townsendii	Leporidae	38.2	514
Sylvilagus floridanus	Sylvilagus floridanus	Leporidae	39.4	412
Syncerus caffer	Syncerus caffer	Leporidae	38.7	412
Tachyglossus aculeatus	Tachyglossus aculeatus	Leporidae	30.7	514	18	564	31	564
Nycticebus pygmaeus	Nycticebus pygmaeus	Lorisidae			27.5	600
Perodicticus potto	Perodicticus potto	Lorisidae	36.1	514	25	601
Perognathus alticola	Perognathus alticolus	Lorisidae	34.7	412
Perognathus flavus	Perognathus flavus	Lorisidae	34.6	514
Perognathus longimembris	Perognathus longimembris	Lorisidae	34.7	514
Peromyscus boylii	Peromyscus boylii	Lorisidae	36.4	514
Dendrolagus matschiei	Dendrolagus matschiei	Macropodidae	36.3	514	27	517
Lagorchestes conspicillatus	Lagorchestes conspicillatus	Macropodidae	36	514	25	602	35	602
Lagostomus maximus	Lagostomus maximus	Macropodidae	36.8	514
Lagurus curtatus	Lemmiscus curtatus	Macropodidae	37.1	514	25	517	33	517
Lama glama	Lama glama	Macropodidae	38.7	514
Macropus giganteus	Macropus giganteus	Macropodidae	36	412	15	603, 604
Macropus parryi (Wallabia elegans)	Macropus parryi	Macropodidae	36.7	412
Macropus robustus	Macropus robustus	Macropodidae	36.1	514
Macropus rufus	Macropus rufus	Macropodidae	35.9	514	25	603, 604
Sicista betulina	Sicista betulina	Macropodidae	37	514
Sigmodon hispidus	Sigmodon hispidus	Macropodidae	38.1	514
Sminthopsis crassicaudata	Sminthopsis crassicaudata	Macropodidae	35.2	514	31	571
Elephantulus brachyrhynchus	Elephantulus brachyrhynchus	Macroscelididae	37.5	514
Elephantulus edwardii	Elephantulus edwardii	Macroscelididae	37.6	514	32.5	605	36	605
Elephantulus intufi	Elephantulus intufi	Macroscelididae	37.2	514
Elephantulus myurus	Elephantulus myurus	Macroscelididae	36.9	514
Elephantulus rozeti	Elephantulus rozeti	Macroscelididae	37.1	514
Elephantulus rufescens	Elephantulus rufescens	Macroscelididae	37.3	514	33	564
Macroscelides proboscideus	Macroscelides proboscideus	Macroscelididae	36.2	514	35	606
Macroderma gigas	Macroderma gigas	Megadermatidae	37	514	30	567, 607	35	567, 607
Choloepus hoffmanni	Choloepus hoffmanni	Megalonychidae	34.4	514	24	541
Steatomys pratensis	Steatomys pratensis	Mephitidae	34.1	514	28	608
Eumops perotis	Eumops perotis	Molossidae	32.6	514
Molossus molossus	Molossus molossus	Molossidae	31.4	514	32	569
Tamandua mexicana	Tamandua mexicana	Molossidae	32	514	19	564
Mormoops blainvillei	Mormoops blainvillei	Mormoopidae	32	514	30	609
Mormoops megalophylla	Mormoops megalophylla	Mormoopidae	36.9	514	33.5	610
Muntiacus (Cervulus) muntjac	Muntiacus muntjak	Mormoopidae	38.6	412
Pteronotus parnellii	Pteronotus parnellii	Mormoopidae	36.4	514	34	610
Pteronotus personatus	Pteronotus personatus	Mormoopidae	37.5	514	34	610
Pteronotus quadridens	Pteronotus quadridens	Mormoopidae	31	514	30	609	38	609
Pteropus giganteus	Pteropus giganteus	Mormoopidae	36.7	514
Pteropus hypomelanus	Pteropus hypomelanus	Mormoopidae	35.7	514
Pteropus poliocephalus	Pteropus poliocephalus	Mormoopidae	36.5	514	15	611
Abrothrix andinus	Abrothrix andinus	Muridae	37.7	514	26.8	547	34	547
Abrothrix longipilis	Abrothrix longipilis	Muridae	37.4	514	27.3	547	32	547
Abrothrix olivaceus	Abrothrix olivaceus	Muridae	37.2	514	26.3	547
Acomys cahirinus	Acomys cahirinus	Muridae	37.5	514	27	612
Acomys russatus	Acomys russatus	Muridae	37.3	514	33	613	37	613
Apodemus agrarius	Apodemus agrarius	Muridae			25	560	27.5	560
Apodemus flavicollis	Apodemus flavicollis	Muridae	36.7	514
Apodemus hermonensis	Apodemus witherbyi	Muridae	37	514
Apodemus mystacinus	Apodemus mystacinus	Muridae	35.5	514	28	614
Apodemus speciosus	Apodemus speciosus	Muridae			25	560	30	560
Apodemus sylvaticus	Apodemus sylvaticus	Muridae	36.7	514
Desmodillus auricularis	Desmodillus auricularis	Muridae	35.9	514
Dipodillus dasyurus	Dipodillus dasyurus	Muridae	38.6	514	32	615
Gerbilliscus afra	Gerbilliscus afra	Muridae	34	514
Gerbilliscus leucogaster	Gerbilliscus leucogaster	Muridae	35.1	514
Gerbillurus paeba	Gerbillurus paeba	Muridae	38.7	514	32.3	576	35.1	576
Gerbillurus setzeri	Gerbillurus setzeri	Muridae	37.6	514	32.2	616	34.8	616
Gerbillurus tytonis	Gerbillurus tytonis	Muridae	36.9	514	32.4	617	34.9	617
Gerbillurus vallinus	Gerbillurus vallinus	Muridae	37.4	514	33.1	618	35	618
Gerbillus andersoni	Gerbillus andersoni	Muridae	36.3	514	28	619
Gerbillus gerbillus	Gerbillus gerbillus	Muridae	37.2	514
Gerbillus nanus	Gerbillus nanus	Muridae	38.8	514	33	619
Gerbillus pusillus	Gerbillus pusillus	Muridae	34.6	514	31.4	554	38	554
Gerbillus pyramidum	Gerbillus pyramidum	Muridae	36.1	514	30	620
Meriones unguiculatus	Meriones unguiculatus	Muridae	38.2	514	30	620
Mesocricetus auratus	Mesocricetus auratus	Muridae	38.1	514
Mesocricetus brandti	Mesocricetus brandti	Muridae	36.2	514
Mus macedonicus	Mus macedonicus	Muridae			28	621
Mus minutoides	Mus minutoides	Muridae	36.3	514
Mus musculus	Mus musculus	Muridae	36.7	514	27	554
Muscardenis avellanarius	Muscardinus avellanarius	Muridae	35.8	514
Mustela erminea	Mustela erminea	Muridae	39.6	514
Mustela frenata	Mustela frenata	Muridae	39	514
Mustela furo	Mustela putorius	Muridae	39.5	412
Mustela rixosa	Mustela nivalis	Muridae	40.4	412
Myocastor (Myopotamus) coypus	Myocastor coypus	Muridae	38	412
Notomys alexis	Notomys alexis	Muridae	38	514	32	622	34	622
Notomys cervinus	Notomys cervinus	Muridae	38.5	514	33	622	34	622
Notoryctes caurinus	Notoryctes caurinus	Muridae	30.8	514
Nycticebus coucang	Nycticebus coucang	Muridae	35.4	514	25	623	33	623
Otomys irroratus	Otomys irroratus	Muridae	37.6	514	24	624	28	624
Ovis aries	Ovis aries	Muridae	39.4	412
Pteronotus davyi	Pteronotus davyi	Muridae	38.8	514	34.5	610
Rattus (conatus) sordidus	Rattus sordidus	Muridae	39	514
Rattus lutreolis	Rattus lutreolus	Muridae	36.7	514
Rattus norvegicus	Rattus norvegicus	Muridae	37.2	514
Rattus rattus	Rattus rattus	Muridae			26.25	625	33	625
Rattus villosissimus	Rattus villosissimus	Muridae	35.9	514	30	625	35	625
Reithrodon auritus	Reithrodon auritus	Muridae	38	514
Reithrodontomys megalotis	Reithrodontomys megalotis	Muridae	36.8	514	32	626
Thomomys bottae	Thomomys bottae	Muridae	36	514	28	627	30	627
Eira barbara	Eira barbara	Mustelidae	38.4	514	26	516
Enhydra lutris	Enhydra lutris	Mustelidae	38.5	514
Galictis (barbara) cuja	Galictis cuja	Mustelidae	40.1	412
Galictis vittata	Galictis vittata	Mustelidae	38.3	412
Martes americana	Martes americana	Mustelidae	38	514	26	628
Mastomys natalensis	Mastomys natalensis	Mustelidae	38	514
Mazama rufina	Mazama rufina	Mustelidae	38.2	412
Myrmecobius fasciatus	Myrmecobius fasciatus	Myrmecobiidae	32.5	514			30	564
Myrmecophaga tridactyla	Myrmecophaga tridactyla	Myrmecobiidae	32.5	514
Tamandua tetradactyla	Tamandua tetradactyla	Myrmecophagidae	33.5	514	23	564
Tamias amoenus	Tamias amoenus	Myrmecophagidae	37	514
Tamias merriami	Tamias merriami	Myrmecophagidae	37	514	29	629
Nandinia binotata	Nandinia binotata	Nandiniidae	37.4	514	27	516
Natalus tumidirostris	Natalus tumidirostris	Natalidae	32.2	514	28	579
Cricetomys gambianus	Cricetomys gambianus	Nesomyidae	35.6	514
Mystromys albicaudatus	Mystromys albicaudatus	Nesomyidae	33	514	20	630	30	630
Saimiri sciureus	Saimiri sciureus	Nesomyidae	38	514	25	631, 632
Sturnira erythromos	Sturnira erythromos	Nesomyidae			25.5	633	32.5	633
Noctilio albiventris	Noctilio albiventris	Noctilionidae	33.8	514	32	569
Noctilio leporinus	Noctilio leporinus	Noctilionidae	34.5	514	28	569	38	569
Aconaemys fuscus	Aconaemys fuscus	Octodontidae	37.3	514
Nannospalax leucodon	Spalax leucodon	Octodontidae	36.3	514	25	523	34	523
Octodon bridgesi	Octodon bridgesi	Octodontidae			22	634, 635	32.5	634, 635
Octodon degus	Octodon degus	Octodontidae	37.6	514	27	542
Octodon lunatus	Octodon lunatus	Octodontidae			23	634, 635	33	634, 635
Octomys mimax	Octomys mimax	Octodontidae	36.7	514	22.2	574
Odobenus rosmarus	Odobenus rosmarus	Octodontidae	36.4	412
Odocoileus hemionus	Odocoileus hemionus	Octodontidae	38.3	412
Odocoileus virginianus	Odocoileus virginianus	Octodontidae	39	514
Spalax ehrenbergi	Spalax ehrenbergi	Octodontidae	36	514
Uroderma bilobatum	Uroderma bilobatum	Octodontidae	35.1	514	30	569	Vulpes vulpes
Orycteropus afer	Orycteropus afer	Orycteropodidae	34.5	514	27	564	35	564
Oryctolagus cuniculus	Oryctolagus cuniculus	Orycteropodidae	39	514
Oryx (beisa) gazella	Oryx beisa	Orycteropodidae	38.5	412
Otolemur (Galago) crassicaudatus	Otolemur crassicaudatus	Orycteropodidae	38	514
Callorhinus ursinus	Callorhinus ursinus	Otariidae			5.4	636
Eumetopias jubata	Eumetopias jubatus	Otariidae	38.5	412
Zapus hudsonicus	Zapus hudsonius	Otariidae	37.3	514
Zapus princeps	Zapus princeps	Otariidae	36.6	412
Pedetes capensis	Pedetes capensis	Pedetidae	35.9	514	23	637
Perameles gunni	Perameles gunnii	Pedetidae	35.2	514
Perameles nasuta	Perameles nasuta	Pedetidae	36.1	514
Echymipera (rufescens) australis	Echymipera rufescens	Peramelidae	35.2	514
Echymipera kalubu	Echymipera kalubu	Peramelidae	35	514
Isoodon obesulus	Isoodon obesulus	Peramelidae	33.9	514	25	638
Macrotis lagotis	Macrotis lagotis	Peramelidae	35	514	27	639	35	639
Macrotus californicus	Macrotus californicus	Peramelidae	35	514
Petaurus breviceps	Petaurus breviceps	Petauridae	36.4	514	27	603, 640	31	603, 640
Petaurus norfolcensis	Petaurus norfolcensis	Petauridae	36.3	412
Petrodromus tetradactylus	Petrodromus tetradactylus	Petauridae	37.5	514
Phalanger carmelitae	Phalanger carmelitae	Phalangeridae			12.5	641
Phalanger gymnotis	Phalanger gymnotis	Phalangeridae			25	641	33	641
Phalanger intercastellanus	Phalanger intercastellanus	Phalangeridae			13	641	30	641
Phalanger orientalis	Phalanger orientalis	Phalangeridae			20	641	32	641
Phalanger sericeus	Phalanger sericeus	Phalangeridae			15	641
Phascogale tapoatafa	Phascogale tapoatafa	Phalangeridae	37.4	514
Spilogale putorius	Spilogale putorius	Phalangeridae	36.4	514	30	642	36	642
Phascolarctos cinereus	Phascolarctos cinereus	Phascolarctidae	35.8	514	20	643	26	643
Erignathus barbatus	Erignathus barbatus	Phocidae	37.2	412
Halichoerus grypus	Halichoerus grypus	Phocidae			-11	644
Anoura caudifer	Anoura caudifer	Phyllostomidae	36.5	514	26	569
Anoura latidens	Anoura latidens	Phyllostomidae			34.7	633
Artibeus cinereus	Artibeus cinereus	Phyllostomidae			28	569	34	569
Artibeus concolor	Artibeus concolor	Phyllostomidae	35.3	514	29	569
Artibeus jamaicensis	Artibeus jamaicensis	Phyllostomidae	36.4	514	25	569	35	569
Artibeus lituratus	Artibeus lituratus	Phyllostomidae	37.3	514	25	569	36	569
Carollia perspicillata	Carollia perspicillata	Phyllostomidae	36.4	514	29	569	35	569
Choeroniscus godmani	Choeroniscus godmani	Phyllostomidae			32	645
Choeroniscus periosus	Choeroniscus periosus	Phyllostomidae			28.2	569
Chrotopterus auritus	Chrotopterus auritus	Phyllostomidae	37.2	514	28	569
Desmodus rotundus	Desmodus rotundus	Phyllostomidae	37.3	514	29	569
Diaemus youngi	Diaemus youngi	Phyllostomidae	31.1	514	25	569
Diphylla ecaudata	Diphylla ecaudata	Phyllostomidae	32.4	514	26	569	30	569
Erophylla bombifrons	Erophylla bombifrons	Phyllostomidae	32	514	30	609
Erophylla sezekorni	Erophylla sezekorni	Phyllostomidae	39.3	514
Glossophaga longirostris	Glossophaga longirostris	Phyllostomidae			31.5	645
Glossophaga soricina	Glossophaga soricina	Phyllostomidae	35.5	514	31.4	646	35.2	646
Leptonycteris curasoae	Leptonycteris curasoae	Phyllostomidae	35.7	514	27	645
Leptonycteris yerbabuenae	Leptonycteris yerbabuenae	Phyllostomidae			35.5	645
Monophyllus redmani	Monophyllus redmani	Phyllostomidae	34	514	31	609
Phyllostomus discolor	Phyllostomus discolor	Phyllostomidae	34.6	514	25	569	37	569
Phyllostomus elongatus	Phyllostomus elongatus	Phyllostomidae			25	569
Phyllostomus hastatus	Phyllostomus hastatus	Phyllostomidae	34.7	514	25	569	35	569
Platyrrhinus lineatus	Platyrrhinus lineatus	Phyllostomidae	36.4	514	30	569
Plecotus auritus	Plecotus auritus	Phyllostomidae	35.5	514
Rousettus aegyptiacus	Rousettus aegyptiacus	Phyllostomidae	34.8	514
Rousettus amplexicaudatus	Rousettus amplexicaudatus	Phyllostomidae	36.5	514	27	437
Sturnira lilium	Sturnira lilium	Phyllostomidae	36.4	514	30	569
Suncus etruscus	Suncus etruscus	Phyllostomidae	38.7	514
Suncus murinus	Suncus murinus	Phyllostomidae	36	514
Suricata suricatta	Suricata suricatta	Phyllostomidae	36.3	514	30	647	33	647
Tragulus javanicus	Tragulus javanicus	Phyllostomidae			26.6	648	29	648
Uromys caudimaculatus	Uromys caudimaculatus	Phyllostomidae	37.1	514
Ursus americanus	Ursus americanus	Phyllostomidae	38.3	412
Ursus arctos	Ursus arctos	Phyllostomidae	38	412
Ursus maritimus	Ursus maritimus	Phyllostomidae	36.8	412
Vespadelus vulturnus	Vespadelus vulturnus	Phyllostomidae			27.6	649	33.3	649
Aepyprymnus rufescens	Aepyprymnus rufescens	Potoroidae	36.5	514	25	650
Bettongia gaimardi	Bettongia gaimardi	Potoroidae	35.6	514	10	651	20	651
Bettongia penicillata	Bettongia penicillata	Potoroidae	37.2	514
Potorous tridactylus	Potorous tridactylus	Potoroidae	35.9	514	20	652
Heterohyrax brucei	Heterohyrax brucei	Procaviidae	36.7	514	25	653
Procavia capensis	Procavia capensis	procaviidae	39	514	27	654	35	654
Bassaris astutus	Bassariscus astutus	Procyonidae	37.6	412
Bassariscus sumichrasti	Bassariscus sumichrasti	Procyonidae	38.8	514
Nasua narica	Nasua narica	Procyonidae	38.6	514	25	655
Nasua nasua	Nasua nasua	Procyonidae	36.4	514	25	655	33	655
Potos flavus	Potos flavus	Procyonidae	36.1	514	23	543	30	543
Procyon cancrivorus	Procyon cancrivorus	Procyonidae	37.6	514	27	428
Procyon lotor	Procyon lotor	Procyonidae	38	514
Petauroides volans	Petauroides volans	Pseudocheiridae	35.4	514	18	650	25	650
Pseudocheirus peregrinus	Pseudocheirus peregrinus	Pseudocheiridae	37.4	514	25	639	32.5	639
Pseudomys gracilicaudatus	Pseudomys gracilicaudatus	Pseudocheiridae	36.8	514
Pseudomys hermannsburgensis	Pseudomys hermannsburgensis	Pseudocheiridae	37.8	514	31	656
Cynopterus brachyotis	Cynopterus brachyotis	Pteropodidae	36.5	514	30	595	37	595
Dobsonia anderseni	Dobsonia anderseni	Pteropodidae	36.4	514	28	437
Dobsonia minor	Dobsonia minor	Pteropodidae	36.5	514	27.5	657
Dobsonia moluccensis	Dobsonia moluccensis	Pteropodidae	36.8	514	17	437
Dobsonia praedatrix	Dobsonia praedatrix	Pteropodidae	37.1	514	26	437
Eonycteris spelaea	Eonycteris spelaea	Pteropodidae	34	514	26	595
Felis concolor	Puma concolor	Pteropodidae	37.6	514
Macroglossus minimus	Macroglossus minimus	Pteropodidae	36.2	514	30.9	658
Macropus (major) fuliginosus	Macropus fuliginosus	Pteropodidae	37.2	412
Macropus (Wallabia) agilis	Macropus agilis	Pteropodidae	37.9	412
Macropus (Wallabia) dorsalis	Macropus dorsalis	Pteropodidae	37.4	412
Macropus eugenii	Macropus eugenii	Pteropodidae	36.5	514
Melonycteris melanops	Melonycteris melanops	Pteropodidae	34.9	514	28	659
Meriones hurrianae	Meriones hurrianae	Pteropodidae	36.1	514
Meriones tristrami	Meriones tristrami	Pteropodidae	36.5	514
Nyctimene albiventer	Nyctimene albiventer	Pteropodidae	35.9	514	28	437
Nyctimene cyclotis	Nyctimene cyclotis	Pteropodidae	36	514
Nyctimene major	Nyctimene major	Pteropodidae	33	514
Paranyctimene raptor	Paranyctimene raptor	Pteropodidae	33.8	514	27	437
Paraxerus (palliatus) ornatus	Paraxerus palliatus	Pteropodidae	39.3	514
Paraxerus cepapi	Paraxerus cepapi	Pteropodidae	39.1	412
Parotomys brantsii	Parotomys brantsii	Pteropodidae	39.1	514
Pltilocerus lowii	Ptilocercus lowii	Pteropodidae	36.5	514
Pteropus pumilus	Pteropus pumilus	Pteropodidae	36.1	514
Pteropus rodricensis	Pteropus rodricensis	Pteropodidae	36.5	514	24	437
Pteropus scapulatus	Pteropus scapulatus	Pteropodidae	37	514	24	611	35	611
Pteropus vampyrus	Pteropus vampyrus	Pteropodidae	36.9	514
Puma yagouaroundi	Puma yagouaroundi	Pteropodidae	38.4	514	27	582
Rangifer tarandus	Rangifer tarandus	Pteropodidae	39.2	514
Raphicerus campestris	Raphicerus campestris	Pteropodidae	39	514	30	660
Saccopteryx bilineata	Saccopteryx bilineata	Pteropodidae	35.5	514	30	661
Sylvilagus audubonii	Sylvilagus audubonii	Pteropodidae	38.3	514	28	662	40	662
Ceratotherium simum	Ceratotherium simum	Rhinocerotidae	35.2	412
Rhinophylla pumilio	Rhinophylla pumilio	Rhinonycteridae	34.7	514	30	569
Ammospermophilus leucurus	Ammospermophilus leucurus	Sciuridae	37.5	514	31	591	34	591
Cynomys (Citellus) leucurus	Cynomys leucurus	Sciuridae	37.2	412
Cynomys ludovicianus	Cynomys ludovicianus	Sciuridae	36.7	514	30	663	35	663
Funisciurus congicus	Funisciurus congicus	Sciuridae	39.3	514
Glaucomys volans	Glaucomys volans	Sciuridae	39	514
Spermophilus (Citellus) franklinii	Spermophilus franklinii	Sciuridae	36.6	514
Spermophilus beldingi	Spermophilus beldingi	Sciuridae	35.5	514
Spermophilus citellus	Spermophilus citellus	Sciuridae	37.5	514
Spermophilus lateralis	Spermophilus lateralis	Sciuridae	36.3	514	23	664
Spermophilus mohavensis	Spermophilus mohavensis	Sciuridae	37	514
Spermophilus parryi	Spermophilus parryii	Sciuridae	37	514
Spermophilus richardsoni	Spermophilus richardsonii	Sciuridae	35.5	514
Spermophilus spilosoma	Spermophilus spilosoma	Sciuridae	36.1	514
Spermophilus tereticaudus	Spermophilus tereticaudus	Sciuridae	36.3	514
Spermophilus townsendii	Spermophilus townsendii	Sciuridae	35.6	514
Spermophilus tridecemlineatus	Spermophilus tridecemlineatus	Sciuridae	35.7	514
Spermophilus undulatus	Spermophilus undulatus	Sciuridae	38	514
Spilocuscus maculatus	Spilocuscus maculatus	Sciuridae	34.7	514	20.8	665
Tamias minimus	Tamias minimus	Sciuridae	37	514	26	666	34	666
Tamias striatus	Tamias striatus	Sciuridae	38.2	514	28.5	589	32	589
Tamiasciurus hudsonicus	Tamiasciurus hudsonicus	Sciuridae	39.4	514	15	667
Tarsipes rostratus	Tarsipes rostratus	Sciuridae	36.6	514	28	668
Blarina brevicauda	Blarina brevicauda	Soricidae	38.3	514	25	550, 669
Blarina carolinensis	Blarina carolinensis	Soricidae	36.8	514
Crocidura crossei	Crocidura crossei	Soricidae	34.3	514
Crocidura hildegardeae	Crocidura hildegardeae	Soricidae	35.7	514	30	573
Crocidura jouvenetae	Crocidura jouvenetae	Soricidae			31	573
Crocidura luna	Crocidura luna	Soricidae	34.8	514	31	573
Crocidura olivieri	Crocidura olivieri	Soricidae	35.3	514	27.5	573
Crocidura poensis	Crocidura poensis	Soricidae	35.5	514	30	573
Crocidura russula	Crocidura russula	Soricidae	34.7	514	27.5	573	35	573
Crocidura suaveolens	Crocidura suaveolens	Soricidae	35.1	514	27.5	573	35	573
Crocidura viaria	Crocidura viaria	Soricidae	34.5	514	31	573
Cryptotis parva	Cryptotis parva	Soricidae	37	514
Neomys anomalus	Neomys anomalus	Soricidae			25	670
Neomys fodiens	Neomys fodiens	Soricidae	37.3	514	25	670
Neotoma fuscipes	Neotoma fuscipes	Soricidae	36.6	514
Notiosorex crawfordi	Notiosorex crawfordi	Soricidae	37.6	514	32	671
Sorex cinereus	Sorex cinereus	Soricidae	38.4	514	25	672
Sorex coronatus	Sorex coronatus	Soricidae	37.6	514
Sorex minutus	Sorex minutus	Soricidae	38.5	514	24	673
Sorex palustris	Sorex palustris	Soricidae	39.7	412
Sorex vagrans	Sorex vagrans	Soricidae	38	514
Spalacopus cyanus	Spalacopus cyanus	Soricidae	36.5	514	26.5	519, 674
Cannomys badius	Cannomys badius	Spalacidae	36	514	26.74	519	34.5	519
Spermophilus armatus	Spermophilus armatus	Spalacidae	35.7	514
Spermophilus beecheyi	Spermophilus beecheyi	Spalacidae	37.6	514	25	675	30	675
Tadarida brasiliensis	Tadarida brasiliensis	Spalacidae	36	514	26.3	633	32.7	633
Tachyoryctes splendens	Tachyoryctes splendens	Tachyglossidae	35.9	514	27	523
Zalophus californianus	Zalophus californianus	Tachyglossidae			6.4	676
Condylura cristata	Condylura cristata	Talpidae	37.7	514	24.53	677
Neurotrichus gibbsii	Neurotrichus gibbsii	Talpidae	38.4	514	25	677
Sciurus carolinensis	Sciurus carolinensis	Talpidae	38.7	514
Scotinomys teguina	Scotinomys teguina	Talpidae	37.6	514
Scotinomys xerampelinus	Scotinomys xerampelinus	Talpidae	36.2	514
Sekeetamys calurus	Sekeetamys calurus	Talpidae	37.5	514
Setifer setosus	Setifer setosus	Talpidae	32.2	514	28	540
Taurotragus oryx	Taurotragus oryx	Tarsiidae	39.1	514
Taxidea taxus	Taxidea taxus	Tarsiidae	38	514
Tenrec ecaudatus	Tenrec ecaudatus	Tarsiidae	33	514
Thallomys paedulcus	Thallomys paedulcus	Tarsiidae	36.7	514	27.46	678	35.89	678
Tarsius syrichta	Tarsius syrichta	Tarsipedidae	33.8	514	32	679
Dicotyles tajacu	Pecari tajacu	Tayassuidae	37.5	514	28	680	35	680
Geogale aurita	Geogale aurita	Tenrecidae	34.9	514
Setonix brachyurus	Setonix brachyurus	Tenrecidae	36.3	514	20	639	32.5	639
Trichechus manatus	Trichechus manatus	Tragulidae			24	681
Trichosurus caninus	Trichosurus caninus	Trichechidae	37	412
Trichosurus fuliginosus (vulpeca)	Trichosurus vulpecula	Trichechidae	36	514
Tupaia belangeri	Tupaia belangeri	Trichechidae			27.5	682	35	682
Tupaia glis	Tupaia glis	Tupaiidae	37	514	30	585
Tursiops truncatus	Tursiops truncatus	Tupaiidae			5.9	683	23	683
Chalinolobus gouldii	Chalinolobus gouldii	Vespertilionidae	35.5	514	35	684
Eptesicus fuscus	Eptesicus fuscus	Vespertilionidae	36	514	26.7	685	36	685
Histiotus velatus	Histiotus velatus	Vespertilionidae	30.5	514	25	569
Lasiurus cinereus	Lasiurus cinereus	Vespertilionidae			30	686	34	686
Miniopterus schreibersi	Miniopterus schreibersii	Vespertilionidae	37.7	514	32.5	567	37.5	567
Mirounga angustirostris	Mirounga angustirostris	Vespertilionidae	35	412
Myotis keaysi	Myotis keaysi	Vespertilionidae			29.2	687
Myotis lucifugus	Myotis lucifugus	Vespertilionidae	37.2	514	36	688
Myotis myotis	Myotis myotis	Vespertilionidae	35	412
Myotis oxyotus	Myotis oxyotus	Vespertilionidae			25.2	687
Myotis sodalis	Myotis sodalis	Vespertilionidae	30.5	514
Myotis thysanodes	Myotis thysanodes	Vespertilionidae			32.5	689
Myotomys sloggetti	Myotomys sloggetti	Vespertilionidae	38	514
Myotomys unisulcatus	Myotomys unisulcatus	Vespertilionidae	34.8	514
Nyctophilus geoffroyi	Nyctophilus geoffroyi	Vespertilionidae	31.6	514	29.1	690
Nyctophilus gouldi	Nyctophilus gouldi	Vespertilionidae			30.7	690
Ochotona collaris	Ochotona collaris	Vespertilionidae	39	412
Ochotona princeps	Ochotona princeps	Vespertilionidae	40.1	514
Viverra megaspila	Viverra megaspila	Vespertilionidae	38.1	412
Viverricula indica	Viverricula indica	Vespertilionidae	38.9	412
Vulpes cana	Vulpes cana	Vespertilionidae			20	691
Arctictis binturong	Arctictis binturong	Viverridae	36.7	514	27	516
Arctogalidia trivirgata	Arctogalidia trivirgata	Viverridae	36.2	514	19	516
Genetta tigrina	Genetta tigrina	Viverridae			26	692
Paradoxurus hermaphroditus	Paradoxurus hermaphroditus	Viverridae	36.5	514	27	516
Paraechinus aethiopicus	Paraechinus aethiopicus	Viverridae	34.2	514	30	581	34.2	581
Lasiorhinus latifrons	Lasiorhinus latifrons	Vombatidae	35.3	514	25	693	39	693

## Sheet: References
1	J. D. Anderson, G. K. Williamson, Terrestrial mode of reproduction in Ambystoma cingulatum. Herpetologica 32, 214-221 (1976).
2	M. E. Feder, J. F. Lynch, H. B. Shaffer, D. B. Wake, Field body temperatures of tropical and temperature zone salamanders. Smithsonian herpetological information service 52, 1-23 (1982).
3	B. H. Brattstrom, A preliminary review of the thermal requirements of amphibians. Ecology 44, 238-255 (1963).
4	E. L. Thompson, J. E. Gates, G. J. Taylor, Distribution and breeding habitat selection of the Jefferson salamander, Ambystoma jeffersonianum, in Maryland. J. Herpetol. 14, 113-120 (1980).
5	A. J. Gatz, Critical thermal maxima of Ambystoma maculatum (Shaw) and Ambystoma jeffersonianum (Green) in relation to time of breeding. Herpetologica 27, 157-160 (1971).
6	M. B. John, Occurrence of Ambystoma macrodactylum in the warner mountains of northeastern California. Herpetologica 23, 315-316 (1967).
7	J. H. Howard, R. L. Wallace, J. R. Stauffer, Critical thermal maxima in populations of Ambystoma macrodactylum from different elevations. J. Herpetol. 17, 400-402 (1983).
8	F. H. Pough, R. E. Wilson, Natural daily temperature stress, dehydration, and acclimation in Juvenile Ambystoma Maculatum (Shaw) (Amphibia: Caudata). Physiol. Zool. 43, 194-205 (1970).
9	F. Pough, Acid precipitation and embryonic mortality of spotted salamanders, Ambystoma maculatum. Science 192, 68-70 (1976).
10	J. A. Sealander, W. W. Boyce, Critical thermal maxima of some Arkansas salamanders in relation to thermal acclimation. Herpetologica 25, 122-124 (1969).
11	J. D. Anderson, R. E. Graham, Vertical migration and stratification of larval Ambystoma. Copeia 1967, 371-374 (1967).
12	J. D. Anderson, R. D. Worthington, The life history of the Mexican salamander Ambystoma ordinarium Taylor. Herpetologica 27, 165-176 (1971).
13	B. H. Brattstrom, Thermal acclimation in Anuran amphibians as a function of latitude and altitude. Comp. Biochem. Physiol. 24, 93-111 (1968).
14	E. Sherman, Ontogenetic change in thermal tolerance of the toad Bufo woodhousii fowleri. Comparative Biochemistry and Physiology Part A: Physiology 65, 227-230 (1980).
15	B. R. Scheffers, D. P. Edwards, A. Diesmos, S. E. Williams, T. A. Evans, Microhabitats reduce animal's exposure to climate extremes. Global Change Biol 20, 495-503 (2014).
16	R. A. Nussbaum, Nests and eggs of the pacific giant salamander, Dicamptodon ensatus (Eschscholtz). Herpetologica 25, 257-262 (1969).
17	R.-Q. Zheng, C.-T. Liu, Giant spiny-frog (Paa spinosa) from different populations differ in thermal preference but not in thermal tolerance. Aquat. Ecol. 44, 723-729 (2010).
18	K. A. Christian, F. Nunez, L. Clos, L. J. B. Diaz, Thermal relations of some tropical frogs along an altitudinal gradient. Biotropica 20, 236-239 (1988).
19	B. H. Brattstrom, Thermal acclimation in Australian amphibians. Comp. Biochem. Physiol. 35, 69-103 (1970).
20	J. Mahoney, V. J. O. Hutchison, Photoperiod acclimation and 24-hour variations in the critical thermal maxima of a tropical and a temperate frog. Oecologia 2, 143-161 (1969).
21	J. R. Layne Jr, M. A. Romano, Critical thermal minima of Hyla chrysoscelis, H. cinerea, H. gratiosa and natural hybrids (H. cinerea× H. gratiosa). Herpetologica, 216-221 (1985).
22	C. R. Johnson, Diel variation in the thermal tolerance of Litoria gracilenta (Anura: Hylidae). Comp. Biochem. Physiol. A 41, 727-730 (1972).
23	D. MacArthur, J. Dandy, Physiological aspects of overwintering in the boreal chorus frog (Pseudacris triseriata maculata). Comp. Biochem. Physiol. A 72, 137-141 (1982).
24	K. Miller, G. C. Packard, An altitudinal cline in critical thermal maxima of chorus frogs (Pseudacris triseriata). Am. Nat. 111, 267-277 (1977).
25	R. E. J. A. M. N. Gordon, A contribution to the life history and ecology of the plethodontid salamander Aneides aeneus (Cope and Packard). Am. Midl. Nat., 666-701 (1952).
26	R. E. Gordon, R. L. J. C. Smith, Notes on the life history of the salamander Aneides aeneus. Copeia 1949, 173-175 (1949).
27	J. F. Lynch, University of California, Berkeley, Berkeley (1974).
28	R. C. Stebbins, Amphibians of western north America. (Univ of California Press, 1951).
29	R. C. Stebbins, Natural history of the salamanders of the plethodontid genus Ensatina. University of California Publications in Zoology 54, 47-123 (1954).
30	G. M. Rosenthal, The role of moisture and temperature in the local distribution of the plethodontid salamander Aneides lugubris. (University of California, Berkeley, 1954).
31	J. R. Hendrickson, Ecology and systematics of salamanders of the genus Batrachoseps. (University of California Press, 1954).
32	J. D. Cunningham, Aspects of the ecology of the Pacific slender salamander, Batrachoseps pacificus, in southern California. Ecology 41, 88-99 (1960).
33	R. C. Stebbins, J. R. Hendrickson, Field studies of amphibians in Colombia, South America. (University of California Press, 1959).
34	J. L. Vial, The ecology of the tropical salamander, Bolitoglossa subpalmata, in Costa Rica. Rev. Biol. Trop. 15, 13-115 (1968).
35	J. R. Layne Jr, D. L. Claussen, The time courses of CTMax and CTMin acclimation in the salamander Desmognathus fuscus. J. Therm. Biol. 7, 139-141 (1982).
36	R. M. Shealy, Factors influencing activity in the salamanders Desmognathus ochrophaeus and D. monticola (Plethodontidae). Herpetologica, 94-102 (1975).
37	C. M. J. E. Bogert, Relative abundance, habitats, and normal thermal levels of some Virginian salamanders. Ecology 33, 16-30 (1952).
38	L. C. J. E. M. Fitzpatrick, Energy allocation in the Allegheny mountain salamander, Desmognathus ochrophaeus. Ecol. Monogr. 43, 43-58 (1973).
39	R. G. J. E. Zweifel, Studies on the critical thermal maxima of salamanders. Ecology 38, 64-69 (1957).
40	C. R. Mahrdt, The occurrence of Ensatina eschscholtzii eschscholtzii in Baja California, Mexico. J. Herpetol. 9, 240-242 (1975).
41	F. J. J. E. Vernberg, Hibernation studies of two species of salamanders, Plethodon cinereus cinereus and Eurycea bislineata bislineata. Ecology 34, 55-62 (1953).
42	J. R. Layne Jr, D. L. Claussen, Seasonal variation in the thermal acclimation of critical thermal maxima (CTMax) and minima (CTMin) in the salamander Eurycea bislineata. J. Therm. Biol. 7, 29-33 (1982).
43	J. R. Spotila, Role of temperature and water in the ecology of lungless salamanders. Ecol. Monogr. 42, 95-125 (1972).
44	V. H. Hutchison, The distribution and ecology of the cave salamander, Eurycea lucifuga. Ecol. Monogr. 28, 1-20 (1958).
45	C. S. Berkhouse, J. N. Fries, Critical thermal maxima of juvenile and adult San Marcos salamanders (Eurycea nana). The Southwestern Naturalist 40, 430-434 (1995).
46	J. N. Dent, J. S. Kirby-Smith, Metamorphic physiology and morphology of the cave salamander Gyrinophilus palleucus. Copeia, 119-130 (1963).
47	R. B. Bury, G. M. Fellers, S. B. Ruth, First records of Plethodon dunni in California, and new distributional data on Ascaphus truei, Rhyacotriton olympicus, and Hydromantes shastae. J. Herpetol. 3, 157-161 (1969).
48	F. B. Taub, The distribution of the red‐backed salamander, Plethodon c. cinereus, within the soil. Ecology 42, 681-698 (1961).
49	F. H. Test, B. A. Bingham, Census of a population of the red-backed salamander (Plethodon cinereus). Am. Midl. Nat., 362-372 (1948).
50	J. R. L. Elwood, PhD Thesis, Drexel University, Philadelphia, Pennsylvania, (2003).
51	D. P. Reagan, Ecology and distribution of the Jemez mountains salamander, Plethodon neomexicanus. Copeia, 486-492 (1972).
52	L. W. Swan, Some environmental conditions influencing life at high altitudes. Ecology 33, 109-111 (1952).
53	M. MANIS, Miami University, (1986).
54	N. Holzman, J. J. McManus, Effects of acclimation on metabolic rate and thermal tolerance in the carpenter frog, Rana vergatipes. Comparative Biochemistry and Physiology Part A: Physiology 45, 833-842 (1973).
55	R. A. Nussbaum, A nest site of the Olympic salamander, Rhyacotriton olympicus (Gaige). Herpetologica 25, 277-278 (1969).
56	F. H. Pough, Natural daily temperature acclimation of eastern red efts, Notophthalmus v. viridescens (Rafinesque) (Amphibia: Caudata). Comparative Biochemistry Physiology A 47, 71-78 (1974).
57	S. D. Busack, Body temperatures and live weights of five Spanish amphibians and reptiles. J. Herpetol. 12, 256-258 (1978).
58	M. Coates, E. Benedict, C. L. Stephens, An unusual aggregation of the newt Taricha granulosa granulosa. Copeia 1970, 176-178 (1970).
59	B. H. Brattstrom, J. W. Warren, On the validity of Taricha torosa klauberi Wolterstorff. Herpetologica 9, 180-182 (1953).
60	W. N. McFarland, Upper lethal temperatures in the salamander Taricha torosa as a function of acclimation. Copeia 1955, 191-194 (1955).
61	G. Ultsch, Effects of water hyacinths (Eichhornia crassipes) on the microenvironment of aquatic communities. Archiv fur Hydrobiologie, (1973).
62	F. C. James, W. P. Porter, Behavior-microclimate relationships in the African rainbow lizard, Agama agama. Copeia, 585-593 (1979).
63	R. G. Bowker, Precision of thermoregulation of some African lizards. Physiol. Zool. 57, 401-412 (1984).
64	C. E. Ortega, D. S. Stranc, M. P. Casal, G. M. Halman, A. E. Muchlinski, A positive fever response in Agama agama and Sceloporus orcutti (Reptilia: Agamidae and Iguanidae). J. Comp. Physiol. B 161, 377-381 (1991).
65	R. B. Huey, E. R. Pianka, Seasonal variation in thermoregulatory behavior and body temperature of diurnal Kalahari lizards. Ecology 58, 1066-1075 (1977).
66	B. H. Brattstrom, Body temperatures of reptiles. The American Midland Naturalist 73, 376-422 (1965).
67	P. Light, W. R. Dawson, V. H. Shoemaker, A. R. Main, Observations on the thermal relations of western Australian lizards. Copeia 1966, 97-110 (1966).
68	H. Heatwole, B. T. Firth, Voluntary maximum temperature of the jackie lizard, Amphibolurus muricatus. Copeia, 824-829 (1982).
69	I. F. Spellerberg, Temperature tolerances of southeast Australian reptiles examined in relation to reptile thermoregulatory behaviour and distribution. Oecologia 9, 23-46 (1972).
70	H. Heatwole, Thermal ecology of the desert dragon Amphibolurus inermis. Ecol. Monogr. 40, 425-457 (1970).
71	P. Licht, W. R. Dawson, V. H. Shoemaker, Heat resistance of some Australian lizards. Copeia 1966, 162-169 (1966).
72	B. A. Shanbhag, Reproductive strategies in the lizard, Calotes versicolor Curr. Sci. 84, 646-652 (2003).
73	K. A. Christian, G. S. Bedford, Seasonal changes in thermoregulation by the frillneck lizard, Chlamydosaurus kingii, in tropical Australia. Ecology 76, 124-132 (1995).
74	M. Warburg, Studies on the environmental physiology of some Australian lizards from arid and semi-arid habitats. Aust. J. Zool. 13, 563-576 (1965).
75	H. Cogger, Thermal relations of the malle fragon Amphibolurus fordi (Lacertilia: Agamidae). Aust. J. Zool. 22, 319-339 (1974).
76	E. R. Pianka, Ecology of the agamid lizard Amphibolurus isolepis in Western Australia. Copeia, 527-536 (1971).
77	F. Mitchell, Studies on the ecology of the agamid lizard Amphibolurus maculosus (Mitchell). Trans. R. Soc. S. Aust. 97, 47-76 (1973).
78	A. Mori, T. Hikida, Natural history observation of the flying lizard, Draco volans sumatranus from Sarawak, Malaysia. The Raffles Bulletin of Zoology 41, 83-94 (1993).
79	C. Rummery, R. Shine, D. L. Houston, M. B. Thompson, Thermal biology of the Australian forest dragon, Hypsilurus spinipes (Agamidae). Copeia 1995, 818-827 (1995).
80	P. E. Hertz, R. B. Huey, E. Nevo, Homage to Santa Anita: thermal sensitivity of sprint speed in agamid lizards. Evolution 37, 1075-1084 (1983).
81	E. R. Pianka, H. D. Pianka, The ecology of Moloch horridus (Lacertilia: Agamidae) in western Australia. Copeia, 90-103 (1970).
82	N. Clemann, Microhabitat occupation and functional morphology of four species of sympatric agamid lizards in the Kyzylkum Desert, central Uzbekistán. Anim. Biodivers. Conserv. 31.2, 51-62 (2008).
83	C. S. Schäuble, G. C. Grigg, Thermal ecology of the Australian agamid Pogona barbata. Oecologia 114, 461-470 (1998).
84	T. A. Zari, Effects of body mass and temperature on standard metabolic rate of the herbivorous desert lizard Uromastyx philbyi. J. Arid Environ. 33, 457-461 (1996).
85	A. S. Abe, Experimental and field record of preferred temperature in the neotropical amphisbaenid Amphisbaena mertensi Stauch (Reptilia, Amphisbaenidae). Comparative Biochemistry Physiology A, 251-253 (1984).
86	P. López, A. Salvador, J. Martín, Soil temperature, rock selection, and the thermal ecology of the amphisbaenian reptile Blanus cinereus. Can. J. Zool. 76, 673-679 (1998).
87	P. T. Gregory, Physical factor selectivity in the fossorial lizard Anguis fragilis. J. Herpetol. 14, 95-99 (1980).
88	R. Meek, Null models and the thermal biology of the anguid lizard Anguis fragilis; evidence for thermoregulation? Amphib-Reptilia 26, 445-450 (2005).
89	L. J. Vitt, Body temperatures of high latitude reptiles. Copeia 1974, 255-256 (1974).
90	J. Stewart, Thermal biology of the live bearing lizard Gerrhonotus coeruleus. Herpetologica, 349-355 (1984).
91	J. D. Cunningham, Thermal relations of the alligator lizard Gerrhonotus multicarinatus webbi. Herpetologica 22, 1-7 (1966).
92	B. A. Kingsbury, Thermal constraints and eurythermy in the lizard Elgaria multicarinata. Herpetologica, 266-273 (1994).
93	R. B. Bury, T. G. Balgooyen, Temperature selectivity in the legless lizard, Anniella pulchra. Copeia, 152-155 (1976).
94	E. R. Pianka, H. D. Pianka, Comparative ecology of twelve species of nocturnal lizards (Gekkonidae) in the Western Australian desert. Copeia, 125-142 (1976).
95	M. J. Angilletta, Y. L. Werner, Australian geckos do not display diel variation in thermoregulatory behavior. Copeia 1998, 736-742 (1998).
96	R. M. Andrews, Lizards in the slow lane: Thermal biology of chameleons. J. Therm. Biol. 33, 57-61 (2008).
97	B. R. Burrage, Comparative ecology and behavior of Chamaeleo pumilus pumilus (Gmelin) and C. namaquensis A. Smith (Sauria: Chamaeleonidae). Annals of the South African Museum. Annale van die Suid-Afrikaanse Museum. 61, 1-158 (1973).
98	M. Dimaki, E. D. Valakos, A. Legakis, Variation in body temperatures of the African Chameleon Chamaeleo africanus Laurenti, 1768 and the Common Chameleon Chamaeleo chamaeleon (Linnaeus, 1758). Belg. J. Zool. 130, 87-91 (2000).
99	A. F. Bennett, paper presented at the Proceedings of the third international conference of comparative physiology and biochemistry, 2004.
100	T. A. Zari, Effects of body mass and temperature on standard metabolic rate of the desert chameleon Chamaeleo calyptratus. J. Arid Environ. 24, 75-80 (1993).
101	A. M. Al-Johany, Thermal selection of Chamaeleo chamaeleon from south-western Arabia. Journal of the College of Science of King Saud University 8, 49-57 (1996).
102	G. W. Ferguson et al., Do panther chameleons bask to regulate endogenous vitamin D3 production? Physiological Biochemical Zoology 76, 52-59 (2003).
103	P. Doughty, Critical thermal minima of garter snakes (Thamnophis) depend on species and body size. Copeia 1994, 537-540 (1994).
104	G. R. Stewart, Thermal ecology of the garter snakes Thamnophis sirtalis concinnus (Hallowell) and Thamnophis ordinoides (Baird and Girard). Herpetologica 21, 81-102 (1965).
105	H. Laburn, D. Mitchell, E. Kenedi, G. Louw, Pyrogens fail to produce fever in a cordylid lizard. American Journal of Physiology-Regulatory, Integrative Comparative Physiology 241, R198-R202 (1981).
106	S. Clusella Trullas, J. S. Terblanche, J. H. van Wyk, J. R. Spotila, Low repeatability of preferred body temperature in four species of cordylid lizards: Temporal variation and implications for adaptive significance. Evol. Ecol. 21, 63-79 (2007).
107	S. Clusella-Trullas, J. H. Wyk, J. R. Spotila, Thermal benefits of melanism in cordylid lizards: a theoretical and field test. Ecology 90, 2297-2312 (2009).
108	D. Bauwens, A. M. Castilla, P. l. F. N. Mouton, Field body temperatures, activity levels and opportunities for thermoregulation in an extreme microhabitat specialist, the girdled lizard (Cordylus macropholis). J. Zool. 249, 11-18 (1999).
109	S. Lailvaux, G. Alexander, M. Whiting, Sex-based differences and similarities in locomotor performance, thermal preferences, and escape behaviour in the lizard Platysaurus intermedius wilhelmi. Physiological and Biochemical Zoology: Ecological and Evolutionary Approaches 76, 511-521 (2003).
110	S. McConnachie, (2006).
111	S. McConnachie, G. Alexander, M. Whiting, Lower temperature tolerance in the temperate, ambush foraging lizard Pseudocordylus melanotus melanotus. J. Therm. Biol. 32, 66-71 (2007).
112	H. F. Hirth, Temperature preferences of five species of neotropical lizards. Herpetologica 20, 273-276 (1965).
113	H. F. Hirth, The ecology of two lizards on a tropical beach. Ecol. Monogr. 33, 83-112 (1963).
114	B. T. Firth, C. L. Ralph, T. J. Boardman, Independent effects of the pineal and a bacterial pyrogen in behavioural thermoregulation in lizards. Nature 285, 399 (1980).
115	E. M. Uzee, (1990).
116	A. L. Angert, D. Hutchison, D. Glossip, J. B. Losos, Microhabitat use and thermal biology of the collared lizard (Crotaphytus collaris collaris) and the fence lizard (Sceloporus undulatus hyacinthinus) in Missouri glades. J. Herpetol., 23-29 (2002).
117	L. C. Cole, Experiments on toleration of high temperature in lizards with reference to adaptive coloration. Ecology 24, 94-108 (1943).
118	R. B. Cowles, C. M. Bogert, A preliminary study of the thermal requirements of desert reptiles. Bull. Am. Mus. Nat. Hist. 83, 53 (1944).
119	W. S. Parker, E. R. Pianka, Ecological observations on the leopard lizard (Crotaphytus wislizeni) in different parts of its range. Herpetologica 32, 95-114 (1976).
120	S. R. Crowley, R. D. Pietruszka, Aggressiveness and vocalization in the leopard lizard (Gambelia wislizennii): The influence of temperature. Anim. Behav. 31, 1055-1060 (1983).
121	F. H. van Berkum, Latitudinal patterns of the thermal sensitivity of sprint speed in lizards. Am. Nat. 132, 327-343 (1988).
122	Y. Werner, A. Whitaker, Observations and comments on the body temperatures of some New Zealand reptiles. N. Z. J. Zool. 5, 375-393 (1978).
123	J. Rock, R. M. Andrews, A. Cree, Effects of Reproductive Condition, Season, and Site on Selected Temperatures of a Viviparous Gecko. Physiol. Biochem. Zool. 73, 344-355 (2000).
124	J. M. Sunday et al., Thermal-safety margins and the necessity of thermoregulatory behavior across latitude and elevation. Proceedings of the National Academy of Sciences of the USA 111, 5610-5615 (2014).
125	G. J. Alexander, R. Brooks, Circannual rhythms of appetite and ecdysis in the elapid snake, Hemachatus haemachatus, appear to be endogenous. Copeia 1999, 146-152 (1999).
126	H. B. Lillywhite, Behavioral thermoregulation in Australian elapid snakes. Copeia 1980, 452-458 (1980).
127	B. E. Dial, The thermal ecology of two sympatric, nocturnal Coleonyx (Lacertilia: Gekkonidae). Herpetologica, 194-201 (1978).
128	B. E. Dial, L. L. Grismer, A phylogenetic analysis of physiological-ecological character evolution in the lizard genus Coleonyx and its implications for historical biogeographic reconstruction. Syst. Biol. 41, 178-195 (1992).
129	R. B. Huey, P. H. Niewiarowski, J. Kaufmann, J. C. Herron, Thermal biology of nocturnal ectotherms: is sprint performance of geckos maximal at low body temperatures? Physiol. Zool. 62, 488-504 (1989).
130	J. D. Cunningham, Additional observations on the body temperatures of reptiles. Herpetologica 22, 184-189 (1966).
131	Y. Werner, H. Takahashi, Y. Yasukawa, H. Ota, Factors affecting foraging behaviour, as seen in a nocturnal ground lizard, Goniurosaurus kuroiwae kuroiwae. J. Nat. Hist. 40, 439-459 (2006).
132	R. C. Stebbins, Body temperature studies in South African lizards. Koedoe 4, 54-67 (1961).
133	M. K. Seely, Namib ecology: 25 years of Namib research. (Transvaal Museum Pretoria, South Africa, 1990), vol. 7.
134	M. Kearney, M. Predavec, Do nocturnal ectotherms thermoregulate? A study of the temperate gecko Christinus marmoratus. Ecology 81, 2984-2996 (2000).
135	E. D. Valakos, Thermal ecology of Cyrtodactylus kotschyi (Steindachner, 1870)(Sauria-Gekkonidae) in the insular ecosystems of the Aegean. The Herpetological Journal 1, 396-399 (1989).
136	D. L. Marcellini, Some aspects of the thermal ecology of the gecko Hemidactylus frenatus. Herpetologica 32, 341-345 (1976).
137	C. F. D. Rocha, G. F. Dutra, D. Vrcibradic, V. A. Memezes, The terrestrial reptile fauna of the Abrolhos Archipelago: species list and ecological aspects. Braz. J. Biol. 62, 285-291 (2002).
138	D. T. Bolger, T. J. Case, Divergent ecology of sympatric clones of the asexual gecko, Lepidodactylus lugubris. Oecologia 100, 397-405 (1994).
139	L. J. Vitt, The ecology of tropical lizards in the caatinga of northeast Brazil. (Oklahoma Museum of Natural History, 1995).
140	I. Ikeuchi, M. Hasegawa, A. Mori, Natural history of Phelsuma madagascariensis kochi from a dry forest in Madagascar. Amphib-Reptilia 26, 475-483 (2005).
141	R. B. Huey et al., Why tropical forest lizards are vulnerable to climate warming. Proceedings of the Royal Society B: Biological Sciences 276, 1939-1948 (2009).
142	H. J. Alvarez-Perez, Universidad de Puerto Rico, (1992).
143	G. M. Hallman, C. E. Ortega, M. C. Towner, A. E. Muchlinski, Effect of bacterial pyrogen on three lizard species. Comparative biochemistry physiology A 96, 383-386 (1990).
144	L. J. Vitt, T. C. S. Ávila-Pires, M. C. Espósito, S. S. Sartorius, P. A. Zani, Ecology of Alopoglossus angulatus and A. atriventris (Squamata, Gymnophthalmidae) in western Amazonia. J. Herpetol. 6, 11-21 (2007).
145	L. J. Vitt, S. S. Sartorius, T. C. S. Avila-Pires, M. C. Espósito, Use of time, space, and food by the gymnophthalmid lizard Prionodactylus eigenmanni from the western Amazon of Brazil. Can. J. Zool. 76, 1681-1688 (1998).
146	D. O. Mesquita, G. R. Colli, F. G. França, L. J. Vitt, Ecology of a Cerrado lizard assemblage in the Jalapão region of Brazil. Copeia 2006, 460-471 (2006).
147	H. S. Fitch, Temperature and behavior of some equatorial lizards. Herpetologica 24, 35-38 (1968).
148	L. J. Vitt, P. A. Zani, T. C. Avila-Pires, M. C. Espósito, Geographical ecology of the gymnophthalmid lizard Neusticurus ecpleopus in the Amazon rain forest. Can. J. Zool. 76, 1671-1680 (1998).
149	L. J. Vitt, C. S. A.-P. Teresa, Ecology of two sympatric species of Neusticurus (Sauria: Gymnophthalmidae) in the western Amazon of Brazil. Copeia 1998, 570-582 (1998).
150	D. D. Beck, C. H. Lowe, Ecology of the beaded lizard, Heloderma horridum, in a tropical dry forest in Jalisco, Mexico. J. Herpetol., 395-406 (1991).
151	D. D. Beck, Ecology and behavior of the Gila monster in southwestern Utah. J. Herpetol., 54-68 (1990).
152	G. A. Bartholomew, A field study of temperature relations in the Galapagos marine Iguana. Copeia, 241-250 (1966).
153	H. Heatwole, T.-H. Lin, E. Villalón, A. Muñiz, A. Matta, Some aspects of the thermal ecology of Puerto Rican anoline lizards. J. Herpetol. 3, 65-77 (1969).
154	P. E. Hertz, Sensitivity to high temperatures in three west Indian grass anoles (Sauria, Iguanidae), with a review of heat sensitivity in the genus Anolis. Comparative Biochemistry Physiology A 63, 217-222 (1979).
155	P. E. Hertz, R. B. Huey, Compensation for altitudinal changes in the thermal environment by some Anolis lizards on Hispaniola. Ecology 62, 515-521 (1981).
156	P. E. Hertz, Comparative physiological ecology of the sibling species Anolis cybotes and A. marcanoi. J. Herpetol. 14, 92-95 (1980).
157	P. E. Hertz, Adaptation to altitude in two west Indian anoles (Reptilia: Iguanidae): field thermal biology and physiological ecology. J. Zool. 195, 25-37 (1981).
158	K. Christian, C. R. Tracy, W. P. Porter, Seasonal shifts in body temperature and use of microhabitats by Galapagos land iguanas (Conolophus pallidus). Ecology 64, 463-468 (1983).
159	H. L. Snell, K. A. Christian, Energetics of Galápagos land iguanas: a comparison of two island populations. Herpetologica, 437-442 (1985).
160	K. A. Christian et al., Thermoregulation and energetics of a population of Cuban iguanas (Cyclura nubila) on Isla Magueyes, Puerto Rico. Copeia, 65-69 (1986).
161	L. K. Vaughn, H. A. Bernheim, M. J. Kluger, Fever in the lizard Dipsosaurus dorsalis. Nature 252, 473 (1974).
162	E. R. Pianka, W. S. Parker, Ecology of homed lizards: a review with special reference to Phrynosoma platyrhinos. Copeia 1975, 141-162 (1975).
163	E. T. Simandle, R. E. Espinoza, K. E. Nussear, C. R. Tracy, Lizards, lipids, and dietary links to animal function. Physiological Biochemical Zoology 74, 625-640 (2001).
164	S. M. McGinnis, C. W. Brown, Thermal behavior of the green iguana, Iguana iguana. Herpetologica 22, 189-199 (1966).
165	M. J. Kluger, The evolution and adaptive value of fever: Long regarded as a harmful by-product of infection, fever may instead be an ancient ally against disease, enhancing resistance and increasing chances of survival. Am. Sci. 66, 38-43 (1978).
166	A. Labra, J. Pienaar, T. F. Hansen, Evolution of thermal physiology in Liolaemus lizards: adaptation, phylogenetic inertia, and niche tracking. Am. Nat. 174, 204-220 (2009).
167	F. Cruz, L. Fitzgerald, R. Espinoza, J. Schulte Ii, The importance of phylogenetic scale in tests of Bergmann's and Rapoport's rules: lessons from a clade of South American lizards. J. Evol. Biol. 18, 1559-1574 (2005).
168	A. Muchlinski, A. Estany, M. Don, in FASEB J. (FEDERATION AMER SOC EXP BIOL 9650 ROCKVILLE PIKE, BETHESDA, MD 20814-3998, 1994), vol. 8, pp. A67-A67.
169	I. Duvdevani, A. Borut, Mean body temperature and heat absorption in four species of Acanthodactylus Lizards (Lacertidae). Herpetologica 30, 176-181 (1974).
170	A. D. Mahmoud, Variation in thermal relations between two populations of the sand Lizard, Acanthodactylus boskianus living in thermally divergent habitats of the same altitude. Pakistan Journal of Biological Sciences 6, 1830-1836 (2003).
171	E. Seva Román, Reparto de recursos en dos especies psammófilas de saurios: Acanthodactylus erythrurus y Psammodromus algirus. Arenal costero de Alicante. (Universidad de Alicante. Departamento de Biología, 1984).
172	D. Bauwens, T. Garland Jr, A. M. Castilla, R. Van Damme, Evolution of sprint speed in lacertid lizards: morphological, physiological, and behavioral covariation. Evolution 49, 848-863 (1995).
173	D. Bauwens, A. M. Castilla, R. Van Damme, R. F. Verheyen, Field body temperatures and thermoregulatory behavior of the high altitude lizard, Lacerta bedriagae. J. Herpetol. 24, 88-91 (1990).
174	H. Scheers, R. Van Damme, Micro-scale differences in thermal habitat quality and a possible case of evolutionary flexibility in the thermal physiology of lacertid lizards. Oecologia 132, 323-331 (2002).
175	H. Li, Y.-F. Qu, R.-B. Hu, X. Ji, Evolution of viviparity in cold-climate lizards: testing the maternal manipulation hypothesis. Evol. Ecol. 23, 777-790 (2009).
176	J. A. Díaz, Field thermoregulatory behavior in the western Canarian lizard Gallotia galloti. J. Herpetol., 325-333 (1994).
177	I. F. Spellerberg, Conservation and management of Britain's reptiles based on their ecological and behavioural requirements: a progress report. Biol. Conserv. 7, 289-300 (1975).
178	P. Rismiller, G. Heldmaier, How photoperiod influences body temperature selection in Lacerta viridis. Oecologia 75, 125-131 (1988).
179	D. Bauwens, P. E. Hertz, A. M. Castilla, Thermoregulation in a lacertid lizard: the relative contributions of distinct behavioral mechanisms. Ecology 77, 1818-1830 (1996).
180	A. M. Castilla, D. Bauwens, Thermal biology, microhabitat selection, and conservation of the insular lizard Podarcis hispanica atrata. Oecologia 85, 366-374 (1991).
181	F. J. Diego-Rasilla, V. J. F. Z.-P.-. Perez-Mellado, Home range and habitat selection by Podarcis hispanica (Squamata, Lacertidae) in Western Spain. Folia Zoology 52, 87-98 (2003).
182	C. Adamopoulou, E. D. Valakos, Thermal ecology and activity cycle of Podarcis milensis in a sandy coastal area. Isr. J. Zool. 51, 39-52 (2005).
183	R. Avery, Activity patterns, thermoregulation and food consumption in two sympatric lizard species (Podarcis muralis and P. sicula) from central Italy. J. Anim. Ecol., (1978).
184	F. Braña, Shifts in body temperature and escape behaviour of female Podarcis muralis during pregnancy. Oikos, 216-222 (1993).
185	R. B. Huey et al., Predicting organismal vulnerability to climate warming: roles of behaviour, physiology and adaptation. Philosophical Transactions of the Royal Society B 367, 1665-1679 (2012).
186	R. Van Damme, D. Bauwens, A. M. Castilla, R. F. Verheyen, Altitudinal variation of the thermal biology and running performance in the lizard Podarcis tiliguerta. Oecologia 80, 516-524 (1989).
187	L. M. Carrascal, J. A. Díaz, Thermal ecology and spatio-temporal distribution of the Mediterranean lizard Psammodromus algirus. Holarct. Ecol. 12, 137-143 (1989).
188	S.-P. Huang, M.-C. Tu, Cold tolerance and altitudinal distribution of Takydromus lizards in Taiwan. Zool. Stud. 47, 438-444 (2008).
189	S.-P. Huang, M.-C. Tu, Heat tolerance and altitudinal distribution of a mountainous lizard, Takydromus hsuehshanensis, in Taiwan. J. Therm. Biol. 33, 48-56 (2008).
190	J. Yang, Y.-Y. Sun, H. An, X. Ji, Northern grass lizards (Takydromus septentrionalis) from different populations do not differ in thermal preference and thermal tolerance when acclimated under identical thermal conditions. J. Comp. Physiol. B 178, 343-349 (2008).
191	X. Ji, W. Du, P. Sun, Body temperature, thermal tolerance and influence of temperature on sprint speed and food assimilation in adult grass lizards, Takydromus septentrionalis. J. Therm. Biol. 21, 155-161 (1996).
192	Y.-P. Zhang, X. Ji, The thermal dependence of food assimilation and locomotor performance in southern grass lizards, Takydromus sexlineatus (Lacertidae). J. Therm. Biol. 29, 45-53 (2004).
193	M. Crisp, L. Cook, F. Hereward, Color and heat balance in the lizard Lacerta dugesii. Copeia, 250-257 (1979).
194	L. Gvoždík, To heat or to save time? Thermoregulation in the lizard Zootoca vivipara (Squamata: Lacertidae) in different thermal environments along an altitudinal gradient. Can. J. Zool. 80, 479-492 (2002).
195	J. Patterson, Preferred body temperature: seasonal and sexual differences in the lizard Lacerta vivipara. J. Therm. Biol. 3, 39-41 (1978).
196	B. Heulin, Temperature diurne d'activité des males et des femelles de Lacerta vivipara. Amphib-Reptilia 8, 393-400 (1987).
197	R. Van Damme, D. Bauwens, R. F. Verheyen, Evolutionary rigidity of thermal physiology: the case of the cool temperate lizard Lacerta vivipara. Oikos, 61-67 (1990).
198	L. Gvoždík, A. M. Castilla, A comparative study of preferred body temperatures and critical thermal tolerance limits among populations of Zootoca vivipara (Squamata: Lacertidae) along an altitudinal gradient. J. Herpetol. 35, 486-492 (2001).
199	H. Li, Z. Wang, W. Mei, X. Ji, Temperature acclimation affects thermal preference and tolerance in three Eremias lizards (Lacertidae). Curr Zool 55, 258-265 (2009).
200	L. Luo, Y. Qu, X. Ji, Thermal dependence of food assimilation and sprint speed in a lacertid lizard (Eremias argus) from northern China. Acta Zool. Sin. 52, 256-262 (2006).
201	X.-F. Xu, X. Ji, Ontogenetic shifts in thermal tolerance, selected body temperature and thermal dependence of food assimilation and locomotor performance in a lacertid lizard, Eremias brenchleyi. Comparative Biochemistry Physiology A 143, 118-124 (2006).
202	X. F. Xu, X. J. Chen, X. Ji, Selected body temperature, thermal tolerance and influence of temperature on food assimilation and locomotor performance in lacertid lizard, Eremias brenchleyi. Zool. Res. 22, 443-448 (2001).
203	E. R. Pianka, D. R. King, Varanoid lizards of the world. (Indiana University Press, 2004).
204	D. L. Marcellini, T. A. Jenssen, Thermal ecology of the tropical iguanid lizard, Leiocephalus schreibersi. Am. Midl. Nat., 44-50 (1989).
205	R. E. Espinoza, J. J. Wiens, C. R. Tracy, Recurrent evolution of herbivory in small, cold-climate lizards: Breaking the ecophysiological rules of reptilian herbivory. Proceedings of the National Academy of Sciences 101, 16819-16824 (2004).
206	A. Labra, Selected body temperatures of seven species. Rev. Chil. Hist. Nat. 71, 349-358 (1998).
207	E. Rodríguez-Serrano, C. A. Navas, F. Bozinovic, The comparative field body temperature among Liolaemus lizards: testing the static and the labile hypotheses. J. Therm. Biol. 34, 306-309 (2009).
208	M. Medina, J. Gutierrez, A. Scolaro, N. Ibargüengoytía, Thermal responses to environmental constraints in two populations of the oviparous lizard Liolaemus bibronii in Patagonia, Argentina. J. Therm. Biol. 34, 32-40 (2009).
209	J. H. Carothers, S. F. Fox, P. A. Marquet, F. M. Jaksic, Thermal characteristics of ten Andean lizards of the genus Liolaemus in central Chile. Rev. Chil. Hist. Nat. 70, 297-309 (1997).
210	A. Labra, M. Soto-Gamboa, F. Bozinovic, Behavioral and physiological thermoregulation of Atacama desert-dwelling Liolaemus lizards. Ecoscience 8, 413-420 (2001).
211	E. R. Fuentes, F. M. Jaksic, Activity temperatures of eight Liolaemus (Iguanidae) species in central Chile. Copeia 1979, 546-548 (1979).
212	A. Labra, F. Bozinovic, Interplay between pregnancy and physiological thermoregulation in Liolaemus lizards. Ecoscience 9, 421-426 (2002).
213	C. A. Escobar, A. Labra, H. M. Niemeyer, Chemical composition of precloacal secretions of Liolaemus lizards. J. Chem. Ecol. 27, 1677-1690 (2001).
214	S. Halloy, Notes éco-éthologiques sur Liolaemus huorcohuo sicus Laurent (Iguanidae) du Nord-Ouest argentin. Revue francaise d'Aquariologie 14, 4-15 (1988).
215	F. M. Jaksić, K. Schwenk, Natural history observations on Liolaemus magellanicus, the southernmost lizard in the world. Herpetologica, 457-461 (1983).
216	C. d. S. Bujes, L. Verrastro, Thermal biology of Liolaemus occipitalis (Squamata, Tropiduridae) in the coastal sand dunes of Rio Grande do Sul, Brazil. Braz. J. Biol. 66, 945-954 (2006).
217	M. Cánovas, J. Acosta, H. Villavicencio, J. Marinero, Liolaemus olongasta (NCN). Body Temperature. Herpetol. Rev. 37, (2006).
218	P. Marquet, J. Ortiz, F. Bozinovié, F. Jaksié, Ecological aspects of thermoregulation at high altitudes: the case of Andean Liolaemus lizards in northern Chile. Oecologia 81, 16-20 (1989).
219	N. Ibarguengoytia, V. E. Cussac, Body temperatures of two viviparous Liolaemus lizard species, in Patagonian rain forest and steppe. Herpetol. J. 12, 131-134 (2002).
220	H. Villavicencio, J. Acosta, M. Cánovas, J. Marinero, Thermal ecology of a population of the lizard, Liolaemus pseudoanomalus in western Argentina. Amphib-Reptilia 28, 163 (2007).
221	H. J. Randriamahazo, A. Mori, Thermal biology of an iguanian lizard, Oplurus cuvieri cuvieri, in a tropical dry forest of Madagascar. Amphib-Reptilia 23, 53-62 (2004).
222	J. A. R. R. Herilala, A. Mori, Egg-laying activities and reproductive traits in females of Oplurus cuvieri cuvieri. J. Herpetol. 35, 209-217 (2001).
223	S. J. Bulova, Ecological correlates of population and individual variation in antipredator behavior of two species of desert lizards. Copeia, 980-992 (1994).
224	W. H. Karasov, R. A. Anderson, Correlates of average daily metabolism of field-active zebra-tailed lizards (Callisaurus draconoides). Physiol. Zool. 71, 93-105 (1998).
225	G. C. Packard, M. J. Packard, Eccritic temperatures of zebra-tailed lizards on the Mojave Desert. Herpetologica 26, 168-172 (1970).
226	E. R. Pianka, W. S. Parker, Ecology of the iguanid lizard Callisaurus draconoides. Copeia 1972, 493-508 (1972).
227	A. Muth, Body temperatures and associated postures of the zebra-tailed lizard, Callisaurus draconoides. Copeia, 122-125 (1977).
228	F. Bashey, A. E. Dunham, Elevational variation in the thermal constraints on and microhabitat preferences of the greater earless lizard Cophosaurus texanus. Copeia 1997, 725-737 (1997).
229	S. M. Jones, R. E. Ballinger, Comparative life histories of Holbrookia maculata and Sceloporus undulatus in western Nebraska. Ecology 68, 1828-1838 (1987).
230	S. B. Hager, Microhabitat use and activity patterns of Holbrookia maculata and Sceloporus undulatus at White Sands National Monument, New Mexico. J. Herpetol. 35, 326-330 (2001).
231	F. W. Judd, Activity and thermal ecology of the keeled earless lizard, Holbrookia propinqua. Herpetologica 31, 137-150 (1975).
232	D. E. Murrish, V. J. Vance, Physiological responses to temperature acclimation in the lizard Uta mearnsi. Comp. Biochem. Physiol. 27, 329-337 (1968).
233	M. Soulé, Aspects of thermoregulation in nine species of lizards from Baja California. Copeia 1963, 107-115 (1963).
234	A. A. Prieto Jr, W. G. Whitford, Physiological responses to temperature in the horned lizards, Phrynosoma cornutum and Phrynosoma douglassii. Copeia, 498-504 (1971).
235	K. A. Christian, Thermoregulation by the short-horned lizard (Phrynosoma douglassi) at high elevation. J. Therm. Biol. 23, 395-399 (1998).
236	G. L. Powell, A. P. Russell, Field thermal ecology of the eastern short-horned lizard (Phrynosoma douglassi brevirostre) in southern Alberta. Can. J. Zool. 63, 228-238 (1985).
237	R. M. Andrews, R. M. d. l. C. Fausto, C. Maricela Villagrán Santa, Body temperatures of female Sceloporus grammicus: thermal stress or impaired mobility? Copeia 1997, 108-115 (1997).
238	J. Lemos-Espinal, G. Smith, R. Ballinger, Body temperature and sexual dimorphism of Sceloporus aeneus and Sceloporus palaciosi from Mexico. Amphib-Reptilia 23, 114-119 (2002).
239	R. M. Andrews, Geographic variation in field body temperature of Sceloporus lizards. J. Therm. Biol. 23, 329-334 (1998).
240	C. M. Bogert, Thermoregulation in reptiles, a factor in evolution. Ecology 3, 195-211 (1949).
241	L. D. Garrick, Reproductive influences on behavioral thermoregulation in the lizard, Sceloporus cyanogenys. Physiology Behavior 12, 85-91 (1974).
242	J. L. Vial, Comparative field responses to diel and annual thermal regimens among Sceloporine lizards, with specific reference to Sceloporus malachiticus. Rev. Biol. Trop. 32, 1-9 (1984).
243	C. F. Mueller, Temperature and energy characteristics of the sagebrush lizard (Sceloporus graciosus) in Yellowstone National Park. Copeia, 153-160 (1969).
244	J. A. Lemos-Espinal, R. E. Ballinger, Comparative thermal ecology of the high-altitude lizard Sceloporus grammicus on the eastern slope of the Iztaccihuatl volcano, Puebla, Mexico. Can. J. Zool. 73, 2184-2191 (1995).
245	T. A. Burns, Temperature of Yarrow's spiny lizard Sceloporus jarrovi at high altitudes. Herpetologica 26, 9-16 (1970).
246	G. R. Smith, R. E. Ballinger, Temperature relationships in the high-altitude viviparous lizard, Sceloporus jarrovi. Am. Midl. Nat. 131, 181-189 (1994).
247	L. J. Vitt, R. C. van Loben Sels, R. D. Ohmart, Ecological relationships among arboreal desert lizards. Ecology 62, 398-410 (1981).
248	W. S. Parker, E. R. Pianka, Notes on the ecology of the Iguanid Lizard, Sceloporus magister. Herpetologica 29, 143-152 (1973).
249	B. W. Grant, A. E. Dunham, Elevational covariation in environmental constraints and life histories of the desert lizard Sceloporus merriami. Ecology 71, 1765-1776 (1990).
250	R. B. Huey, Physiological consequences of habitat selection. Am. Nat. 137, S91-S115 (1991).
251	B. Sinervo et al., Erosion of Lizard diversity by climate change and altered thermal niches. Science 328, 894-899 (2010).
252	S. C. Adolph, Influence of behavioral thermoregulation on microhabitat use by two Sceloporus lizards. Ecology 71, 315-327 (1990).
253	M. C. Grover, Microhabitat use and thermal ecology of two narrowly sympatric Sceloporus (Phrynosomatidae) lizards. J. Herpetol., 152-160 (1996).
254	W. Blair, The rusty lizard. A population study. Austin. (The University of Texas Press, 1960).
255	W. W. Mayhew, Temperature preferences of Sceloporus orcutti. Herpetologica 18, 217-233 (1963).
256	T. Mathies, R. M. Andrews, Thermal and reproductive biology of high and low elevation populations of the lizard Sceloporus scalaris: implications for the evolution of viviparity. Oecologia 104, 101-111 (1995).
257	J. A. Lemos-Espinal, G. R. Smith, R. E. Ballinger, Sexual dimorphism and body temperatures of Sceloporus siniferus from Guerrero, México. West. N. Am. Nat. 61, 15 (2001).
258	S. R. Crowley, Thermal sensitivity of sprint-running in the lizard Sceloporus undulatus: support for a conservative view of thermal physiology. Oecologia 66, 219-225 (1985).
259	R. Gillis, Thermal biology of two populations of red-chinned lizards (Sceloporus undulatus erythrocheilus) living in different habitats in southcentral Colorado. J. Herpetol., 18-23 (1991).
260	P. Niewiarowski, S. Waldschmidt, Variation in metabolic rates of a lizard: use of SMR in ecological contexts. Funct. Ecol. 6, 15-22 (1992).
261	J. Angilletta, Michael J, Variation in metabolic rate between populations of a geographically widespread lizard. Physiological Biochemical Zoology 74, 11-21 (2001).
262	M. J. Angilletta Jr, T. Hill, M. A. Robson, Is physiological performance optimized by thermoregulatory behavior?: a case study of the eastern fence lizard, Sceloporus undulatus. J. Therm. Biol. 27, 199-204 (2002).
263	G. R. Smith, R. E. Ballinger, Thermal ecology of Sceloporus virgatus from southeastern Arizona, with comparison to Urosaurus ornatus. J. Herpetol. 28, 65-69 (1994).
264	A. F. Bennett, The thermal dependence of lizard behaviour. Anim. Behav. 28, 752-762 (1980).
265	G. R. Smith, R. E. Ballinger, Temperature relationships of the tree lizard, Urosaurus ornatus, from desert and low-elevation montane populations in the southwestern USA. J. Herpetol. 29, 126-129 (1995).
266	G. W. Ferguson, Variation and evolution of the push-up displays of the side-blotched lizard genus Uta (Iguanidae). Syst. Biol. 20, 79-101 (1971).
267	W. S. Parker, E. R. Pianka, Comparative ecology of populations of the lizard Uta stansburiana. Copeia 1975, 615-632 (1975).
268	S. Waldschmidt, C. R. Tracy, Interactions between a lizard and its thermal environment: implications for sprint performance and space utilization in the lizard Uta stansburiana. Ecology 64, 476-484 (1983).
269	Z. Arad, P. Raber, Y. L. Werner, Selected body temperature in diurnal and nocturnal forms of Ptyodactylus (Reptilia: Gekkoninae) in a photothermal gradient. J. Herpetol. 23, 103-108 (1989).
270	R. P. Brown, Thermal Biology of the Gecko Tarentola boettgeri: Comparisons among Populations from Different Elevations within Gran Canaria. Herpetologica 52, 396-405 (1996).
271	L. J. Vitt, P. A. Zani, Ecology of the nocturnal lizard Thecadactylus rapicauda (Sauria: Gekkonidae) in the Amazon region. Herpetologica, 165-179 (1997).
272	R. E. Ballinger, K. R. Marion, O. J. Sexton, Thermal ecology of the lizard, Anolis limifrons with comparative notes on three additional Panamanian anoles. Ecology 51, 246-254 (1970).
273	E. Cast et al., Natural history of an anoline lizard community in the Sierra de Baoruco, Dominican Republic. Caribb. J. Sci. 36, 258-266 (2000).
274	S. M. Sifers, M. L. Yeska, Y. M. Ramos, R. Powell, J. Parmerlee, Anolis lizards restricted to altered edge habitats in a Hispaniolan cloud forest. Caribb. J. Sci. 37, 55-62 (2001).
275	M. Leal, J. B. Losos, Behavior and ecology of the Cuban" chipojos bobos" Chamaeleolis barbatus and C. porcus. J. Herpetol. 34, 318-322 (2000).
276	K. Autumn, J. B. Losos, Notes on jumping ability and thermal biology of the enigmatic anole Chamaelinorops barbouri. J. Herpetol. 31, 442-444 (1997).
277	A. F. Bennett, G. Gorman, Population density and energetics of lizards on a tropical island. Oecologia 42, 339-358 (1979).
278	L. J. Vitt, P. A. Zani, Ecology and reproduction of Anolis capito in rain forest of southeastern Nicaragua. J. Herpetol. 39, 36-43 (2005).
279	B. C. Lister, The nature of niche expansion in West Indian Anolis lizards I: ecological consequences of reduced competition. Evolution 30, 659-676 (1976).
280	S. Lailvaux, D. Irschick, Effects of temperature and sex on jump performance and biomechanics in the lizard Anolis carolinensis. Funct. Ecol. 21, 534-543 (2007).
281	L. J. Vitt, P. A. Zani, Ecology of the elusive tropical lizard Tropidurus [= Uracentron] flaviceps (Tropiduridae) in lowland rain forest of Ecuador. Herpetologica 52, 121-132 (1996).
282	T. A. Jenssen, D. L. Marcellini, C. A. Pague, L. A. Jenssen, Competitive interference between the Puerto Rican lizards, Anolis cooki and A. cristatellus. Copeia 1984, 853-862 (1984).
283	R. B. Huey, T. P. Webster, Thermal biology of Anolis lizards in a complex fauna: the Christatellus group on Puerto Rico. Ecology 57, 985-994 (1976).
284	P. Hertz, Evaluating thermal resource partitioning. Oecologia 90, 127-136 (1992).
285	J. Lee, Comparative thermal ecology of two lizards. Oecologia 44, 171-176 (1980).
286	M. J. Corn, Upper thermal limits and thermal preferenda for three sympatric species of Anolis. J. Herpetol., 17-21 (1971).
287	L. J. Vitt, T. C. S. Avila-Pires, M. C. Espósito, S. S. Sartorius, P. A. Zani, Sharing Amazonian rain-forest trees: ecology of Anolis punctatus and Anolis transversalis (Squamata: Polychrotidae). J. Herpetol. 37, 276-286 (2003).
288	J. M. Eaton, S. C. Larimer, K. G. Howard, R. Powell, J. Parmerlee, Population densities and ecological release of the solitary lizard Anolis gingivinus in Anguilla, west Indies. Caribb. J. Sci. 38, 27-36 (2002).
289	F. H. van Berkum, Evolutionary patterns of the thermal sensitivity of sprint speed in Anolis lizards. Evolution 40, 594-604 (1986).
290	A. S. Rand, Inverse relationship between temperature and shyness in the lizard Anolis lineatopus. Ecology 45, 863-864 (1964).
291	R. Powell, Herpetology of Navassa Island, West Indies. Caribb. J. Sci. 35, 1-13 (1999).
292	R. B. Huey, T. P. Webster, Thermal biology of a solitary lizard: Anolis marmoratus of Guadeloupe, Lesser Antilles. Ecology 56, 445-452 (1975).
293	G. C. Gorman, B. Stamm, The Anolis lizards of Mona, Redonda, and La Blanquilla: chromosomes, relationships, and natural history notes. J. Herpetol., 197-205 (1975).
294	G. R. Brooks, Body temperatures of three lizards from Dominica, west Indies. Herpetologica 24, 209-214 (1968).
295	A. Malhotra, R. Thorpe, An experimental field study of a eurytopic anole, Anolis oculatus. J. Zool. 229, 163-170 (1993).
296	P. E. Hertz, Comparative thermal biology of sympatric grass anoles (Anolis semilineatus and A. olssoni) in lowland Hispaniola (Reptilia, Lacertilia, Iguanidae). J. Herpetol. 13, 329-333 (1979).
297	P. E. Hertz, Thermal passivity of a tropical forest lizard, Anolis polylepis. J. Herpetol. 8, 323-327 (1974).
298	T. R. Gasnier, W. E. Magnusson, A. P. Lima, Foraging activity and diet of four sympatric lizard species in a tropical rainforest. J. Herpetol. 28, 187-192 (1994).
299	L. J. Vitt, R. A. Souza, S. S. Sartorius, T. C. S. Avila-Pires, M. C. Espósito, Comparative ecology of sympatric Gonatodes (Squamata: Gekkonidae) in the western Amazon of Brazil. Copeia 2000, 83-95 (2000).
300	R. A. Birt, R. Powell, B. D. Greene, Natural history of Anolis barkeri: a semiaquatic lizard from southern México. J. Herpetol. 35, 161-166 (2001).
301	A. Labra, Thermoregulation in Pristidactylus lizards (Polycridae): effects of group size. J. Herpetol. 29, 260-264 (1995).
302	P. C. Withers, Physiological correlates of limblessness and fossoriality in scincid lizards. Copeia 1981, 197-204 (1981).
303	A. Greer, Critical thermal maximum temperatures in Australian scincid lizards: their ecological and evolutionary significance. Aust. J. Zool. 28, 91-102 (1980).
304	C. R. Johnson, Thermoregulation in four Australian lizards of the genus Egernia (Sauria: Scincidae). Zool. J. Linn. Soc. 60, 381-390 (1977).
305	S. Singh, A. K. Smyth, S. P. Blomberg, Thermal ecology and structural habitat use of two sympatric lizards (Carlia vivax and Lygisaurus foliorum) in subtropical Australia. Austral. Ecol. 27, 616-623 (2002).
306	E. F. Daut, R. M. Andrews, The effect of pregnancy on thermoregulatory behavior of the viviparous lizard Chalcides ocellatus. J. Herpetol. 27, 6-13 (1993).
307	E. R. Pianka, Habitat specificity, speciation, and species density in Australian desert lizards. Ecology 50, 498-502 (1969).
308	A. F. Bennett, H. John-Alder, Thermal relations of some Australian skinks (Sauria: Scincidae). Copeia 1986, 57-64 (1986).
309	F. H. Pough, M. R. Preest, M. H. Fusari, Prey-handling and the evolutionary ecology of sand-swimming lizards (Lerista: Scincidae). Oecologia 112, 351-361 (1997).
310	H. Heatwole, Reptile ecology. (University of Queensland Press, St. Lucia, Queensland, 1976).
311	R. B. Huey, A. F. Bennett, Phylogenetic studies of coadaptation: preferred temperatures versus optimal performance temperatures of lizards. Evolution 41, 1098-1115 (1987).
312	E. J. Lanham, C. M. Bull, Enhanced vigilance in groups in Egernia stokesii, a lizard with stable social aggregations. J. Zool. 263, 95-99 (2004).
313	B. S. Law, R. Bradley, Habitat use and basking site selection in the water skink, Eulamprus quoyii. J. Herpetol. 24, 235-240 (1990).
314	L. Schwarzkopf, Evidence of geographic variation in lethal temperature but not activity temperature of a lizard. J. Herpetol. 32, 102-106 (1998).
315	I. F. Spellerberg, Thermal ecology of allopatric lizards (Sphenomorphus) in southeast Australia. Oecologia 11, 1-16 (1972).
316	L. Schwarzkopf, R. Shine, Thermal biology of reproduction in viviparous skinks, Eulamprus tympanum: why do gravid females bask more? Oecologia 88, 562-569 (1991).
317	K. A. Robert, M. B. Thompson, F. Seebacher, Thermal biology of a viviparous lizard with temperature-dependant sex determination. J. Therm. Biol. 31, 292-301 (2006).
318	W.-G. Du, S.-J. Yan, X. Ji, Selected body temperature, thermal tolerance and thermal dependence of food assimilation and locomotor performance in adult blue-tailed skinks, Eumeces elegans. J. Therm. Biol. 25, 197-202 (2000).
319	M. K. Youssef, S. C. Adolph, J. Q. Richmond, Evolutionarily conserved thermal biology across continents: the North American lizard Plestiodon gilberti (Scincidae) compared to Asian Plestiodon. J. Therm. Biol. 33, 308-312 (2008).
320	E. D. Pentecost, Behavior of Eumeces laticeps exposed to a thermal gradient. J. Herpetol. 8, 169-173 (1974).
321	R. Watson, University of Texas, Arlington, (2008).
322	W. R. Dawson, Physiological responses to temperature in the lizard Eumeces obsoletus. Physiol. Zool. 33, 87-103 (1960).
323	R. F. Inger, Temperature responses and ecological relations of two Bornean lizards. Ecology 40, 127-136 (1959).
324	C. Qualls, R. Shine, Lerista bougainvillii, a case study for the evolution of viviparity in reptiles. J. Evol. Biol. 11, 63-78 (1998).
325	F. H. Hatano et al., Thermal ecology and activity patterns of the lizard community of the Restinga of Jurubatiba, Macaé, RJ. Rev. Bras. Biol. 61, 287-294 (2001).
326	D. Vrcibradic, C. F. D. Rocha, Ecology of Mabuya agilis (Raddi) (Lacertilia, Scincidae) at the restinga of Grumari, Rio de Janeiro, southeastern Brazil. Rev. Bras. Zool. 19, 19-29 (2002).
327	D. Vrcibradic, C. F. D. Rocha, The ecology of the skink Mabuya frenata in an area of rock outcrops in Southeastern Brazil. J. Herpetol. 32, 229-237 (1998).
328	D. Vrcibradic, C. F. D. Rocha, Observations on the natural history of the lizard Mabuya macrorhyncha Hoge (Scincidae) in Queimada Grande Island, São Paulo, Brazil. Rev. Bras. Zool. 22, 1185-1190 (2005).
329	L. J. Vitt, P. A. Zani, A. C. M. Lima, Heliotherms in tropical rain forest: the ecology of Kentropyx calcarata (Teiidae) and Mabuya nigropunctata (Scincidae) in the Curua-Una of Brazil. J. Trop. Ecol. 13, 199-220 (1997).
330	J. W. Patterson, Emergence, basking behaviour, mean selected temperature and critical thermal minimum in high and low altitude subspecies of the tropical lizard Mabuya striata. Afr. J. Ecol. 29, 330-339 (1991).
331	D. G. Chapple, R. Swain, Caudal autotomy does not influence thermoregulatory characteristics in the metallic skink, Niveoscincus metallicus. Amphib-Reptilia 25, 326-333 (2004).
332	A. A. Besson, A. Cree, in N. Z. J. Zool. (TAYLOR & FRANCIS LTD 2-4 PARK SQUARE, MILTON PARK, ABINGDON OR14 4RN, OXON …, 2007), vol. 34, pp. 261-261.
333	A. Besson, A. Cree, Integrating physiology into conservation: an approach to help guide translocations of a rare reptile in a warming environment. Anim. Conserv. 14, 28-37 (2011).
334	A. C. Alcala, W. C. Brown, Thermal relations of two tropical lizards on Negros Island, Philippine Islands. Copeia 1966, 593-594 (1966).
335	W. G. Du, L. Shou, J. Y. Shen, Habitat selection in two sympatric Chinese skinks, Eumeces elegans and Sphenomorphus indicus: do thermal preferences matter? Can. J. Zool. 84, 1300-1306 (2006).
336	X. Ji, X. Z. Zheng, Y. G. Xu, R. M. Sun, Some aspects of thermal biology of the skink (Eumeces chinensis). Acta Zool. Sin. 41, 268-273 (1995).
337	R. H. Mount, The natural history of the red-tailed skink, Eumeces egregius Baird. The American Midland Naturalist 70, 356-385 (1963).
338	L. Y. Borkin, V. A. Cherlin, A. M. Basarukin, M. Y. Maimin, Thermobiology of the Japanese skink, Eumeces latiscutatus, on Kunashir Island, the Southern Kuriles. Sovremennaya Gerpetologiya (Modern Herpetology) (Saratov, 2005), vol. 3–4.
339	R. M. Andrews, Activity and thermal biology of the sand-swimming skink Neoseps reynoldsi: diel and seasonal patterns. Copeia 1994, 91-99 (1994).
340	A. Al-Johany, M. Al-Sadoon, S. A. Al-Farraj, Thermal ecology and activity of the sand fish lizard, Scincus mitranus (Scincidae) in Central Arabia. Journal-King Saud University Science 11, 1-16 (1999).
341	X. Ji, P.-Y. Sun, W.-G. Du, Selected body temperature, thermal tolerance and food assimilation in a viviparous skink, Sphenomorph indic. Neth. J. Zool. 47, 103-110 (1996).
342	B. T. Firth, I. Belan, Daily and Seasonal Rhythms in Selected Body Temperatures in the Australian Lizard Tiliqua rugosa (Scincidae): Field and Laboratory Observations. Physiol. Zool. 71, 303-311 (1998).
343	B. T. Firth, I. Belan, D. J. Kennaway, R. W. Moyer, Thermocyclic entrainment of lizard blood plasma melatonin rhythms in constant and cyclic photic environments. American Journal of Physiology-Regulatory, Integrative Comparative Physiology 277, R1620-R1626 (1999).
344	K. A. Christian, J. K. Webb, T. J. Schultz, Energetics of bluetongue lizards (Tiliqua scincoides) in a seasonal tropical environment. Oecologia 136, 515-523 (2003).
345	H. Heatwole, B. T. Firth, G. J. Webb, Panting thresholds of lizards—I. some methodological and internal influences on the panting threshold of an agamid, Amphibolurus muricatus. Comparative Biochemistry Physiology Part A: Physiology 46, 799-826 (1973).
346	J. Hebrard, S. Reilly, M. Guppy, Thermal ecology of Chamaeleo hoehnelii and Mobuya varia in the Aberdare mountains: constraints of heterothermy in an alpine habitat. Jounary of East African Natural History Society 176, 1-6 (1982).
347	L. J. Vitt, S. S. Sartorius, T. C. S. Avila-Pires, P. A. Zani, M. C. Espósito, Small in a big world: ecology of leaf-litter geckos in new world tropical forests. Herpetol. Monogr. 19, 137-152 (2005).
348	L. J. Vitt, P. A. Zani, A. A. M. de Barros, Ecological variation among populations of the gekkonid lizard Gonatodes humeralis in the Amazon Basin. Copeia, 32-43 (1997).
349	E. Arnold, Histoircal changes in the ecology and behaviour of semaphore geckos (Pristurus, Gekkonidae) and their relatives. J. Zool. 229, 353-384 (1993).
350	D. Semenov, L. Borkin, On the ecology of Przewalsky’s gecko (Teratoscincus przewalskii) in the Transaltai Gobi, Mongolia. Asiatic Herpetological Research 4, 99-112 (1992).
351	K. Autumn, R. B. Weinstein, R. J. Full, Low cost of locomotion increases performance at low temperature in a nocturnal lizard. Physiol. Zool. 67, 238-262 (1994).
352	R. B. Huey, C. R. Peterson, S. J. Arnold, W. P. Porter, Hot rocks and not‐so‐hot rocks: retreat‐site selection by garter snakes and its thermal consequences. Ecology 70, 931-944 (1989).
353	J. R. Scott, C. R. Tracy, D. Pettus, A biophysical analysis of daily and seasonal utilization of climate space by a montane snake. Ecology 63, 482-493 (1982).
354	L. J. Vitt, G. R. Colli, Geographical ecology of a neotropical lizard: Ameiva ameiva (Teiidae) in Brazil. Can. J. Zool. 72, 1986-2008 (1994).
355	J. J. Schall, Relations among three macroteiid lizards on Aruba Island. J. Herpetol., 289-295 (1973).
356	P. T. Schell, R. Powell, J. S. Parmerlee, A. Lathrop, D. D. Smith, Notes on the natural history of Ameiva chrysolaema (Sauria: Teiidae) from Barahona, Dominican Republic. Copeia 1993, 859-862 (1993).
357	A. L. Sproston et al., Niche differences among three sympatric species of Ameiva (Reptilia: Teiidae) on Hispaniola. J. Herpetol. 33, 131-136 (1999).
358	N. Rivera-Vélez, A. R. Lewis, Threshold temperatures and the thermal cycle of a heliothermic lizard. J. Herpetol. 28, 1-6 (1994).
359	L. J. Vitt, P. A. Zani, Ecology of the lizard Ameiva festiva (Teiidae) in southeastern Nicaragua. J. Herpetol. 30, 110-117 (1996).
360	J. J. Schall, Thermal ecology of five sympatric species of Cnemidophorus (Sauria: Teiidae). Herpetologica 33, 261-272 (1977).
361	D. L. Bostic, Thermoregulation and hibernation of the lizard, Cnemidophorus hyperythrus beldingi (Sauria: Teiidae). The Southwestern Naturalist 11, 275-289 (1966).
362	M. A. Paulissen, Ontogenetic comparison of body temperature selection and thermal tolerance of Cnemidophorus sexlineatus. J. Herpetol. 22, 473-476 (1988).
363	B. W. Witz, Aspects of the thermal biology of the six-lined racerunner, Cnemidophorus sexlineatus (Squamata: Teiidae) in west-central Florida. J. Therm. Biol. 26, 529-535 (2001).
364	E. R. Pianka, Comparative autecology of the lizard Cnemidophorus tigris in different parts of its georgraphic range. Ecology 51, 703-720 (1970).
365	D. O. Mesquita, G. R. Colli, Geographical variation in the ecology of populations of some Brazilian species of Cnemidophorus (Squamata, Teiidae). Copeia 2003, 285-298 (2003).
366	L. J. Vitt, P. A. Zani, J. P. Caldwell, E. O. Carrillo, Ecology of the lizard Kentropyx pelviceps (Sauria: Teiidae) in lowland rain forest of Ecuador. Can. J. Zool. 73, 691-703 (1995).
367	D. O. Mesquita, G. R. Colli, The ecology of Cnemidophorus ocellifer (Squamata, Teiidae) in a neotropical savanna. J. Herpetol. 37, 498-510 (2003).
368	L. J. Vitt, S. S. Sartorius, T. C. S. Avila-Pires, M. C. Espósito, Life at the river's edge: ecology of Kentropyx altamazonica in Brazilian Amazonia. Can. J. Zool. 79, 1855-1865 (2001).
369	L. J. Vitt, Ecology and life history of the wide-foraging lizard Kentropyx calcarata (Teiidae) in Amazonian Brazil. Can. J. Zool. 69, 2791-2799 (1991).
370	L. J. Vitt, C. M. d. Carvalho, Life in the trees: the ecology and life history of Kentropyx striatus (Teiidae) in the lavrado area of Roraima, Brazil, with comments on the life histories of tropical teiid lizards. Can. J. Zool. 70, 1995-2006 (1992).
371	R. E. Gatten Jr, R. M. McClung, Thermal selection by an amphisbaenian, Trogonophis wiegmanni. J. Therm. Biol. 6, 49-51 (1981).
372	P. López, E. Civantos, J. Martín, Body temperature regulation in the amphisbaenian Trogonophis wiegmanni. Can. J. Zool. 80, 42-47 (2002).
373	T. Kohlsdorf, C. A. Navas, Ecological constraints on the evolutionary association between field and preferred temperatures in Tropidurinae lizards. Evol. Ecol. 20, 549-564 (2006).
374	M. C. Kiefer, M. Van Sluys, C. F. Rocha, Body temperatures of Tropidurus torquatus (Squamata, Tropiduridae) from coastal populations: Do body temperatures vary along their geographic range? J. Therm. Biol. 30, 449-456 (2005).
375	N. Ibargüengoytía, Field, selected body temperature and thermal tolerance of the syntopic lizards Phymaturus patagonicus and Liolaemus elongatus (Iguania: Liolaemidae). J. Arid Environ. 62, 435-448 (2005).
376	R. C. Stebbins, J. M. Lowenstein, N. W. Cohen, A field study of the lava lizard (Tropidurus albemarlensis) in the Galapagos Islands. Ecology 48, 839-851 (1967).
377	C. C. Carpenter, Miscellaneous notes on Galapagos lava lizards (Tropidurus: Iguanidae). Herpetologica 26, 377-386 (1970).
378	M. Sepúlveda, M. A. Vidal, J. M. Fariña, P. Sabat, Seasonal and geographic variation in thermal biology of the lizard Microlophus atacamensis (Squamata: Tropiduridae). J. Therm. Biol. 33, 141-148 (2008).
379	R. B. Huey, Winter thermal ecology of the iguanid lizard Tropidurus peruvianus. Copeia 1974, 149-155 (1974).
380	A. Catenazzi, J. Carrillo, M. A. Donnelly, Seasonal and geographic eurythermy in a coastal Peruvian lizard. Copeia 2005, 713-723 (2005).
381	L. J. Vitt, Ecology and life history of the scansorial arboreal lizard Plica plica (Iguanidae) in Amazonian Brazil. Can. J. Zool. 69, 504-511 (1991).
382	L. J. Vitt, P. A. Zani, J. P. Caldwell, Behavioural ecology of Tropidurus hispidus on isolated rock outcrops in Amazonia. J. Trop. Ecol. 12, 81-101 (1996).
383	M. Van Sluys, C. F. D. Rocha, D. Vrcibradic, C. A. B. Galdino, A. F. Fontes, Diet, activity, and microhabitat use of two syntopic Tropidurus species (Lacertilia: Tropiduridae) in Minas Gerais, Brazil. J. Herpetol. 38, 606-612 (2004).
384	L. B. Ribeiro, S. C. Gomides, A. O. Santos, B. M. Sousa, Thermoregulatory behavior of the saxicolous lizard, Tropidurus torquatus (Squamata: Tropiduridae), in a rocky outcrop in Minas Gerais, Brazil. Herpetological Conservation Biology 3, 63-70 (2008).
385	M. Van Sluys, Aspectos da ecologia do lagarto Tropidurus itambere (Tropiduridae), em uma área do sudeste do Brasil. Rev. Bras. Biol. 52, 181-185 (1992).
386	R. Faria, A. Araujo, Sintopy of two Tropidurus lizard species (Squamata: Tropiduridae) in a rocky cerrado habitat in central Brazil. Braz. J. Biol. 64, 775-786 (2004).
387	L. Aun, R. Martori, Aspects of the ecology of a population of Tropidurus spinulosus. Amphib-Reptilia 15, 317-321 (1994).
388	J. M. Howland, L. J. Vitt, P. T. Lopez, Life on the edge: the ecology and life history of the tropidurine iguanid lizard Uranoscodon superciliosum. Can. J. Zool. 68, 1366-1373 (1990).
389	E. D. Wikramanayake, G. L. Dryden, Thermal ecology of habitat and microhabitat use by sympatric Varanus bengalensis and V. salvator in Sri Lanka. Copeia 1993, 709-714 (1993).
390	E. Pianka, Observations on the ecology of Varanus in the Great Victoria Desert. West. Aust. Nat. 15, 1-8 (1982).
391	S. C. Wood, K. Johansen, M. L. Glass, G. M. O. Maloiy, Aerobic metabolism of the lizard Varanus exanthematicus: Effects of activity, temperature, and size. J. Comp. Physiol. 127, 331-336 (1978).
392	M. Don, A. Estany, A. Ramos, R. Leoni, A. Muchlinski, Re-examination of the afebrile response in two lizard species (Varanus exanthematicus and Gerrhosaurus major). J. Herpetol. 28, 385-388 (1994).
393	D. King, B. Green, H. Butler, The activity pattern, temperature regulation and diet of Varanus giganteus on barrow-island, western-Australia. Wildl. Res. 16, 41-47 (1989).
394	D. King, The thermal biology of free-living sand goannas (Varanus gouldii) in southern Australia. Copeia 1980, 755-767 (1980).
395	K. A. Christian, B. W. Weavers, Thermoregulation of monitor lizards in Australia: an evaluation of methods in thermal biology. Ecol. Monogr. 66, 139-157 (1996).
396	A. A. Ibrahim, Activity area, movement patterns, and habitat use of the desert monitor, Varanus griseus, in the zaranik protected area, north Sinai, Egypt. Afr. J. Herpetol. 51, 35-45 (2002).
397	J. G. Smith, K. Christian, B. Green, Physiological ecology of the mangrove-dwelling varanid Varanus indicus. Physiological Biochemical Zoology 81, 561-569 (2008).
398	B. K. McNab, W. Auffenberg, The effect of large body size on the temperature regulation of the komodo dragon, Varanus komodoensis. Comparative Biochemistry and Physiology Part A: Physiology 55, 345-350 (1976).
399	H. F. Hirth, E. M. A. Latif, Deep body temperatures of the Nile monitor (Varanus niloticus) taken by radiotelemetry. J. Herpetol. 13, 367-368 (1979).
400	K. Christian, B. Weavers, Analysis of the activity and energetics of the lizard Varanus rosenbergi. Copeia 1994, 289-295 (1994).
401	C. Træholt, A radio-telemetric study of the thermoregulation of free living water monitor lizards, Varanus s. salvator. J. Comp. Physiol. B 165, 125-131 (1995).
402	R. C. Stebbins, R. E. Barwick, Radiotelemetric study of thermoregulation in a lace monitor. Copeia 1968, 541-547 (1968).
403	J. S. Sanders, J. S. Jacob, Thermal ecology of the copperhead (Agkistrodon contortrix). Herpetologica 37, 264-270 (1981).
404	S.-M. Huang, S.-P. Huang, Y.-H. Chen, M.-C. Tu, Thermal tolerance and altitudinal distribution of three Trimeresurus Snakes (Viperidae: Crotalinae) in Taiwan. Zool. Stud. 46, 592-599 (2007).
405	W. J. Mautz, C. B. Daniels, A. F. Bennett, Thermal dependence of locomotion and aggression in a xantusiidae lizard. Herpetologica 48, 271-279 (1992).
406	W. J. Mautz, T. J. Case, A diurnal activity cycle in the granite night lizard, Xantusia henshawi. Copeia 1974, 243-251 (1974).
407	D. J. Morafka, B. H. Banta, The distribution and microhabitat of Xantusia vigilis (Reptilia: Lacertilia) in the Pinnacles National Monument, San Benito and Monterey Counties, California. J. Herpetol. 7, 97-108 (1973).
408	J. S. Kaufmann, A. F. Bennett, The effect of temperature and thermal acclimation on locomotor performance in Xantusia vigilis, the desert night lizard. Physiol. Zool. 62, 1047-1058 (1989).
409	R. E. Ballinger, J. Lemos-Espinal, S. Sanoja-Sarabia, N. R. Coady, Ecological observations of the lizard, Xenosaurus grandis in Cuautlapán, Veracruz, México. Biotropica 27, 128-132 (1995).
410	J. A. Lemos-Espinal, G. R. Smith, R. E. Ballinger, Ecology of Xenosaurus grandis agrenon, a knob-scaled lizard from Oaxaca, México. J. Herpetol. 37, 192-196 (2003).
411	J. A. Lemos-Espinal, G. R. Smith, Natural history of Xenosaurus phalaroanthereon (Squamata, Xenosauridae), a knob-scaled lizard from Oaxaca, Mexico. Phyllomedusa: Journal of Herpetology 4, 133-137 (2005).
412	A. Clarke, P. Rothery, Scaling of body temperature in mammals and birds. Funct. Ecol. 22, 58-67 (2008).
413	B. K. McNab, The ecological energetics of birds in New Guinea. (University of Florida, 2013).
414	L. I. Doucette, F. Geiser, Seasonal variation in thermal energetics of the Australian owlet-nightjar (Aegotheles cristatus). Comparative Biochemistry Physiology Part A 151, 615-620 (2008).
415	B. I. Tieleman, J. B. Williams, Cutaneous and respiratory water loss in larks from arid and mesic environments. Physiological Biochemical Zoology 75, 590-599 (2002).
416	W. A. Buttemer, S. C. Nicol, A. Sharman, Thermoenergetics of pre-moulting and moulting kookaburras (Dacelo novaeguineae): they're laughing. J. Comp. Physiol. B 173, 223-230 (2003).
417	F. Mehlum, G. W. Gabrielsen, J. R. E. Taylor, M. Konarzewski, Field and laboratory metabolism and thermoregulation in Dovekies (Alle alle). The Auk 108, 71-78 (1991).
418	D. A. Croll, E. McLaren, Diving metabolism and thermoregulation in common and thick-billed murres. J. Comp. Physiol. B 163, 160-166 (1993).
419	G. W. Gabrielsen, F. Mehlum, H. E. Karlsen, Thermoregulation in four species of arctic seabirds. J. Comp. Physiol. B 157, 703-708 (1988).
420	B. K. McNab, The energetics of new zealand's ducks. Comparative Biochemistry Physiology Part A 135, 229-247 (2003).
421	L. Irving, H. Krog, M. Monson, The metabolism of some Alaskan animals in winter and summer. Physiol. Zool. 28, 173-185 (1955).
422	B. K. McNab, F. J. Bonaccorso, The energetics of Australasian swifts, frogmouths, and nightjars. Physiol. Zool. 68, 245-261 (1995).
423	J. R. King, D. S. Farner, Energy metabolism, thermoregulation and body temperature. A. J. Marshall, Ed., Biology comparative physiology of birds (Academic Press, London, 1961), vol. 2, pp. 215-288.
424	B. K. McNab, Metabolism and temperature regulation of kiwis (Apterygidae). The Auk 113, 687-692 (1996).
425	B. K. McNab, Energetics of toucans, a barbet, and a hornbill: Implications for avian frugivory. The Auk 118, 916-933 (2001).
426	Z. Harji, Johann Wolfgang Goethe-Universität Frankfurt am Main, (2002).
427	W. R. Dawson, C. D. Fisher, Observations on the temperature regulation and water economy of the galah (Cacatua roseicapilla). Comparative Biochemistry and Physiology Part A: Physiology 72, 1-10 (1982).
428	P. F. Scholander, R. Hock, V. Walters, F. Johnson, L. Irving, Heat regulation in some arctic and tropical mammals and birds. Biol. Bull. 99, 237-258 (1950).
429	J. E. Lane, D. L. Swanson, R. M. Brigham, A. E. McKechnie, Physiological responses to temperature by whip-poor-wills: more evidence for the evolution of low metabolic rates in caprimulgiformes. The Condor 106, 921-925 (2004).
430	R. C. Lasiewski, W. R. Dawson, Physiological responses to temperature in the common nighthawk. The Condor 66, 477-490 (1964).
431	G. A. Bartholomew, J. W. Hudson, T. R. Howell, Body temperature, oxygen consumption, evaporative water loss, and heart rate in the poor-will. The Condor 64, 117-125 (1962).
432	D. S. Hinds, W. A. Calder, Temperature regulation of the pyrrhuloxia and the Arizona cardinal. Physiol. Zool. 46, 55-71 (1973).
433	F. G. Benedict, E. L. Fox, The gaseous metabolism of large wild birds under aviary life. Proc. Am. Philos. Soc. 66, 511-534 (1927).
434	D. E. Murrish, Responses to temperature in the dipper, Cinclus mexicanus. Comparative Biochemistry Physiology 34, 859-869 (1970).
435	B. K. McNab, Food habits and the evolution of energetics in birds of paradise (Paradisaeidae). J. Comp. Physiol. B 175, 117-132 (2005).
436	A. E. McKechnie, B. G. Lovegrove, Thermoregulation and the energetic significance of clustering behavior in the white-backed mousebird (Colius colius). Physiological Biochemical Zoology 74, 238-249 (2001).
437	B. McNab, F. Bonaccorso, The metabolism of New Guinean pteropodid bats. J. Comp. Physiol. B 171, 201-214 (2001).
438	R. Prinzinger, Energy metabolism, body-temperature and breathing parameters in nontorpid blue-naped mousebirds Urocolius macrourus. J. Comp. Physiol. B 157, 801-806 (1988).
439	B. K. McNab, The influence of body mass, climate, and distribution on the energetics of South Pacific pigeons. Comparative Biochemistry Physiology Part A: Molecular Integrative Physiology 127, 309-329 (2000).
440	W. A. Calder, K. Schmidt-Nielsen, Temperature regulation and evaporation in the pigeon and the roadrunner. American Journal of Physiology-Legacy Content 213, 883-889 (1967).
441	R. E. MacMillen, C. H. Trost, Thermoregulation and water loss in the Inca dove. Comp. Biochem. Physiol. 20, 263-273 (1967).
442	E. Schleucher, Metabolism, body temperature and thermal conductance of fruit-doves (Aves: Columbidae, Treroninae). Comparative Biochemistry Physiology Part A: Molecular Integrative Physiology 131, 417-428 (2002).
443	E. Schleucher, R. Prinzinger, P. C. Withers, Life in extreme environments: investigations on the ecophysiology of a desert bird, the Australian diamond dove (Geopelia cuneata Latham). Oecologia 88, 72-76 (1991).
444	W. R. Dawson, A. F. Bennett, Roles of metabolic level and temperature regulation in the adjustment of western plumed pigeons (Lophophaps ferruginea) to desert conditions. Comparative Biochemistry and Physiology Part A: Physiology 44, 249-266 (1973).
445	N. J. Mann, Comparative physiology of the scrub jay (Aphelocoma coerulescens) and the Steller's jay (Cyanocitta stelleri). Comparative Biochemistry Physiology Part A: Physiology 76, 305-318 (1983).
446	A. M. Hayworth, W. W. Weathers, Temperature regulation and climatic adaptation in black-billed and yellow-billed magpies. The Condor 86, 19-26 (1984).
447	M. Simone, Johann Wolfgang Goethe-Universität Frankfurt am Main, (2003).
448	U. Marschall, R. Prinzinger, Vergleichende ökophysiologie von fünf prachtfinkenarten (Estrildidae). Journal für Ornithologie 132, 319-323 (1991).
449	C. T. Burton, W. W. Weathers, Energetics and thermoregulation of the Gouldian Finch (Erythrura gouldiae). Emu 103, 1-10 (2003).
450	T. J. Cade, C. A. Tobin, A. Gold, Water economy and metabolism of two estrildine finches. Physiol. Zool. 38, 9-33 (1965).
451	B. G. Lovegrove, G. A. Smith, Is ‘nocturnal hypothermia’a valid physiological concept in small birds?: a study on Bronze Mannikins Spermestes cucullatus. Ibis 145, 547-557 (2003).
452	J. S. Wasser, The relationship of energetics of falconiform birds to body mass and climate. The Condor 88, 57-62 (1986).
453	N. Bush, M. Brown, C. Downs, Seasonal effects on thermoregulatory responses of the Rock Kestrel, Falco rupicolis. J. Therm. Biol. 33, 404-412 (2008).
454	W. Weathers, C. Shapiro, L. Astheimer, Metabolic responses of Cassin's finches (Carpodacus cassinii) to temperature. Comparative Biochemistry Physiology Part A: Physiology 65, 235-238 (1980).
455	W. R. Dawson, W. A. Buttemer, C. Carey, A reexamination of the metabolic response of house finches to temperature. The Condor 87, 424-427 (1985).
456	W. W. Weathers, Physiological thermoregulation in heat-stressed birds: consequences of body size. Physiol. Zool. 54, 345-361 (1981).
457	R. Lewies, M. Dyer, Respiratory metabolism of the red-winged blackbird in relation to ambient temperature. The Condor 71, 291-298 (1969).
458	S. Soobramoney, C. Downs, N. Adams, Physiological variability in the fiscal shrike Lanius collaris along an altitudinal gradient in South Africa. J. Therm. Biol. 28, 581-594 (2003).
459	R. R. Moldenhauer, The effects of temperature on the metabolic rate and evaporative water loss of the sage sparrow Amphispiza belli nevadensis. Comparative Biochemistry Physiology 36, 579-587 (1970).
460	A. Lill, J. Box, J. Baldwin, Do metabolism and contour plumage insulation vary in response to seasonal energy bottlenecks in superb fairy-wrens? Aust. J. Zool. 54, 23-30 (2006).
461	D. T. Booth, Metabolism in malleefowl (Leipoa ocellata). Comparative Biochemistry Physiology Part A: Physiology 92, 207-209 (1989).
462	B. G. Collins, G. Cary, S. Payne, Metabolism, thermoregulation and evaporative water loss in two species of Australian nectar-feeding birds (Family Meliphagidae). Comparative Biochemistry Physiology, A 67, 629-635 (1980).
463	R. Prinzinger, I. Lübben, K.-L. Schuchmann, Energy metabolism and body temperature in 13 sunbird species (Nectariniidae). Comparative Biochemistry Physiology Part A: Physiology 92, 393-402 (1989).
464	N. Seavy, Physiological correlates of habitat association in East African sunbirds (Nectariniidae). J. Zool. 270, 290-297 (2006).
465	J. W. Hudson, A. H. Brush, A comparative study of the cardiac and metabolic performance of the dove, Zenaidura macroura, and the quail, Lophortyxcalifornicus. Comparative biochemistry physiology 12, 157-170 (1964).
466	E. ZERBA, G. E. WALSBERG, Exercise-generated heat contributes to thermoregulation by Gambel's quail in the cold. J. Exp. Biol. 171, 409-422 (1992).
467	B. I. Tieleman, J. B. Williams, F. LaCroix, P. Paillat, Physiological responses of Houbara bustards to high ambient temperatures. J. Exp. Biol. 205, 503-511 (2002).
468	S. J. Cooper, J. A. Gessaman, Thermoregulation and Habitat Preference in Mountain Chickadees and Juniper Titmice. The Condor 106, 852-861 (2004).
469	J. D. Rising, J. W. Hudson, Seasonal variation in the metabolism and thyroid activity of the black-capped chickadee (Parus atricapillus). The Condor 76, 198-203 (1974).
470	J. W. Hudson, S. L. Kimzey, Temperature regulation and metabolic rhythms in populations of the house sparrow, Passer domesticus. Comparative Biochemistry Physiology 17, 203-217 (1966).
471	J. Marder, R. Bernstein, Heat balance of the partridge Alectoris chukar exposed to moderate, high and extreme thermal stress. Comparative Biochemistry Physiology. A, Comparative Physiology 74, 149-154 (1983).
472	R. Frumkin, B. Pinshow, Y. Weinstein, Metabolic heat production and evaporative heat loss in desert phasianids: chukar and sand partridge. Physiol. Zool. 59, 592-605 (1986).
473	J. Roberts, R. Baudinette, Thermoregulation, oxygen-consumption and water turnover in stubble quail, Coturnix pectoralis, and king quail, Coturnix chinensis. Aust. J. Zool. 34, 25-33 (1986).
474	A. Mortensen, A. Blix, Seasonal changes in resting metabolic rate and mass-specific conductance in Svalbard ptarmigan, Norwegian rock ptarmigan and Norwegian willow ptarmigan. Ornis Scandinavica, 8-13 (1986).
475	R. E. Johnson, University of Montana, (1968).
476	Y. Luo et al., Metabolism and thermoregulation between Mrs Hume’s Pheasant (Syrmaticus humiae) and Elliot’s Pheasant (S. ellioti). Zool. Res. 32, 396-402 (2011).
477	C. Boix-Hinzen, B. Lovegrove, Circadian metabolic and thermoregulatory patterns of red-billed woodhoopoes (Phoeniculus purpureus): the influence of huddling. J. Zool. 244, 33-41 (1998).
478	G. A. Bartholomew, C. M. Vleck, T. L. Bucher, Energy metabolism and nocturnal hypothermia in two tropical passerine frugivores, Manacus vitellinus and Pipra mentalis. Physiol. Zool. 56, 370-379 (1983).
479	T. R. Howell, G. A. Bartholomew, Temperature regulation in Laysan and Black-footed Albatrosses. The Condor 63, 185-197 (1961).
480	S. Burton, M. R. Perrin, C. T. Downs, Thermal biology of African lovebirds and Australian grass parakeets. J. Therm. Biol. 33, 355-362 (2008).
481	T. L. Bucher, Ventilation and oxygen consumption in Amazona viridigenalis. J. Comp. Physiol. B 155, 269-276 (1985).
482	T. L. Bucher, Oxygen consumption, ventilation and respiratory heat loss in a parrot, Bolborhynchus lineola, in relation to ambient temperature. J. Comp. Physiol. 142, 479-488 (1981).
483	M. M. Zungu, M. Brown, C. T. Downs, Seasonal thermoregulation in the burrowing parrot (Cyanoliseus patagonus). J. Therm. Biol. 38, 47-54 (2013).
484	B. K. McNab, C. A. Salisbury, Energetics of New Zealand's temperate parrots. N. Z. J. Zool. 22, 339-349 (1995).
485	W. Weathers, D. Schoenbaechler, Regulation of body temperature in the Budherygah, Melopsittacus undulatus. Aust. J. Zool. 24, 39-47 (1976).
486	W. W. Weathers, D. F. Caccamise, Temperature regulation and water requirements of the monk parakeet, Myiopsitta monachus. Oecologia 18, 329-342 (1975).
487	W.-H. Zheng, J.-S. Liu, X.-H. Jiang, Y.-Y. Fang, G.-K. Zhang, Seasonal variation on metabolism and thermoregulation in Chinese bulbul. J. Therm. Biol. 33, 315-319 (2008).
488	B. K. McNab, H. I. Ellis, Flightless rails endemic to islands have lower energy expenditures and clutch sizes than flighted rails on islands and continents. Comparative Biochemistry Physiology Part A: Molecular Integrative Physiology 145, 295-311 (2006).
489	R. Prinzinger, A. Misovic, E. Schleucher, Energieumsatz und Körpertemperatur bei der Zwergwachtel (Coturnix chinensis) und beim Bindenlaufhühnchen (Turnix suscitator). Journal für Ornithologie 134, 79-84 (1993).
490	R. Brent, P. Pedersen, C. Bech, K. Johansen, Thermal balance in the European coot Fulica atra exposed to temperatures from-28 ℃ to 40 ℃. Ornis Scandinavica 16, 145-150 (1985).
491	J. R. Templeton, J. N. Mugaas, Thermoregulation in the red-breasted nuthatch (Sitta Canadensis). The Condor: Ornithological Applications 72, 125-132 (1970).
492	A. Wetmore, A study of the body temperature of birds. Smithsonian Miscellaneous Collections 72, 1-51 (1921).
493	S. E. Richman, J. R. Lovvorn, Effects of air and water temperatures on resting metabolism of auklets and other diving birds. Physiological and Biochemical Zoology: Ecological and Evolutionary Approaches 84, 316-332 (2011).
494	J. D. Ligon, Some aspects of temperature relations in small owls. The Auk 86, 458-472 (1969).
495	E. Hohtola, A. Pyörnilä, H. Rintamäki, Fasting endurance and cold resistance without hypothermia in a small predatory bird: the metabolic strategy of Tengmalm's owl, Aegolius funereus. J. Comp. Physiol. B 164, 430-437 (1994).
496	H. N. Coulombe, Physiological and physical aspects of temperature regulation in the burrowing owl Speotyto cunicularia. Comparative Biochemistry Physiology 35, 307-337 (1970).
497	J. L. Ganizy, R. P. Balda, R. M. Kings, Metabolic rate and evaporative water loss of Mexican spotted and great horned owls. Wilson Bull. 105, 645-656 (1993).
498	J. D. Ligon, The biology of the Elf Owl, Micrathene whitneyi. (Museum of Zoology, University of Michigan, 1968).
499	B. Smit, M. Brown, C. Downs, Thermoregulatory responses in seasonally acclimatized captive southern white-faced scops-owls. J. Therm. Biol. 33, 76-86 (2008).
500	C. Bech, K. E. Præsteng, Thermoregulatory use of heat increment of feeding in the tawny owl (Strix aluco). J. Therm. Biol. 29, 649-654 (2004).
501	L. Lin, L. Wang, J. Liu, Metabolism and thermoregulation in crested mynas (Acridotheres cristatellus). Chin. J. Zool. 45, 47-53 (2010).
502	S. C. Chamane, C. T. Downs, Seasonal effects on metabolism and thermoregulation abilities of the red-winged starling (Onychognathus morio). J. Therm. Biol. 34, 337-341 (2009).
503	R. Dmi'el, D. Tel-Tzur, Heat balance of two starling species (Sturnus vulgaris and Onychognathus tristrami) from temperate and desert habitats. J. Comp. Physiol. B 155, 395-402 (1985).
504	S. S. Steiger, J. P. Kelley, W. W. Cochran, M. Wikelski, Low metabolism and inactive lifestyle of a tropical rain forest bird investigated via heart-rate telemetry. Physiological Biochemical Zoology 82, 580-589 (2009).
505	R. Ehlers, M. L. Morton, Metabolic rate and evaporative water loss in the least seed-snipe, Thinocorus rumicivorus. Comparative Biochemistry Physiology Part A: Physiology 73, 233-235 (1982).
506	M. Merola-Zwartjes, Metabolic rate, temperature regulation, and the energetic implications of roost nests in the Bananaquit (Coereba flaveola). The Auk 115, 780-786 (1998).
507	A. Mata, Metabolic rate and specific dynamic action of the red-legged honeycreeper, a nectar-feeding Neotropical passerine. Comparative Biochemistry Physiology Part A: Molecular Integrative Physiology 157, 291-296 (2010).
508	W. W. Weathers, Energetics and thermoregulation by small passerines of the humid, lowland tropics. The Auk 114, 341-353 (1997).
509	P. C. Withers, R. B. Forbes, M. S. Hedrick, Metabolic, water and thermal relations of the Chilean tinamou. The Condor 89, 424-426 (1987).
510	M. Merola-Zwartjes, J. D. Ligon, Ecological energetics of the Puerto Rican tody: heterothermy, torpor, and intra‐island variation. Ecology 81, 990-1003 (2000).
511	L. S. Eberhardt, Oxygen consumption during singing by male Carolina wrens (Thryothorus ludovicianus). The Auk 111, 124-130 (1994).
512	T. C. Edwards, Standard rate of metabolism in the common barn owl (Tyto alba). The Wilson Bulletin 99, 704-706 (1987).
513	T. A. Maddocks, F. Geiser, Energetics, thermoregulation and nocturnal hypothermia in Australian silvereyes. The Condor 99, 104-112 (1997).
514	A. Clarke, P. Rothery, N. J. B. Isaac, Scaling of basal metabolic rate with body mass and temperature in mammals. J. Anim. Ecol. 79, 610-619 (2010).
515	B. K. McNab, The comparative energetics of neotropical marsupials. Journal of Comparative Physiology B: Biochemical, Systemic, Environmental Physiology 125, 115-128 (1978).
516	B. K. McNab, Energy expenditure and conservation in frugivorous and mixed-diet carnivorans. J. Mammal. 76, 206-222 (1995).
517	B. K. McNab, Energy conservation in a tree-kangaroo (Dendrolagus matschiei) and the red panda (Ailurus fulgens). Physiol. Zool. 61, 280-292 (1988).
518	Y. Le Maho, M. Goffart, A. Rochas, H. Felbabel, J. Chatonnet, Thermoregulation in the only nocturnal simian: the night monkey Aotus trivirgatus. American Journal of Physiology-Regulatory, Integrative Comparative Physiology 240, R156-R165 (1981).
519	B. K. McNab, The influence of body size on the energetics and distribution of fossorial and burrowing mammals. Ecology 60, 1010-1021 (1979).
520	N. Bennett, G. Aguilar, J. Jarvis, C. Faulkes, Thermoregulation in three species of Afrotropical subterranean mole-rats (Rodentia: Bathyergidae) from Zambia and Angola and scaling within the genus Cryptomys. Oecologia 97, 222-227 (1994).
521	B. Lovegrove, The metabolism of social subterranean rodents: adaptation to aridity. Oecologia 69, 551-555 (1986).
522	B. Lovegrove, Thermoregulation in the subterranean rodent Georychus capensis (Rodentia: Bathyergidae). Physiol. Zool. 60, 174-180 (1987).
523	B. K. McNab, The metabolism of fossorial rodents: a study of convergence. Ecology 47, 712-733 (1966).
524	C. Holmes, Y. Moore, in Proc. N. Z. Soc. Anim. Prod. (1981), vol. 41, pp. 163-166.
525	P. Luiting et al., Effects of high ambient temperatures on the metabolism of West African dwarf goats. I. Int. J. Biometeorol. 29, 11-22 (1985).
526	C. Taylor, J. Sale, Temperature regulation in the hyrax. Comparative Biochemistry Physiology 31, 903-907 (1969).
527	M. Maskrey, P. Hoppe, Thermoregulation and oxygen consumption in Kirk's dik-dik (Madoqua kirkii) at ambient temperatures of 10–45° C. Comparative Biochemistry Physiology Part A: Physiology 62, 827-830 (1979).
528	A. Haim, P. Racey, J. Speakman, G. Ellison, J. Skinner, Seasonal acclimatization and thermoregulation in the pouched mouse Saccostomus campestris. J. Therm. Biol. 16, 13-17 (1991).
529	J. Weiner, G. Heldmaier, Metabolism and thermoregulation in two races of Djungarian hamsters: Phodopus sungorus sungorus and P. s. campbelli. Comparative Biochemistry Physiology. A, Comparative Physiology 86, 639-642 (1987).
530	B. Collins, The ecological significance of thermoregulatory responses to heat stress shown by two populations of an Australian murid, Rattus fuscipes. Comparative Biochemistry Physiology Part A: Physiology 44, 1129-1140 (1973).
531	S. Morton, A. Lee, Thermoregulation and metabolism in Planigale maculata (Marsupialia: Dasyuridae). J. Therm. Biol. 3, 117-120 (1978).
532	M. R. Fleming, The Thermal Physiology of the Feathertail Glider, Acrobates Pygmaeus (Marsupialia: Burramyidae). Aust. J. Zool. 33, 667-681 (1985).
533	F. Geiser, Hibernation and daily torpor in two pygmy possums (Cercartetus spp., Marsupialia). Physiol. Zool. 60, 93-102 (1987).
534	G. A. Bartholomew, R. E. MacMillen, Oxygen consumption, estivation, and hibernation in the kangaroo mouse, Microdipodops pallidus. Physiol. Zool. 34, 177-183 (1961).
535	M. Genoud, R. D. Martin, D. Glaser, Rate of metabolism in the smallest simian primate, the pygmy marmoset (Cebuella pygmaea). Am. J. Primatol. 41, 229-245 (1997).
536	R. T. Golightly Jr, R. D. Ohmart, Metabolism and body temperature of two desert canids: coyotes and kit foxes. J. Mammal. 64, 624-635 (1983).
537	C. T. Downs, J. M. Bowland, A. E. Bowland, M. R. Perrin, Thermal parameters of serval Felis serval (Felidae) and blackbacked jackal Canis mesomelas (Canidae). J. Therm. Biol. 16, 277-279 (1991).
538	W. W. Hennemann III, S. D. Thompson, M. J. Konecny, Metabolism of crab-eating foxes, Cerdocyon thous: ecological influences on the energetics of canids. Physiol. Zool. 56, 319-324 (1983).
539	U. Noll-Banholzer, Body temperature, oxygen consumption, evaporative water loss and heart rate in the fennec. Comparative Biochemistry Physiology Part A: Physiology 62, 585-592 (1979).
540	B. K. McNab, Energetics and the limits to a temperate distribution in armadillos. J. Mammal. 61, 606-627 (1980).
541	G. G. Montgomery, The ecology of arboreal folivores. (Smithsonian Institution Press, 1978).
542	A. Arends, B. K. McNab, The comparative energetics of ‘caviomorph’ rodents. Comparative Biochemistry Physiology Part A: Molecular Integrative Physiology 130, 105-122 (2001).
543	E. Müller, J. Kamau, G. Maloiy, A comparative study of basal metabolism and thermoregulation in a folivorous (Colobus guereza) and an omnivorous (Cercopithecus mitis) primate species. Comparative Biochemistry Physiology. A, Comparative Physiology 74, 319-322 (1983).
544	F. Aujard, M. Perret, G. Vannier, Thermoregulatory responses to variations of photoperiod and ambient temperature in the male lesser mouse lemur: a primitive or an advanced adaptive character? J. Comp. Physiol. B 168, 540-548 (1998).
545	L. Jansky, Working oxygen consumption in two species of wild rodents (Microtus arvalis, Clethrionomys glareolus). Physiol. Bohemoslov. 8, 472-478 (1959).
546	P. L. Dalby, A. G. Heath, Oxygen consumption and body temperature of the Argentine field mouse, Akodon azarae, in relation to ambient temperature. J. Therm. Biol. 1, 177-179 (1976).
547	F. Bozinovic, M. Rosenmann, Comparative energetics of south American cricetid rodents. Comparative biochemistry physiology. A, Comparative physiology 91, 195-202 (1988).
548	J. W. J. P. Z. Hudson, Temperature regulation and torpidity in the pygmy mouse, Baiomys taylori. Physiol. Zool. 38, 243-254 (1965).
549	B. K. McNab, The comparative energetics of rigid endothermy: the Arvicolidae. J. Zool. 227, 585-606 (1992).
550	D. R. Deavers, J. W. Hudson, Temperature regulation in two rodents (Clethrionomys gapperi and Peromyscus leucopus) and a shrew (Blarina brevicauda) inhabiting the same environment. Physiol. Zool. 54, 94-108 (1981).
551	Z.-G. Song, D.-H. Wang, Metabolism and thermoregulation in the striped hamster Cricetulus barabensis. J. Therm. Biol. 28, 509-514 (2003).
552	E. Caviedes-Vidal, F. Bozinovic, M. Rosenmann, Thermal freedom of Graomys griseoflavus in a seasonal environment. Comparative biochemistry physiology. A, Comparative physiology 87, 257-259 (1987).
553	R. W. Hill, Metabolism, thermal conductance, and body temperature in one of the largest species of Peromyscus, P. pirrensis. J. Therm. Biol. 1, 109-112 (1976).
554	R. Buffenstein, J. U. Jarvis, Thermoregulation and metabolism in the smallest African gerbil, Gerbillus pusillus. J. Zool. 205, 107-121 (1985).
555	G. P. Bell, G. A. Bartholomew, K. A. Nagy, The roles of energetics, water economy, foraging behavior, and geothermal refugia in the distribution of the bat, Macrotus californicus. J. Comp. Physiol. B 156, 441-450 (1986).
556	D. Banin, A. Haim, Z. Arad, Heat production in the levant vole Microtus guentheri. Isr. J. Zool. 39, 131-137 (1993).
557	G. C. Packard, Oxygen consumption of Microtus montanus in relation to ambient temperature. J. Mammal. 49, 215-220 (1968).
558	B. A. Wunder, D. S. Dobkin, R. D. Gettinger, Shifts of thermogenesis in the prairie vole (Microtus ochrogaster). Oecologia 29, 11-26 (1977).
559	R. G. Wiegert, Respiratory energy loss and activity patterns in the meadow vole, Microtus pennsylvanicus pennsylvanicus. Ecology 42, 245-253 (1961).
560	J.-S. Liu, D.-H. Wang, R.-Y. Sun, Metabolism and thermoregulation in three species of rodent from Northeastern China. J. Therm. Biol. 29, 177-183 (2004).
561	S. Saarela, R. Hissa, Metabolism, thermogenesis and daily rhythm of body temperature in the wood lemming, Myopus schisticolor. J. Comp. Physiol. B 163, 546-555 (1993).
562	J. N. Layne, P. G. Dolan, Thermoregulation, metabolism, and water economy in the golden mouse (Ochrotomys nuttalli). Comparative Biochemistry Physiology Part A: Physiology 52, 153-163 (1975).
563	W. G. Whitford, M. I. Conley, Oxygen consumption and water metabolism in a carnivorous mouse. Comparative Biochemistry Physiology, 797-803 (1971).
564	B. K. McNab, Physiological convergence amongst ant‐eating and termite‐eating mammals. J. Zool. 203, 485-510 (1984).
565	B. K. McNab, P. Morrison, Body temperature and metabolism in subspecies of Peromyscus from arid and mesic environments. Ecol. Monogr. 33, 63-82 (1963).
566	J. E. Brower, T. J. Cade, Ecology and physiology of Napaeozapus insignis (Miller) and other woodland mice. Ecology 47, 46-63 (1966).
567	R. V. Baudinette, S. Churchill, K. A. Christian, J. Nelson, P. J. Hudson, Energy, water balance and the roost microenvironment in three Australian cave-dwelling bats (Microchiroptera). J. Comp. Physiol. B 170, 439-446 (2000).
568	C. Busch, Metabolic rate and thermoregulation in two species of tuco-tuco, Ctenomys talarum and Ctenomys australis (Caviomorpha, Octodontidae). Comparative Biochemistry Physiology. A, Comparative physiology 93, 345-347 (1989).
569	B. K. McNab, The economics of temperature regulation in neutropical bats. Comparative Biochemistry Physiology 31, 227-268 (1969).
570	P. Kennedy, W. MacFarlane, Oxygen consumption and water turnover of the fat-tailed marsupials Dasycercus cristicauda and Sminthopsis crassicaudata. Comparative Biochemistry Physiology Part A: Physiology 40, 723-732 (1971).
571	F. Geiser, R. Baudinette, Daily torpor and thermoregulation in the small dasyurid marsupials Planigale glesi and Ningaui yvonneae. Aust. J. Zool. 36, 473-481 (1988).
572	X. Song, G. Körtner, F. Geiser, Reduction of metabolic rate and thermoregulation during daily torpor. J. Comp. Physiol. B 165, 291-297 (1995).
573	A. Sparti, Comparative temperature regulation of African and European shrew. Comparative Biochemistry Physiology Part A: Physiology 97, 391-397 (1990).
574	F. Bozinovic, L. C. Contreras, Basal rate of metabolism and temperature regulation of two desert herbivorous octodontid rodents: Octomys mimax and Tympanoctomys barrerae. Oecologia 84, 567-570 (1990).
575	Z. Nelson, M. Yousef, Thermoregulatory responses of desert wood rats, Neotoma lepida. Comparative Biochemistry Physiology Part A: Physiology 63, 109-113 (1979).
576	R. Buffenstein, The importance of microhabitat in thermoregulation and thermal conductance in two Namib rodents—a crevice dweller, Aethomys namaquensis, and a burrow dweller, Gerbillurus paeba. J. Therm. Biol. 9, 235-241 (1984).
577	E. T. Hooper, M. E. Hilali, Temperature regulation and habits in two species of jerboa, genus Jaculus. J. Mammal. 53, 574-593 (1972).
578	F. Bozinovic Kuscevic, Energetics thermoreoulation and torpor in the Chilean mouse-opossum Thylamys elegans (Didelphidae). Rev. Chil. Hist. Nat. 78, 199-206 (2005).
579	M. Genoud, F. J. Bonaccorso, A. Anends, Rate of metabolism and temperature regulation in two small tropical insectivorous bats (Peropteryx macrotis and Natalus tumidirostris). Comparative Biochemistry Physiology Part A: Physiology 97, 229-234 (1990).
580	E. Król, Metabolism and thermoregulation in the eastern hedgehog Erinaceus concolor. J. Comp. Physiol. B 164, 503-507 (1994).
581	A. Shkolnik, K. Schmidt-Nielsen, Temperature regulation in hedgehogs from temperate and desert environments. Physiol. Zool. 49, 56-64 (1976).
582	B. K. McNab, The standard energetics of mammalian carnivores: Felidae and Hyaenidae. Can. J. Zool. 78, 2227-2239 (2000).
583	T. Nakayama, T. Hori, T. Nagasaka, H. Tokura, E. Tadaki, Thermal and metabolic responses in the Japanese monkey at temperatures of 5-38 ℃. J. Appl. Physiol. 31, 332-337 (1971).
584	W. Bradley, M. Yousef, Thermoregulatory responses in the plains pocket gopher, Geomys bursarius. Comparative Biochemistry Physiology Part A: Physiology 52, 35-38 (1975).
585	W. Bradley, J. Miller, M. Yousef, Thermoregulatory patterns in pocket gophers: desert and mountain. Physiol. Zool. 47, 172-179 (1974).
586	J. M. Kamau, K. Johansen, G. Maloiy, Thermoregulation and standard metabolism of the slender mongoose (Herpestes sanguineus). Physiol. Zool. 52, 594-602 (1979).
587	T. Huynh et al., Effects of increasing temperatures on physiological changes in pigs at different relative humidities. J. Anim. Sci. 83, 1385-1396 (2005).
588	F. Geiser, D. Coburn, G. Kourtner, B. Law, Thermoregulation, energy metabolism, and torpor in blossom‐bats, Syconycteris australis (Megachiroptera). J. Zool. 239, 583-590 (1996).
589	L. C.-H. Wang, J. W. Hudson, Some physiological aspects of temperature regulation in the normothermic and torpid hispid pocket mouse, Perognathus hispidus. Comparative Biochemistry Physiology 32, 275-293 (1970).
590	W. Bradley, M. Yousef, I. M. Scott, Physiological studies on the rock pocket mouse, Perognathus intermedius. Comparative Biochemistry Physiology Part A: Physiology 50, 331-337 (1975).
591	W. R. Dawson, The relation of oxygen consumption to temperature in desert rodents. J. Mammal. 36, 543-553 (1955).
592	L. Breyen, W. Bradley, M. Yousef, Physiological and ecological studies on the chisel-toothed kangaroo rat, Dipodomys microps. Comparative Biochemistry Physiology Part A: Physiology 44, 543-555 (1973).
593	J. W. Hudson, J. A. Rummel, Water metabolism and temperature regulation of the primitive heteromyids, Liomys salvani and Liomys irroratus. Ecology 47, 345-354 (1966).
594	F. Bonaccorso, B. McNab, Standard energetics of leaf-nosed bats (Hipposideridae): its relationship to intermittent-and protracted-foraging tactics in bats and birds. J. Comp. Physiol. B 173, 43-53 (2003).
595	B. K. McNab, Temperature regulation and rate of metabolism in three Bornean bats. J. Mammal. 70, 153-161 (1989).
596	A. Haim, R. Van Aarde, J. Skinner, Metabolism and thermoregulation in the Cape porcupine, Hystrix africaeaustralis. Physiol. Zool. 63, 795-802 (1990).
597	H. L. Daniels, Oxygen consumption in Lemur fulvus: deviation from the ideal model. J. Mammal. 65, 584-592 (1984).
598	T. E. Katzner, K. L. Parker, H. H. Harlow, Metabolism and thermal response in winter-acclimatized pygmy rabbits (Brachylagus idahoensis). J. Mammal. 78, 1053-1062 (1997).
599	T. Dawson, K. Schmidt‐Nielsen, Effect of thermal conductance on water economy in the antelope jack rabbit, Lepus alleni. J. Cell. Physiol. 67, 463-471 (1966).
600	C. Xiao et al., Energy metabolism and thermoregulation in pygmy lorises (Nycticebus pygmaeus) from Yunnan Daweishan Nature Reserve. Acta Ecol. Sin. 30, 129-134 (2010).
601	G. t. Hildwein, M. Goffart, Standard metabolism and thermoregulation in a prosimian Perodicticus potto. Comparative Biochemistry Physiology Part A: Physiology 50, 201-213 (1975).
602	W. R. Dawson, A. F. Bennett, Energy metabolism and thermoregulation of the spectacled hare wallaby (Lagorchestes conspicillatus). Physiol. Zool. 51, 114-130 (1978).
603	T. J. Dawson, A. Hulbert, Standard metabolism, body temperature, and surface areas of Australian marsupials. American Journal of Physiology-Legacy Content 218, 1233-1238 (1970).
604	T. J. Dawson, C. E. Blaney, A. J. Munn, A. Krockenberger, S. K. Maloney, Thermoregulation by kangaroos from mesic and arid habitats: influence of temperature on routes of heat loss in eastern grey kangaroos (Macropus giganteus) and red kangaroos (Macropus rufus). Physiological Biochemical Zoology 73, 374-381 (2000).
605	B. Leon, A. Shkolnik, T. Shkolnik, Temperature regulation and water metabolism in the elephant shrew Elephantulus edwardi. Comparative biochemistry physiology. A, Comparative physiology 74, 399-407 (1983).
606	L. Roxburgh, M. Perrin, Temperature regulation and activity pattern of the round-eared elephant shrew Macroscelides proboscideus. J. Therm. Biol. 19, 13-20 (1994).
607	P. Leitner, J. E. Nelson, Body temperature, oxygen consumption and heart rate in the Australian false vampire bat, Macroderma gigas. Comparative Biochemistry Physiology 21, 65-74 (1967).
608	M. Perrin, E. Richardson, Metabolic rate, maximum metabolism, and advantages of torpor in the fat mouse Steatomys pratensis natalensis Roberts, 1921 (Dendeomurinae). J. Therm. Biol. 30, 603-610 (2005).
609	A. Rodríguez-Durán, Metabolic rates and thermal conductance in four species of neotropical bats roosting in hot caves. Comparative Biochemistry Physiology Part A: Physiology 110, 347-355 (1995).
610	F. J. Bonaccorso, A. Arends, M. Genoud, D. Cantoni, T. Morton, Thermal ecology of moustached and ghost-faced bats (Mormoopidae) in Venezuela. J. Mammal. 73, 365-378 (1992).
611	G. A. Bartholomew, P. Leitner, J. E. Nelson, Body temperature, oxygen consumption, and heart rate in three species of Australian flying foxes. Physiol. Zool. 37, 179-198 (1964).
612	A. Shkolnik, A. Borut, Temperature and water relations in two species of spiny mice (Acomys). J. Mammal. 50, 245-255 (1969).
613	A. Haim, A. Borut, Heat production and dissipation in golden spiny mice, Acomys russatus from two extreme habitats. J. Comp. Physiol. 142, 445-450 (1981).
614	A. Haim, A. Rubal, J. Harari, Comparative thermoregulatory adaptations of field mice of the genus Apodemus to habitat challenges. J. Comp. Physiol. B 163, 602-607 (1993).
615	A. Haim, Thermoregulation and metabolism of Wagner's gerbil (Gerbillus dasyurus): a rock dwelling rodent adapted to arid and mesic environments. J. Therm. Biol. 12, 45-48 (1987).
616	E. R. Dempster, C. T. Downs, M. Griffin, M. R. Perrin, Gerbillurus setzeri. (Soc., 1998).
617	C. T. Downs, M. Perrin, Thermal parameters of four species of Gerbillurus. J. Therm. Biol. 15, 291-300 (1990).
618	E. R. Dempsters, M. R. Perrin, C. T. Downs, Gerbillurus vallinus. Mamm. Species, 1-4 (1999).
619	A. Haim, Adaptive variations in heat production within gerbils (genus Gerbillus) from different habitats. Oecologia 61, 49-52 (1984).
620	P. F. Robinson, Metabolism of the gerbil, Meriones unguiculatus. Science 130, 502-503 (1959).
621	A. Haim, A. Shabtay, Z. Arad, The thermoregulatory and metabolic responses to photoperiod manipulations of the Macedonian mouse (Mus macedonicus), a post-fire invader. J. Therm. Biol. 24, 279-286 (1999).
622	R. E. Macmillen, A. K. Lee, Energy metabolism and pulmocutaneous water loss of Australian hopping mice. Comparative Biochemistry Physiology 35, 355-369 (1970).
623	E. F. Müller, Energy metabolism, thermoregulation and water budget in the slow loris (Nycticebus coucang, Boddaert 1785). Comparative Biochemistry Physiology Part A: Physiology 64, 109-119 (1979).
624	A. Haim, N. Fairall, Bioenergetics of an herbivorous rodent Otomys irroratus. Physiol. Zool. 60, 305-309 (1987).
625	B. Collins, S. Bradshaw, Studies on the metabolism, thermoregulation, and evaporative water losses of two species of Australian rats, Rattus villosissimus and Rattus rattus. Physiol. Zool. 46, 1-21 (1973).
626	O. P. Pearson, The oxygen consumption and bioenergetics of harvest mice. Physiol. Zool. 33, 152-160 (1960).
627	D. Vleck, The energy cost of burrowing by the pocket gopher Thomomys bottae. Physiol. Zool. 52, 122-136 (1979).
628	G. L. Worthen, D. L. Kilgore, Metabolic rate of pine marten in relation to air temperature. J. Mammal. 62, 624-628 (1981).
629	B. A. Wunder, Temperature regulation and the effects of water restriction on Merriams's chipmunk, Eutamias merriami. Comparative biochemistry physiology 33, 385-403 (1970).
630	C. T. Downs, M. Perrin, The thermal biology of the white-tailed rat Mystromys albicaudatus, a cricetine relic in southern temperate African grassland. Comparative Biochemistry Physiology Part A: Physiology 110, 65-69 (1995).
631	J. T. Stitt, J. D. Hardy, Thermoregulation in the squirrel monkey (Saimiri sciureus). J. Appl. Physiol. 31, 48-54 (1971).
632	M. Malinow, R. Wagner, Oxygen uptake in squirrel monkeys (Saimiri sciurea). Lab. Anim. Care 16, 105 (1966).
633	P. J. Soriano, A. Ruiz, A. Arends, Physiological responses to ambient temperature manipulation by three species of bats from Andean cloud forests. J. Mammal. 83, 445-457 (2002).
634	F. Bozinovic, Rate of basal metabolism of grazing rodents from different habitats. J. Mammal. 73, 379-384 (1992).
635	M. B. Araújo et al., Heat freezes niche evolution. Ecol. Lett. 16, 1206-1219 (2013).
636	D. A. Rosen, A. W. Trites, Thermal limits in young northern fur seals, Callorhinus ursinus. Mar. Mamm. Sci. 30, 1014-1028 (2014).
637	E. Müller, J. Kamau, G. Maloiy, O2-uptake, thermoregulation and heart rate in the springhare (Pedetes capensis). J. Comp. Physiol. 133, 187-191 (1979).
638	A. Larcombe, Effects of temperature on metabolism, ventilation, and oxygen extraction in the southern brown bandicoot Isoodon obesulus (Marsupialia: Peramelidae). Physiological Biochemical Zoology 75, 405-411 (2002).
639	A. Kinnear, J. Shield, Metabolism and temperature regulation in marsupials. Comparative Biochemistry Physiology Part A: Physiology 52, 235-245 (1975).
640	M. R. Fleming, Thermoregulation and torpor in the sugar glider, Petaurus Breviceps (Marsupialia: Petauridae). Aust. J. Zool. 28, 521-534 (1980).
641	B. K. McNab, The comparative energetics of New Guinean cuscuses (Metatheria: Phalangeridae). J. Mammal. 89, 1145-1151 (2008).
642	K. L. Knudsen, J. D. Kilgore, Temperature regulation and basal metabolic rate in the spotted skunk, Spilogale putorius. Comparative Biochemistry Physiology. A, Comparative Physiology 97, 27-33 (1990).
643	R. Degabriele, T. Dawson, Metabolism and heat balance in an arboreal marsupial, the koala (Phascolarctos cinereus). Journal of Comparative Physiology B: Biochemical, Systemic, Environmental Physiology 134, 293-301 (1979).
644	L. P. Folkow, A. S. Blix, Nasal heat and water exchange in gray seals. American Journal of Physiology-Regulatory, Integrative Comparative Physiology 253, R883-R889 (1987).
645	A. Arends, F. J. Bonaccorso, M. Genoud, Basal rates of metabolism of nectarivorous bats (Phyllostomidae) from a semiarid thorn forest in Venezuela. J. Mammal. 76, 947-956 (1995).
646	A. Cruz-Neto, A. Abe, Taxa metabólica e termorregulaçâo no morcego nectarívoro, Glossophaga soricina (Chiroptera, Phyllostomatidae). Rev. Bras. Biol. 57, 203-209 (1997).
647	E. Müller, U. Lojewski, Thermoregulation in the meerkat (Suricata suricatta Schreber, 1776). Comparative Biochemistry Physiology. A, Comparative Physiology 83, 217-224 (1986).
648	G. Whittow, C. Scammell, M. Leong, D. Rand, Temperature regulation in the smallest ungulate, the lesser mouse deer (Tragulus javanicus). Comparative Biochemistry Physiology Part A: Physiology 56, 23-26 (1977).
649	C. K. Willis, C. Turbill, F. Geiser, Torpor and thermal energetics in a tiny Australian vespertilionid, the little forest bat (Vespadelus vulturnus). J. Comp. Physiol. B 175, 479-486 (2005).
650	K. Rübsamen, I. Hume, W. Foley, U. Rübsamen, Implications of the large surface area to body mass ratio on the heat balance of the greater glider (Petauroides volans: Marsupialia). J. Comp. Physiol. B 154, 105-111 (1984).
651	R. Rose, Metabolic rate and thermal conductance in a mycophagous marsupial, Bettongia gaimardi. J. Biol. 2, (1997).
652	S. Nicol, Oxygen consumption and nitrogen metabolism in the potoroo, Potorous tridactylus. Comparative Biochemistry Physiology Part A: Physiology 55, 215-218 (1976).
653	G. A. Bartholomew, M. Rainy, Regulation of body temperature in the rock hyrax, Heterohyrax brucei. Journal of Mammalogy 52, 81-95 (1971).
654	K. Rübsamen, R. Heller, H. Lawrenz, W. v. Engelhardt, Water and energy metabolism in the rock hyrax (Procavia habessinica). J. Comp. Physiol. 131, 303-309 (1979).
655	M.-C. Chevillard-Hugot, E. Muller, E. Kulzer, Oxygen consumption, body temperature and heart rate in the coati (Nasua nasua). Comparative Biochemistry Physiology, A 65, 305-309 (1980).
656	R. E. MacMillen, R. V. Baudinette, A. K. Lee, Water economy and energy metabolism of the sandy inland mouse, Leggadina hermannsburgensis. J. Mammal. 53, 529-539 (1972).
657	G. A. Bartholomew, W. R. Dawson, R. C. Lasiewski, Thermoregulation and heterothermy in some of the smaller flying foxes (Megachiroptera) of New Guinea. Zeitschrift Für Vergleichende Physiologie 70, 196-209 (1970).
658	W. Bartels, B. Law, F. Geiser, Daily torpor and energetics in a tropical mammal, the northern blossom-bat Macroglossus minimus (Megachiroptera). J. Comp. Physiol. B 168, 233-239 (1998).
659	F. J. Bonaccorso, B. K. McNab, Plasticity of energetics in blossom bats (Pteropodidae): impact on distribution. J. Mammal. 78, 1073-1088 (1997).
660	A. Haim, J. Skinner, A comparative study of metabolic rates and thermoregulation of two African antelopes, the steenbok Raphicerus campestris and the blue duiker Cephalophus monticola. J. Therm. Biol. 16, 145-148 (1991).
661	M. Genoud, F. J. Bonaccorso, Temperature regulation, rate of metabolism, and roost temperature in the greater white-lined bat Saccopteryx bilineata (Emballonuridae). Physiol. Zool. 59, 49-54 (1986).
662	D. S. Hinds, Acclimatization of thermoregulation in the desert cottontail, Sylvilagus audubonii. J. Mammal. 54, 708-728 (1973).
663	L. N. Rfinking, D. L. Kilgore Jr, E. S. Fairbanks, J. D. Hamilton, Temperature regulation in normothermic black-tailed prairie dogs, Cynomys ludovicianus. Comparative Biochemistry Physiology Part A: Physiology 57, 161-165 (1977).
664	G. J. Tattersall, W. K. Milsom, Transient peripheral warming accompanies the hypoxic metabolic response in the golden-mantled ground squirrel. J. Exp. Biol. 206, 33-42 (2003).
665	T. J. Dawson, R. Degabriele, The cuscus (Phalanger maculatus)—a marsupial sloth? J. Comp. Physiol. 83, 41-50 (1973).
666	N. J. Willems, K. B. Armitage, Thermoregulation and water requirements in semiarid and montane populations of the least chipmunk, Eutamias minimus—III. Acclimatization at a high ambient temperature. Comparative Biochemistry Physiology Part A: Physiology 52, 121-128 (1975).
667	R. W. Pauls, Energetics of the red squirrel: a laboratory study of the effects of temperature, seasonal acclimatization, use of the nest and exercise. J. Therm. Biol. 6, 79-86 (1981).
668	P. Withers, K. Richardson, R. Wooller, Metabolic physiology of euthermic and torpid honey possums, Tarsipes rostratus. Aust. J. Zool. 37, 685-693 (1989).
669	C. M. Neal, S. I. Lustick, Energetics and evaporative water loss in the short-tailed shrew Blarina brevicauda. Physiol. Zool. 46, 180-185 (1973).
670	Z. Gebczynska, M. Gebczynska, Oxygen consumption in two species of water-shrews. Acta Theriol., (1965).
671	S. L. Lindstedt, Energetics and water economy of the smallest desert mammal. Physiol. Zool. 53, 82-97 (1980).
672	P. Morrison, F. A. Ryser, A. R. Dawe, Studies on the physiology of the masked shrew Sorex cinereus. Physiol. Zool. 32, 256-271 (1959).
673	J. Andrews, R. McDevitt, Seasonal variation in the metabolic rate of the Pygmy shrew, Sorex minutus: can resting metabolic rate be measured in post-absorptive shrews? J. Therm. Biol. 20, 255-261 (1995).
674	L. C. Contreras, Bioenergetics and distribution of fossorial Spalacopus cyanus (Rodentia): thermal stress, or cost of burrowing. Physiol. Zool. 59, 20-28 (1986).
675	R. V. Baudinette, Energy metabolism and evaporative water loss in the California ground squirrel. Journal of Comparative Physiology A: Neuroethology, Sensory, Neural, Behavioral Physiology 81, 57-72 (1972).
676	H. Liwanag et al., The effects of water temperature on the energetic costs of juvenile and adult California sea lions (Zalophus californianus): the importance of skeletal muscle thermogenesis for thermal balance. J. Exp. Biol. 212, 3977-3984 (2009).
677	K. L. Campbell, I. W. McIntyre, R. A. MacArthur, Fasting metabolism and thermoregulatory competence of the star-nosed mole, Condylura cristata (Talpidae: Condylurinae). Comparative Biochemistry Physiology Part A: Molecular Integrative Physiology 123, 293-298 (1999).
678	B. G. Lovegrove, G. Heldmaier, M. Knight, Seasonal and circadian energetic patterns in an arboreal rodent, Thallomys paedulcus, and a burrow-dwelling rodent, Aethomys namaquensis, from the Kalahari Desert. J. Therm. Biol. 16, 199-209 (1991).
679	B. K. McNab, P. C. Wright, Temperature regulation and oxygen consumption in the Philippine tarsier Tarsius syrichta. Physiol. Zool. 60, 596-600 (1987).
680	S. M. Zervanos, Seasonal effects of temperature on the respiratory metabolism of the collared peccary (Tayassu tajacu). Comparative Biochemistry Physiology Part A: Physiology 50, 365-371 (1975).
681	A. B. Irvine, Manatee metabolism and its influence on distribution in Florida. Biol. Conserv. 25, 315-334 (1983).
682	L. Zhang, J.-h. Cai, Z.-k. Wang, Metabolism and thermoregulation in the tree shrew, Tupaia belangeri. Journal of Stress Physiology Biochemistry 8, 167-178 (2012).
683	T. M. Williams, J. Haun, R. Davis, L. Fuiman, S. Kohin, A killer appetite: metabolic consequences of carnivory in marine mammals. Comparative Biochemistry Physiology Part A: Molecular Integrative Physiology 129, 785-796 (2001).
684	D. Hosken, P. Withers, Temperature regulation and metabolism of an Australian bat, Chalinolobus gouldii (Chiroptera: Vespertilionidae) when euthermic and torpid. J. Comp. Physiol. B 167, 71-80 (1997).
685	C. K. Willis, J. E. Lane, E. T. Liknes, D. L. Swanson, R. M. Brigham, Thermal energetics of female big brown bats (Eptesicus fuscus). Can. J. Zool. 83, 871-879 (2005).
686	P. M. Cryan, B. O. J. J. o. E. B. Wolf, Sex differences in the thermoregulation and evaporative water loss of a heterothermic bat, Lasiurus cinereus, during its spring migration. J. Exp. Biol. 206, 3381-3390 (2003).
687	M. Machado, P. J. Soriano, Temperature regulation in two insectivorous bats (Myotis keaysi and Myotis oxyotus) from the Venezuelan Andes. Ecotropicos 20, 45-54 (2007).
688	G. W. Holyoak, R. C. Stones, Temperature regulation of the little brown bat, Myotis lucifugus after acclimation at various ambient temperatures. Comparative Biochemistry Physiology Part A: Physiology 39, 413-420 (1971).
689	M. J. O'farrell, E. H. Studier, Fall metabolism in relation to ambient temperatures in three species of Myotis. Comparative Biochemistry Physiology 35, 697-703 (1970).
690	F. Geiser, R. Brigham, Torpor, thermal biology, and energetics in Australian long-eared bats (Nyctophilus). J. Comp. Physiol. B 170, 153-162 (2000).
691	J. Williams, A. Munoz-Garcia, S. Ostrowski, B. Tieleman, A phylogenetic analysis of basal metabolism, total evaporative water loss, and life-history among foxes from desert and mesic regions. J. Comp. Physiol. B 174, 29-39 (2004).
692	W. W. Hennemann, M. J. Konecny, Oxygen consumption in large spotted genets, Genetta tigrina. J. Mammal. 61, 747-750 (1980).
693	R. Wells, Thermoregulation and activity rhythms in the hairly-nosed wombats, Laisorhinus, latifrons (Owen), (Vombatidae). Aust. J. Zool. 26, 639-651 (1978).
